# Supplementary material for: Methodological Approaches and Literature Analysis in the Study of Soil Carbon in Urban Green Spaces: A Systematic Review
Source: Preprints.org preprint supplement (doi:10.20944/preprints202405.1318.v1), 2024-05-21
Supplement: Supplementary file 1 [file supplementary]

## Sheet: SEARCHING_1
SEARCHING: Search terms and variables.
Group 1	Urban soil	Urban agriculture soil	Urban green space soil	Urban garden soil	Urban park soil
	(central terms)
Group 2	Carbon	Carbon capture	Carbon sequestration	Carbon storage	Carbon stock
	(central terms)

## Sheet: SEARCHING_2
SEARCHING: Results for each search
Search:	“Urban soil AND Carbon"									Search:	“Urban soil AND Carbon"
Search ID:	1									Search ID:	26
Database:	WOS									Database:	Scopus
Search date:	2023-10-16									Search date:	2023-10-17
Date:	2021-2024									Date:	2021-2024
Type	Articles and Book Chapter									Type	Articles and Book Chapter
Results:	2185									Results:	862
Link of the search:	https://www.webofscience.com/wos/woscc/summary/0daac79a-6b67-4cef-8d14-6f948d450432-abafe602/times-cited-descending/1									Link of the search:
Search:	“Urban soil AND Carbon capture"									Search:	“Urban soil AND Carbon capture"
Search ID:	2									Search ID:	27
Database:	WOS									Database:	Scopus
Search date:	2023-10-16									Search date:	2023-10-17
Date:	2021-2024									Date:	2021-2024
Type	Articles and Book Chapter									Type	Articles and Book Chapter
Results:	56									Results:	21
Link of the search:	https://www.webofscience.com/wos/woscc/summary/73351adf-f82f-453f-a0e5-cce9f5793f71-abb07b12/times-cited-descending/1									Link of the search:
Search:	“Urban soil AND Carbon sequestration"									Search:	“Urban soil AND Carbon sequestration"
Search ID:	3									Search ID:	28
Database:	WOS									Database:	Scopus
Search date:	2023-10-16									Search date:	2023-10-17
Date:	2021-2024									Date:	2021-2024
Type	Articles and Book Chapter									Type	Articles and Book Chapter
Results:	390									Results:	188
Link of the search:	https://www.webofscience.com/wos/woscc/summary/8f8a3010-8964-44a0-bdd0-18b76cce0e8b-abb11160/times-cited-descending/1									Link of the search:
Search:	“Urban soil AND Carbon storage"									Search:	“Urban soil AND Carbon storage"
Search ID:	4									Search ID:	29
Database:	WOS									Database:	Scopus
Search date:	2023-10-16									Search date:	2023-10-17
Date:	2021-2024									Date:	2021-2024
Type	Articles and Book Chapter									Type	Articles and Book Chapter																	23
Results:	317									Results:	141
Link of the search:	https://www.webofscience.com/wos/woscc/summary/ba6cfc2c-fe86-450b-ae18-68fdb0031aed-abb11e8a/times-cited-descending/1									Link of the search:
Search:	“Urban soil AND Carbon stock"									Search:	“Urban soil AND Carbon stock"
Search ID:	5									Search ID:	30
Database:	WOS									Database:	Scopus
Search date:	2023-10-16									Search date:	2023-10-17
Date:	2021-2024									Date:	2021-2024
Type	Articles and Book Chapter									Type	Articles and Book Chapter
Results:	221									Results:	83
Link of the search:	https://www.webofscience.com/wos/woscc/summary/7db598ed-5332-491b-97b4-c6bd420d4921-abb15af3/times-cited-descending/1									Link of the search:
Search:	“Urban agriculture soil AND Carbon"									Search:	“Urban agriculture soil AND Carbon"
Search ID:	6									Search ID:	31
Database:	WOS									Database:	Scopus
Search date:	2023-10-16									Search date:	2023-10-17
Date:	2021-2024									Date:	2021-2024
Type	Articles and Book Chapter									Type	Articles and Book Chapter
Results:	744									Results:	100
Link of the search:	https://www.webofscience.com/wos/woscc/summary/7f83773a-c261-4de2-adfb-668cb4290f01-abb199e3/times-cited-descending/1									Link of the search:
Search:	“Urban agriculture soil AND Carbon capture"									Search:	“Urban agriculture soil AND Carbon capture"
Search ID:	7									Search ID:	32
Database:	WOS									Database:	Scopus
Search date:	2023-10-16									Search date:	2023-10-17
Date:	2021-2024									Date:	2021-2024
Type	Articles and Book Chapter									Type	Articles and Book Chapter
Results:	15									Results:	1
Link of the search:	https://www.webofscience.com/wos/woscc/summary/75f3336f-2fb0-459f-8c73-1d5c323ab4e0-abb1dbf6/times-cited-descending/1									Link of the search:
Search:	“Urban agriculture soil AND Carbon sequestration"									Search:	“Urban agriculture soil AND Carbon sequestration"
Search ID:	8									Search ID:	33
Database:	WOS									Database:	Scopus
Search date:	2023-10-16									Search date:	2023-10-17
Date:	2021-2024									Date:	2021-2024
Type	Articles and Book Chapter									Type	Articles and Book Chapter
Results:	144									Results:	24
Link of the search:	https://www.webofscience.com/wos/woscc/summary/03a27c73-1089-4546-bd0e-88ddfd3c843b-abb2198f/times-cited-descending/1									Link of the search:
Search:	“Urban agriculture soil AND Carbon storage"									Search:	“Urban agriculture soil AND Carbon storage"
Search ID:	9									Search ID:	34
Database:	WOS									Database:	Scopus
Search date:	2023-10-16									Search date:	2023-10-17
Date:	2021-2024									Date:	2021-2024
Type	Articles and Book Chapter									Type	Articles and Book Chapter
Results:	95									Results:	13
Link of the search:	https://www.webofscience.com/wos/woscc/summary/f898f345-89d0-4912-ac81-f23b1e6f7e87-abb2681c/times-cited-descending/1									Link of the search:
Search:	“Urban agriculture soil AND Carbon stock"									Search:	“Urban agriculture soil AND Carbon stock"
Search ID:	10									Search ID:	35
Database:	WOS									Database:	Scopus
Search date:	2023-10-16									Search date:	2023-10-17
Date:	2021-2024									Date:	2021-2024
Type	Articles and Book Chapter									Type	Articles and Book Chapter
Results:	87									Results:	10
Link of the search:	https://www.webofscience.com/wos/woscc/summary/5fbb1490-7ad8-4984-b10f-c5ba09e76f40-abb2b4ed/times-cited-descending/1									Link of the search:
Search:	“Urban green space soil AND carbon"									Search:	“Urban green space soil AND carbon"
Search ID:	11									Search ID:	36
Database:	WOS									Database:	Scopus
Search date:	2023-10-17									Search date:	2023-10-17
Date:	2021-2024									Date:	2021-2024
Type	Articles and Book Chapter									Type	Articles and Book Chapter
Results:	58									Results:	61
Link of the search:	https://www.webofscience.com/wos/woscc/summary/4595a1df-6f1d-473e-b13d-2aa1052585a4-abf37c09/relevance/1									Link of the search:
Search:	“Urban green space soil AND Carbon capture"									Search:	“Urban green space soil AND Carbon capture"
Search ID:	12									Search ID:	37
Database:	WOS									Database:	Scopus
Search date:	2023-10-17									Search date:	2023-10-17
Date:	2021-2024									Date:	2021-2024
Type	Articles and Book Chapter									Type	Articles and Book Chapter
Results:	1									Results:	2
Link of the search:	https://www.webofscience.com/wos/woscc/summary/a5dc5ca2-1d6a-4d8a-b5d7-ea05f228af29-abf38d5a/relevance/1									Link of the search:
Search:	“Urban green space soil AND Carbon sequestration"									Search:	“Urban green space soil AND Carbon sequestration"
Search ID:	13									Search ID:	38
Database:	WOS									Database:	Scopus
Search date:	2023-10-17									Search date:	2023-10-17
Date:	2021-2024									Date:	2021-2024
Type	Articles and Book Chapter									Type	Articles and Book Chapter
Results:	21									Results:	24
Link of the search:	https://www.webofscience.com/wos/woscc/summary/9d5f5b0a-0ddd-4b45-96cd-dfa7a9fd5165-abf3a363/relevance/1									Link of the search:
Search:	“Urban green space soil AND Carbon storage"									Search:	“Urban green space soil AND Carbon storage"
Search ID:	14									Search ID:	39
Database:	WOS									Database:	Scopus
Search date:	2023-10-17									Search date:	2023-10-17
Date:	2021-2024									Date:	2021-2024
Type	Articles and Book Chapter									Type	Articles and Book Chapter
Results:	16									Results:	15
Link of the search:	https://www.webofscience.com/wos/woscc/summary/75c27272-1020-4254-9e6e-aa2540defcc7-abf3c3ed/relevance/1									Link of the search:
Search:	“Urban green space soil AND Carbon stock"									Search:	“Urban green space soil AND Carbon stock"
Search ID:	15									Search ID:	40
Database:	WOS									Database:	Scopus
Search date:	2023-10-17									Search date:	2023-10-17
Date:	2021-2024									Date:	2021-2024
Type	Articles and Book Chapter									Type	Articles and Book Chapter
Results:	15									Results:	10
Link of the search:	https://www.webofscience.com/wos/woscc/summary/b5f15e4c-5779-4833-8c9f-fd23562f84ad-abf3dc67/relevance/1									Link of the search:
Search:	“Urban garden soil AND Carbon"									Search:	“Urban garden soil AND Carbon"
Search ID:	16									Search ID:	41
Database:	WOS									Database:	Scopus
Search date:	2023-10-16									Search date:	2023-10-17
Date:	2021-2024									Date:	2021-2024
Type	Articles and Book Chapter									Type	Articles and Book Chapter
Results:	112									Results:	46
Link of the search:	https://www.webofscience.com/wos/woscc/summary/d899de2b-6f8c-4a4f-85d7-67bdf54476b3-abb53496/times-cited-descending/1									Link of the search:
Search:	“Urban garden soil AND Carbon capture"									Search:	“Urban garden soil AND Carbon capture"
Search ID:	17									Search ID:	42
Database:	WOS									Database:	Scopus
Search date:	2023-10-16									Search date:	2023-10-17
Date:	2021-2024									Date:	2021-2024
Type	Articles and Book Chapter									Type	Articles and Book Chapter
Results:	5									Results:	3
Link of the search:	https://www.webofscience.com/wos/woscc/summary/da12951c-2b3a-4e1d-9188-9bec4b526a9d-abb560d9/times-cited-descending/1									Link of the search:
Search:	“Urban garden soil AND Carbon sequestration"									Search:	“Urban garden soil AND Carbon sequestration"
Search ID:	18									Search ID:	43
Database:	WOS									Database:	Scopus
Search date:	2023-10-16									Search date:	2023-10-17
Date:	2021-2024									Date:	2021-2024
Type	Articles and Book Chapter									Type	Articles and Book Chapter
Results:	27									Results:	10
Link of the search:	https://www.webofscience.com/wos/woscc/summary/ea784aad-96c3-4688-9a81-054c155657b0-abb57514/times-cited-descending/1									Link of the search:
Search:	“Urban garden soil AND Carbon storage"									Search:	“Urban garden soil AND Carbon storage"
Search ID:	19									Search ID:	44
Database:	WOS									Database:	Scopus
Search date:	2023-10-16									Search date:	2023-10-17
Date:	2021-2024									Date:	2021-2024
Type	Articles and Book Chapter									Type	Articles and Book Chapter
Results:	22									Results:	6
Link of the search:	https://www.webofscience.com/wos/woscc/summary/6a47e986-238a-4611-ab5f-b99b717bff4f-abb59dcc/times-cited-descending/1									Link of the search:
Search:	“Urban garden soil AND Carbon stock"									Search:	“Urban garden soil AND Carbon stock"
Search ID:	20									Search ID:	45
Database:	WOS									Database:	Scopus
Search date:	2023-10-16									Search date:	2023-10-17
Date:	2021-2024									Date:	2021-2024
Type	Articles and Book Chapter									Type	Articles and Book Chapter
Results:	20									Results:	5
Link of the search:	https://www.webofscience.com/wos/woscc/summary/d4955c80-b261-44cd-a2ac-bd27cb9f3c47-abb5bdd4/times-cited-descending/1									Link of the search:
Search:	"Urban park soil and Carbon"									Search:	"Urban park soil and Carbon"
Search ID:	21									Search ID:	46
Database:	WOS									Database:	Scopus
Search date:	2023-10-17									Search date:	2023-10-17
Date:	2021-2024									Date:	2021-2024
Type	Articles and Book Chapter									Type	Articles and Book Chapter
Results:	62									Results:	216
Link of the search:	https://www.webofscience.com/wos/woscc/summary/d67a3164-47d9-43a8-9911-d961560b2f98-abf4dbeb/relevance/1									Link of the search:
Search:	"Urban park soil and Carbon capture"									Search:	"Urban park soil and Carbon capture"
Search ID:	22									Search ID:	47
Database:	WOS									Database:	Scopus
Search date:	2023-10-17									Search date:	2023-10-17
Date:	2021-2024									Date:	2021-2024
Type	Articles and Book Chapter									Type	Articles and Book Chapter
Results:	1									Results:	10
Link of the search:	https://www.webofscience.com/wos/woscc/summary/995c8a54-6f5d-460e-ad92-dbd9247fe304-abf534a8/relevance/1									Link of the search:
Search:	"Urban park soil and Carbon sequestration"									Search:	"Urban park soil and Carbon sequestration"
Search ID:	23									Search ID:	48
Database:	WOS									Database:	Scopus
Search date:	2023-10-17									Search date:	2023-10-17
Date:	2021-2024									Date:	2021-2024
Type	Articles and Book Chapter									Type	Articles and Book Chapter
Results:	22									Results:	58
Link of the search:	https://www.webofscience.com/wos/woscc/summary/8133c724-44c6-4ff3-a6e5-3ca644f8c39e-abf554d5/relevance/1									Link of the search:
Search:	"Urban park soil and Carbon storage"									Search:	"Urban park soil and Carbon storage"
Search ID:	24									Search ID:	49
Database:	WOS									Database:	Scopus
Search date:	2023-10-17									Search date:	2023-10-17
Date:	2021-2024									Date:	2021-2024
Type	Articles and Book Chapter									Type	Articles and Book Chapter
Results:	14									Results:	30
Link of the search:	https://www.webofscience.com/wos/woscc/summary/942ed853-e3ac-4f9a-8a44-ecf3b0fd95a6-abf56ff5/relevance/1									Link of the search:
Search:	"Urban park soil and Carbon stock"									Search:	"Urban park soil and Carbon stock"
Search ID:	25									Search ID:	50
Database:	WOS									Database:	Scopus
Search date:	2023-10-17									Search date:	2023-10-17
Date:	2021-2024									Date:	2021-2024
Type	Articles and Book Chapter									Type	Articles and Book Chapter
Results:	15									Results:	15
Link of the search:	https://www.webofscience.com/wos/woscc/summary/8db4b54e-2c99-4b64-8296-89f49215572a-abf58a86/relevance/1									Link of the search:

## Sheet: SEARCHING_3
SEARCHING: Summary of results for each search
Type: Articles and Book Chapters
WOS	Urban soil	Urban agriculture soil	Urban green space soil	Urban garden soil	Urban park soil	Results
Carbon	2185	744	58	112	62
Carbon capture	56	15	1	5	1
Carbon sequestration	390	144	21	27	22
Carbon storage	317	95	16	22	14
Carbon stock	221	87	15	20	15
Total	3169	1085	111	186	114	4665
Type: Articles and Book Chapters
SCOPUS	Urban soil	Urban agriculture soil	Urban green space soil	Urban garden soil	Urban park soil	Results
Carbon	862	100	61	46	216
Carbon capture	21	1	2	3	10
Carbon sequestration	188	24	24	10	58
Carbon storage	141	13	15	6	30
Carbon stock	83	10	10	5	15
Total	1295	148	112	70	329	1954
	Total Results
	WOS + Scopus					6619

## Sheet: SEARCHING_4
SEARCHING: Search results included
ID 1
Authors	Article Title	Source Title	Document Type	Affiliations	ISSN	Publication Year	DOI
Zamora-Ledezma, C; Negrete-Bolagay, D; Figueroa, F; Zamora-Ledezma, E; Ni, M; Alexis, F; Guerrero, VH	Heavy metal water pollution: A fresh look about hazards, novel and conventional remediation methods	ENVIRONMENTAL TECHNOLOGY & INNOVATION	Article	Universidad Catolica de Murcia; Universidad Tecnica de Manabi; Escuela Politecnica Nacional Ecuador	2352-1864	2021	10.1016/j.eti.2021.101504
Montanarella, L; Panagos, P	The relevance of sustainable soil management within the European Green Deal	LAND USE POLICY	Article	European Commission Joint Research Centre; EC JRC ISPRA Site	0264-8377	2021	10.1016/j.landusepol.2020.104950
Qian, K; Chen, H; Li, WL; Ao, ZM; Wu, YN; Guan, XH	Single-Atom Fe Catalyst Outperforms Its Homogeneous Counterpart for Activating Peroxymonosulfate to Achieve Effective Degradation of Organic Contaminants	ENVIRONMENTAL SCIENCE & TECHNOLOGY	Article	Tongji University; Tongji University; Southern University of Science & Technology; Guangdong University of Technology	0013-936X	2021	10.1021/acs.est.0c08805
Qu, JH; Liu, Y; Cheng, L; Jiang, Z; Zhang, GS; Deng, FX; Wang, L; Han, W; Zhang, Y	Green synthesis of hydrophilic activated carbon supported sulfide nZVI for enhanced Pb(II) scavenging from water: Characterization, kinetics, isotherms and mechanisms	JOURNAL OF HAZARDOUS MATERIALS	Article	Northeast Agricultural University - China; Qingdao Agricultural University; Harbin Institute of Technology	0304-3894	2021	10.1016/j.jhazmat.2020.123607
Hua, FY; Bruijnzeel, LA; Meli, P; Martin, PA; Zhang, J; Nakagawa, S; Miao, XR; Wang, WY; McEvoy, C; Peña-Arancibia, JL; Brancalion, PHS; Smith, P; Edwards, DP; Balmford, A	The biodiversity and ecosystem service contributions and trade-offs of forest restoration approaches	SCIENCE	Article	Peking University; Peking University; University of Cambridge; University of London; King's College London; Yunnan University; Universidade de Sao Paulo; Universidad de La Frontera; Basque Centre for Climate Change (BC3); Netherlands Organization Applied Science Research; University of New South Wales Sydney; University of New South Wales Sydney; Commonwealth Scientific & Industrial Research Orga…	0036-8075	2022	10.1126/science.abl4649
Lal, R; Bouma, J; Brevik, E; Dawson, L; Field, DJ; Glaser, B; Hatano, R; Hartemink, AE; Kosaki, T; Lascelles, B; Monger, C; Muggler, C; Ndzana, GM; Norra, S; Pan, XC; Paradelo, R; Reyes-Sánchez, LB; Sandén, T; Singh, BR; Spiegel, H; Yanai, J; Zhang, JB	Soils and sustainable development goals of the United Nations: An International Union of Soil Sciences perspective	GEODERMA REGIONAL	Article	University System of Ohio; Ohio State University; Wageningen University & Research; James Hutton Institute; University of Sydney; University of Sydney; Martin Luther University Halle Wittenberg; Hokkaido University; University of Wisconsin System; University of Wisconsin Madison; New Mexico State University; Universidade Federal de Vicosa; Helmholtz Association; Karlsruhe Institute of Technology;…	2352-0094	2021	10.1016/j.geodrs.2021.e00398
Qu, JH; Xu, Y; Zhang, XB; Sun, MZ; Tao, Y; Zhang, XM; Zhang, GS; Ge, CJ; Zhang, Y	Ball milling-assisted preparation of N-doped biochar loaded with ferrous sulfide as persulfate activator for phenol degradation: Multiple active sites-triggered radical/non-radical mechanism	APPLIED CATALYSIS B-ENVIRONMENTAL	Article	Northeast Agricultural University - China; Hainan University; Harbin Institute of Technology; Qingdao Agricultural University	0926-3373	2022	10.1016/j.apcatb.2022.121639
Chang, JF; Ciais, P; Gasser, T; Smith, P; Herrero, M; Havlík, P; Obersteiner, M; Guenet, B; Goll, DS; Li, W; Naipal, V; Peng, SS; Qiu, CJ; Tian, HQ; Viovy, N; Yue, C; Zhu, D	Climate warming from managed grasslands cancels the cooling effect of carbon sinks in sparsely grazed and natural grasslands	NATURE COMMUNICATIONS	Article	UDICE-French Research Universities; Universite Paris Saclay; CEA; Centre National de la Recherche Scientifique (CNRS); Universite Paris Cite; International Institute for Applied Systems Analysis (IIASA); Zhejiang University; University of Aberdeen; Commonwealth Scientific & Industrial Research Organisation (CSIRO); University of Munich; Peking University; Auburn University System; Auburn Universi…		2021	10.1038/s41467-020-20406-7
Chen, LY; Fang, K; Wei, B; Qin, SQ; Feng, XH; Hu, TY; Ji, CJ; Yang, YH	Soil carbon persistence governed by plant input and mineral protection at regional and global scales	ECOLOGY LETTERS	Article	Chinese Academy of Sciences; Institute of Botany, CAS; Chinese Academy of Sciences; University of Chinese Academy of Sciences, CAS; Peking University; Peking University	1461-023X	2021	10.1111/ele.13723
Feng, JG; Zhu, B	Global patterns and associated drivers of priming effect in response to nutrient addition	SOIL BIOLOGY & BIOCHEMISTRY	Article	Peking University; Peking University	0038-0717	2021	10.1016/j.soilbio.2020.108118
Muhammad, I; Wang, J; Sainju, UM; Zhang, SH; Zhao, FZ; Khan, A	Cover cropping enhances soil microbial biomass and affects microbial community structure: A meta-analysis	GEODERMA	Article	Ministry of Water Resources; Chinese Academy of Sciences; Institute of Soil & Water Conservation (ISWC), CAS; Northwest University Xi'an; United States Department of Agriculture (USDA)	0016-7061	2021	10.1016/j.geoderma.2020.114696
Cheng, HR; Zhu, LK; Meng, JJ	Fuzzy evaluation of the ecological security of land resources in mainland China based on the Pressure-State-Response framework	SCIENCE OF THE TOTAL ENVIRONMENT	Article	Peking University; Linyi University	0048-9697	2022	10.1016/j.scitotenv.2021.150053
Wang, XD; Chang, VWC; Li, ZW; Chen, Z; Wang, Y	Co-pyrolysis of sewage sludge and organic fractions of municipal solid waste: Synergistic effects on biochar properties and the environmental risk of heavy metals	JOURNAL OF HAZARDOUS MATERIALS	Article	Chinese Academy of Sciences; Institute of Urban Environment, CAS; Monash University	0304-3894	2021	10.1016/j.jhazmat.2021.125200
Bezak, N; Mikos, M; Borrelli, P; Alewell, C; Alvarez, P; Anache, JAA; Baartman, J; Ballabio, C; Biddoccu, M; Cerdà, A; Chalise, D; Chen, SC; Chen, W; De Girolamo, AM; Gessesse, GD; Deumlich, D; Diodato, N; Efthimiou, N; Erpul, G; Fiener, P; Freppaz, M; Gentile, F; Gericke, A; Haregeweyn, N; Hu, BF; Jeanneau, A; Kaffas, K; Kiani-Harchegani, M; Villuendas, IL; Li, CJ; Lombardo, L; López-Vicente, M;…	Soil erosion modelling: A bibliometric analysis	ENVIRONMENTAL RESEARCH	Article	University of Ljubljana; University of Pavia; Kangwon National University; University of Basel; Helmholtz Association; Karlsruhe Institute of Technology; Universidade de Sao Paulo; Universidade Federal de Mato Grosso do Sul; Wageningen University & Research; European Commission Joint Research Centre; EC JRC ISPRA Site; Consiglio Nazionale delle Ricerche (CNR); University of Valencia; University o…	0013-9351	2021	10.1016/j.envres.2021.111087
Ciais, P; Yao, YT; Gasser, T; Baccini, A; Wang, YL; Lauerwald, R; Peng, SS; Bastos, A; Li, W; Raymond, PA; Canadell, JG; Peters, GP; Andres, RJ; Chang, JF; Yue, C; Dolman, AJ; Haverd, V; Hartmann, J; Laruelle, G; Konings, AG; King, AW; Liu, Y; Luyssaert, S; Maignan, F; Patra, PK; Peregon, A; Regnier, P; Pongratz, J; Poulter, B; Shvidenko, A; Valentini, R; Wang, R; Broquet, G; Yin, Y; Zscheischler…	Empirical estimates of regional carbon budgets imply reduced global soil heterotrophic respiration	NATIONAL SCIENCE REVIEW	Article	UDICE-French Research Universities; Universite Paris Saclay; CEA; Centre National de la Recherche Scientifique (CNRS); Peking University; International Institute for Applied Systems Analysis (IIASA); Woods Hole Research Center; Chinese Academy of Sciences; Institute of Geographic Sciences & Natural Resources Research, CAS; Universite Libre de Bruxelles; University of Munich; Tsinghua University; …	2095-5138	2021	10.1093/nsr/nwaa145
Zhou, YQ; Sun, BY; Xie, BH; Feng, K; Zhang, ZJ; Zhang, Z; Li, SZ; Du, XF; Zhang, Q; Gu, SS; Song, W; Wang, LL; Xia, JY; Han, GX; Deng, Y	Warming reshaped the microbial hierarchical interactions	GLOBAL CHANGE BIOLOGY	Article	Shandong University; Chinese Academy of Sciences; Yantai Institute of Coastal Zone Research, CAS; East China Normal University; Chinese Academy of Sciences; Chinese Academy of Sciences; Dalian University of Technology; Dalian University of Technology; Chinese Academy of Sciences; University of Chinese Academy of Sciences, CAS	1354-1013	2021	10.1111/gcb.15891
Qu, JH; Tian, X; Zhang, XB; Yao, JY; Xue, JQ; Li, KG; Zhang, B; Wang, L; Zhang, Y	Free radicals-triggered reductive and oxidative degradation of highly chlorinated compounds via regulation of heat-activated persulfate by low-molecular-weight organic acids	APPLIED CATALYSIS B-ENVIRONMENTAL	Article	Northeast Agricultural University - China; Peking University	0926-3373	2022	10.1016/j.apcatb.2022.121359
Feng, Z; Jin, XR; Chen, TQ; Wu, JS	Understanding trade-offs and synergies of ecosystem services to support the decision-making in the Beijing?Tianjin?Hebei region	LAND USE POLICY	Article	China University of Geosciences; Peking University	0264-8377	2021	10.1016/j.landusepol.2021.105446
Ambade, B; Sethi, SS; Chintalacheruvu, MR	Distribution, risk assessment, and source apportionment of polycyclic aromatic hydrocarbons (PAHs) using positive matrix factorization (PMF) in urban soils of East India	ENVIRONMENTAL GEOCHEMISTRY AND HEALTH	Article	National Institute of Technology (NIT System); National Institute of Technology Jamshedpur; National Institute of Technology (NIT System); National Institute of Technology Jamshedpur	0269-4042	2023	10.1007/s10653-022-01223-x
Azeem, M; Ali, A; Jeyasundar, PGSA; Li, YM; Abdelrahman, H; Latif, A; Li, RH; Basta, N; Li, G; Shaheen, SM; Rinklebe, J; Zhang, ZQ	Bone-derived biochar improved soil quality and reduced Cd and Zn phytoavailability in a multi-metal contaminated mining soil	ENVIRONMENTAL POLLUTION	Article	Northwest A&F University - China; Chinese Academy of Sciences; Institute of Urban Environment, CAS; Chinese Academy of Sciences; Xi'an University of Architecture & Technology; Egyptian Knowledge Bank (EKB); Cairo University; Anhui Agricultural University; University System of Ohio; Ohio State University; University of Wuppertal; King Abdulaziz University; Egyptian Knowledge Bank (EKB); Kafrelshei…	0269-7491	2021	10.1016/j.envpol.2021.116800
Poyatos, R; Granda, V; Flo, V; Adams, MA; Adorján, B; Aguadé, D; Aidar, MPM; Allen, S; Alvarado-Barrientos, MS; Anderson-Teixeira, KJ; Aparecido, LM; Arain, MA; Aranda, I; Asbjornsen, H; Baxter, R; Beamesderfer, E; Berry, ZC; Berveiller, D; Blakely, B; Boggs, J; Bohrer, G; Bolstad, P; Bonal, D; Bracho, R; Brito, P; Brodeur, J; Casanoves, F; Chave, J; Chen, H; Cisneros, C; Clark, K; Cremonese, E; …	Global transpiration data from sap flow measurements: the SAPFLUXNET database	EARTH SYSTEM SCIENCE DATA	Article	Centro de Investigacion Ecologica y Aplicaciones Forestales (CREAF-CERCA); Autonomous University of Barcelona; Swinburne University of Technology; University of Sydney; University of Debrecen; Instituto de Botanica - Sao Paulo; Nevada System of Higher Education (NSHE); University of Nevada Reno; Instituto de Ecologia - Mexico; Smithsonian Institution; Smithsonian Tropical Research Institute; Smit…	1866-3508	2021	10.5194/essd-13-2607-2021
Feng, JG; He, KY; Zhang, QF; Han, MG; Zhu, B	Changes in plant inputs alter soil carbon and microbial communities in forest ecosystems	GLOBAL CHANGE BIOLOGY	Article	Peking University; Peking University	1354-1013	2022	10.1111/gcb.16107
Feng, JG; Tang, M; Zhu, B	Soil priming effect and its responses to nutrient addition along a tropical forest elevation gradient	GLOBAL CHANGE BIOLOGY	Article	Peking University; Peking University	1354-1013	2021	10.1111/gcb.15587
Yang, Q; Yang, ZF; Filippelli, GM; Ji, JF; Ji, WB; Liu, X; Wang, L; Yu, T; Wu, TS; Zhuo, XX; Zhang, QZ	Distribution and secondary enrichment of heavy metal elements in karstic soils with high geochemical background in Guangxi, China	CHEMICAL GEOLOGY	Article	China University of Geosciences; Indiana University System; Indiana University-Purdue University Indianapolis; Indiana University System; Indiana University-Purdue University Indianapolis; Indiana University System; Indiana University Bloomington; Nanjing University; China University of Geosciences	0009-2541	2021	10.1016/j.chemgeo.2021.120081
Li, ZH; Xia, J; Deng, XZ; Yan, HM	Multilevel modelling of impacts of human and natural factors on ecosystem services change in an oasis, Northwest China	RESOURCES CONSERVATION AND RECYCLING	Article	Chinese Academy of Sciences; Institute of Geographic Sciences & Natural Resources Research, CAS; Chinese Academy of Sciences; Chinese Academy of Sciences; University of Chinese Academy of Sciences, CAS; Wuhan University; Chinese Academy of Sciences; Hebei GEO University	0921-3449	2021	10.1016/j.resconrec.2021.105474
Cui, YX; Moorhead, DL; Guo, XB; Peng, SS; Wang, YQ; Zhang, XC; Fang, LC	Stoichiometric models of microbial metabolic limitation in soil systems	GLOBAL ECOLOGY AND BIOGEOGRAPHY	Article	Chinese Academy of Sciences; Institute of Soil & Water Conservation (ISWC), CAS; Chinese Academy of Sciences; University of Chinese Academy of Sciences, CAS; Peking University; University System of Ohio; University of Toledo; Chinese Academy of Sciences	1466-822X	2021	10.1111/geb.13378
Huang, YY; Ciais, P; Luo, YQ; Zhu, D; Wang, YP; Qiu, CJ; Goll, DS; Guenet, B; Makowski, D; De Graaf, I; Leifeld, J; Kwon, MJ; Hu, J; Qu, LY	Tradeoff of CO2 and CH4 emissions from global peatlands under water-table drawdown	NATURE CLIMATE CHANGE	Article	UDICE-French Research Universities; Universite Paris Saclay; CEA; Centre National de la Recherche Scientifique (CNRS); Universite Paris Cite; Commonwealth Scientific & Industrial Research Organisation (CSIRO); Northern Arizona University; UDICE-French Research Universities; Universite PSL; Ecole Normale Superieure (ENS); Centre National de la Recherche Scientifique (CNRS); CNRS - National Institu…	1758-678X	2021	10.1038/s41558-021-01059-w
Piao, SL; Yue, C; Ding, JZ; Guo, ZT	Perspectives on the role of terrestrial ecosystems in the 'carbon neutrality' strategy	SCIENCE CHINA-EARTH SCIENCES	Article	Peking University; Chinese Academy of Sciences; Institute of Tibetan Plateau Research, CAS; Northwest A&F University - China; Chinese Academy of Sciences; Institute of Soil & Water Conservation (ISWC), CAS; Chinese Academy of Sciences; Institute of Geology & Geophysics, CAS	1674-7313	2022	10.1007/s11430-022-9926-6
Salomón, RL; Peters, RL; Zweifel, R; Sass-Klaassen, UGW; Stegehuis, AI; Smiljanic, M; Poyatos, R; Babst, F; Cienciala, E; Fonti, P; Lerink, BJW; Lindner, M; Martinez-Vilalta, J; Mencuccini, M; Nabuurs, GJ; van der Maaten, E; von Arx, G; Bär, A; Akhmetzyanov, L; Balanzategui, D; Bellan, M; Bendix, J; Berveiller, D; Blazenec, M; Cada, V; Carraro, V; Cecchini, S; Chan, T; Conedera, M; Delpierre, N; …	The 2018 European heatwave led to stem dehydration but not to consistent growth reductions in forests	NATURE COMMUNICATIONS	Article	Ghent University; Universidad Politecnica de Madrid; Swiss Federal Institutes of Technology Domain; Swiss Federal Institute for Forest, Snow & Landscape Research; Wageningen University & Research; Czech University of Life Sciences Prague; Ernst Moritz Arndt Universitat Greifswald; Centro de Investigacion Ecologica y Aplicaciones Forestales (CREAF-CERCA); Autonomous University of Barcelona; Univer…		2022	10.1038/s41467-021-27579-9
Zhang, ZP; Ding, JL; Zhu, CM; Wang, JZ; Ma, GL; Ge, XY; Li, ZS; Han, LJ	Strategies for the efficient estimation of soil organic matter in salt-affected soils through Vis-NIR spectroscopy: Optimal band combination algorithm and spectral degradation	GEODERMA	Article	Xinjiang University; Xinjiang University; Shenzhen University; Shenzhen University; Shenzhen University	0016-7061	2021	10.1016/j.geoderma.2020.114729
Wu, LW; Zhang, Y; Guo, X; Ning, DL; Zhou, XS; Feng, JJ; Yuan, MM; Liu, S; Guo, JJ; Gao, ZP; Ma, J; Kuang, JL; Jian, SY; Han, S; Yang, ZF; Ouyang, Y; Fu, Y; Xiao, NJ; Liu, XD; Wu, LY; Zhou, AF; Yang, YF; Tiedje, JM; Zhou, JZ	Reduction of microbial diversity in grassland soil is driven by long-term climate warming	NATURE MICROBIOLOGY	Article	Peking University; University of Oklahoma System; University of Oklahoma - Norman; University of Oklahoma System; University of Oklahoma - Norman; Tsinghua University; Central South University; University of California System; University of California Berkeley; Hunan Academy of Agricultural Sciences; Hunan Agricultural University; China University of Geosciences; Michigan State University; Univer…	2058-5276	2022	10.1038/s41564-022-01147-3
Zhang, YX; Li, X; Xiao, M; Feng, ZY; Yu, YX; Yao, HY	Effects of microplastics on soil carbon dioxide emissions and the microbial functional genes involved in organic carbon decomposition in agricultural soil	SCIENCE OF THE TOTAL ENVIRONMENT	Article	Wuhan Institute of Technology; Chinese Academy of Sciences; Institute of Urban Environment, CAS; Chinese Academy of Sciences	0048-9697	2022	10.1016/j.scitotenv.2021.150714
Cui, XQ; Zhou, F; Ciais, P; Davidson, EA; Tubiello, FN; Niu, XY; Ju, XT; Canadell, JG; Bouwman, AF; Jackson, RB; Mueller, ND; Zheng, XH; Kanter, DR; Tian, HQ; Adalibieke, W; Bo, Y; Wang, QH; Zhan, XY; Zhu, DQ	Global mapping of crop-specific emission factors highlights hotspots of nitrous oxide mitigation	NATURE FOOD	Article	Peking University; UDICE-French Research Universities; Universite Paris Saclay; CEA; Centre National de la Recherche Scientifique (CNRS); University System of Maryland; University of Maryland Center for Environmental Science; Food & Agriculture Organization of the United Nations (FAO); Pennsylvania Commonwealth System of Higher Education (PCSHE); Pennsylvania State University; Hainan University; …		2021	10.1038/s43016-021-00384-9
Ning, QS; Hättenschwiler, S; Lü, XT; Kardol, P; Zhang, YH; Wei, CZ; Xu, CY; Huang, JH; Li, A; Yang, J; Wang, J; Peng, Y; Peñuelas, J; Sardans, J; He, JZ; Xu, ZH; Gao, YZ; Han, XG	Carbon limitation overrides acidification in mediating soil microbial activity to nitrogen enrichment in a temperate grassland	GLOBAL CHANGE BIOLOGY	Article	Chinese Academy of Sciences; Institute of Botany, CAS; Griffith University; UDICE-French Research Universities; Universite PSL; Ecole Pratique des Hautes Etudes (EPHE); Institut Agro; Montpellier SupAgro; CIRAD; Centre National de la Recherche Scientifique (CNRS); Institut de Recherche pour le Developpement (IRD); Universite Paul-Valery; Universite de Montpellier; Chinese Academy of Sciences; She…	1354-1013	2021	10.1111/gcb.15819
Ge, XY; Ding, JL; Teng, DX; Wang, JZ; Huo, TC; Jin, XY; Wang, JJ; He, BZ; Han, LJ	Updated soil salinity with fine spatial resolution and high accuracy: The synergy of Sentinel-2 MSI, environmental covariates and hybrid machine learning approaches	CATENA	Article	Xinjiang University; Xinjiang University; Chinese Academy of Sciences; Shenyang Institute of Applied Ecology, CAS; Shenzhen University; China Agricultural University	0341-8162	2022	10.1016/j.catena.2022.106054
Liu, X; Xu, YY; Engel, BA; Sun, SK; Zhao, XN; Wu, PT; Wang, YB	The impact of urbanization and aging on food security in developing countries: The view from Northwest China	JOURNAL OF CLEANER PRODUCTION	Article	Northwest A&F University - China; Northwest A&F University - China; Northwest A&F University - China; Purdue University System; Purdue University West Lafayette Campus; Purdue University	0959-6526	2021	10.1016/j.jclepro.2021.126067
Xiao, ML; Ding, JN; Luo, Y; Zhang, HQ; Yu, YX; Yao, HY; Zhu, ZK; Chadwick, DR; Jones, D; Chen, JP; Ge, TD	Microplastics shape microbial communities affecting soil organic matter decomposition in paddy soil	JOURNAL OF HAZARDOUS MATERIALS	Article	Ningbo University; Zhejiang University; Chinese Academy of Sciences; Chinese Academy of Sciences; Institute of Urban Environment, CAS; Bangor University	0304-3894	2022	10.1016/j.jhazmat.2022.128589
Shang, ZY; Abdalla, M; Xia, LL; Zhou, F; Sun, WJ; Smith, P	Can cropland management practices lower net greenhouse emissions without compromising yield?	GLOBAL CHANGE BIOLOGY	Article	University of Aberdeen; Chinese Academy of Agricultural Sciences; Institute of Crop Sciences, CAAS; Helmholtz Association; Karlsruhe Institute of Technology; Peking University; Chinese Academy of Sciences; Institute of Botany, CAS	1354-1013	2021	10.1111/gcb.15796
Chen, DS; Jiang, PH; Li, MC	Assessing potential ecosystem service dynamics driven by urbanization in the Yangtze River Economic Belt, China	JOURNAL OF ENVIRONMENTAL MANAGEMENT	Article	Nanjing University; Nanjing University	0301-4797	2021	10.1016/j.jenvman.2021.112734
Yang, J; Sun, P; Zhang, X; Wei, XY; Huang, YP; Du, WN; Qadeer, A; Liu, M; Huang, Y	Source apportionment of PAHs in roadside agricultural soils of a megacity using positive matrix factorization receptor model and compound-specific carbon isotope analysis	JOURNAL OF HAZARDOUS MATERIALS	Article	East China Normal University	0304-3894	2021	10.1016/j.jhazmat.2020.123592
Solís, RR; Dinc, O; Fang, GD; Nadagouda, MN; Dionysiou, DD	Activation of inorganic peroxides with magnetic graphene for the removal of antibiotics from wastewater	ENVIRONMENTAL SCIENCE-NANO	Article	University System of Ohio; University of Cincinnati; Chinese Academy of Sciences; Institute of Soil Science, CAS; United States Environmental Protection Agency	2051-8153	2021	10.1039/d0en01280g
Wang, C; Zhan, JY; Zhang, F; Liu, W; Twumasi-Ankrah, MJ	Analysis of urban carbon balance based on land use dynamics in the Beijing-Tianjin-Hebei region, China	JOURNAL OF CLEANER PRODUCTION	Article	Beijing Normal University; Chinese Academy of Sciences; Institute of Geographic Sciences & Natural Resources Research, CAS	0959-6526	2021	10.1016/j.jclepro.2020.125138
Li, ZL; Tang, Z; Song, ZP; Chen, WN; Tian, DS; Tang, SM; Wang, XY; Wang, JS; Liu, WJ; Wang, Y; Li, J; Jiang, LF; Luo, YQ; Niu, SL	Variations and controlling factors of soil denitrification rate	GLOBAL CHANGE BIOLOGY	Article	Southwest University - China; Chinese Academy of Agricultural Sciences; Institute of Plant Protection, CAAS; Southwest University - China; Chinese Academy of Sciences; Institute of Geographic Sciences & Natural Resources Research, CAS; Northern Arizona University; Shandong Agricultural University; Peking University; Peking University; Chinese Academy of Sciences; University of Chinese Academy of …	1354-1013	2022	10.1111/gcb.16066
Liu, K; Li, FB; Tian, QW; Nie, CR; Ma, YB; Zhu, ZL; Fang, LP; Huang, YY; Liu, SW	A highly porous animal bone-derived char with a superiority of promoting nZVI for Cr(VI) sequestration in agricultural soils	JOURNAL OF ENVIRONMENTAL SCIENCES	Article	Guangdong Academy of Sciences; Institute of Eco-environmental & Soil Sciences, Guangdong Academy of Sciences; Foshan University; Macau University of Science & Technology	1001-0742	2021	10.1016/j.jes.2020.11.031
Sha, ZY; Bai, YF; Li, RR; Lan, H; Zhang, XL; Li, JT; Liu, XF; Chang, SJ; Xie, YC	The global carbon sink potential of terrestrial vegetation can be increased substantially by optimal land management	COMMUNICATIONS EARTH & ENVIRONMENT	Article	Wuhan University; Chinese Academy of Sciences; Institute of Botany, CAS; Shenyang Jianzhu University; University System of Maryland; University of Maryland College Park; Shanghai University of Finance & Economics; University of Waterloo; Shanghai University; Eastern Michigan University		2022	10.1038/s43247-021-00333-1
Ding, TH; Chen, JF; Fang, Z; Chen, JY	Assessment of coordinative relationship between comprehensive ecosystem service and urbanization: A case study of Yangtze River Delta urban Agglomerations, China	ECOLOGICAL INDICATORS	Article	Hohai University; Hohai University; Hohai University; Suzhou University of Science & Technology; Tianjin University	1470-160X	2021	10.1016/j.ecolind.2021.108454
Feng, XM; Fu, BJ; Zhang, Y; Pan, NQ; Zeng, ZZ; Tian, HQ; Lyu, Y; Chen, YZ; Ciais, P; Wang, YP; Zhang, L; Cheng, L; Maestre, FT; Fernández-Martínez, M; Sardans, J; Peñuelas, J	Recent leveling off of vegetation greenness and primary production reveals the increasing soil water limitations on the greening Earth	SCIENCE BULLETIN	Article	Chinese Academy of Sciences; Research Center for Eco-Environmental Sciences (RCEES); Chinese Academy of Sciences; University of Chinese Academy of Sciences, CAS; Beijing Normal University; Auburn University System; Auburn University; Southern University of Science & Technology; UDICE-French Research Universities; Universite Paris Saclay; CEA; Centre National de la Recherche Scientifique (CNRS); C…	2095-9273	2021	10.1016/j.scib.2021.02.023
Li, PY; Wang, ZH	Environmental co-benefits of urban greening for mitigating heat and carbon emissions	JOURNAL OF ENVIRONMENTAL MANAGEMENT	Article	Arizona State University; Arizona State University-Tempe	0301-4797	2021	10.1016/j.jenvman.2021.112963
Zhang, LW; Zhang, SB; Xia, XH; Battin, TJ; Liu, SD; Wang, QR; Liu, R; Yang, ZF; Ni, JR; Stanley, EH	Unexpectedly minor nitrous oxide emissions from fluvial networks draining permafrost catchments of the East Qinghai-Tibet Plateau	NATURE COMMUNICATIONS	Article	Beijing Normal University; Beijing Normal University; Guangdong University of Technology; Swiss Federal Institutes of Technology Domain; Ecole Polytechnique Federale de Lausanne; Beijing Jiaotong University; Peking University; University of Wisconsin System; University of Wisconsin Madison; Peking University		2022	10.1038/s41467-022-28651-8
Gurmesa, GA; Wang, A; Li, SL; Peng, SS; de Vries, W; Gundersen, P; Ciais, P; Phillips, OL; Hobbie, EA; Zhu, WX; Nadelhoffer, K; Xi, Y; Bai, E; Sun, T; Chen, DX; Zhou, WJ; Zhang, YP; Guo, YR; Zhu, JJ; Duan, L; Li, DJ; Koba, K; Du, EZ; Zhou, GY; Han, XG; Han, SJ; Fang, YT	Retention of deposited ammonium and nitrate and its impact on the global forest carbon sink	NATURE COMMUNICATIONS	Article	Chinese Academy of Sciences; Shenyang Institute of Applied Ecology, CAS; Chinese Academy of Sciences; Jilin Academy of Agricultural Sciences; Peking University; Wageningen University & Research; University of Copenhagen; University of Leeds; University System Of New Hampshire; University of New Hampshire; State University of New York (SUNY) System; State University of New York (SUNY) Binghamton; …		2022	10.1038/s41467-022-28345-1
Li, JY; Zhang, C; Zhu, SH	Relative contributions of climate and land-use change to ecosystem services in arid inland basins	JOURNAL OF CLEANER PRODUCTION	Article	Chinese Academy of Sciences; Xinjiang Institute of Ecology & Geography, CAS; Chinese Academy of Sciences; University of Chinese Academy of Sciences, CAS; Chinese Academy of Sciences; Linyi University	0959-6526	2021	10.1016/j.jclepro.2021.126844
Yu, YX; Li, X; Feng, ZY; Xiao, ML; Ge, TD; Li, YY; Yao, HY	Polyethylene microplastics alter the microbial functional gene abundances and increase nitrous oxide emissions from paddy soils	JOURNAL OF HAZARDOUS MATERIALS	Article	Chinese Academy of Sciences; Institute of Urban Environment, CAS; Wuhan Institute of Technology; Ningbo University	0304-3894	2022	10.1016/j.jhazmat.2022.128721
Han, MG; Chen, Y; Li, R; Yu, M; Fu, LC; Li, SF; Su, JR; Zhu, B	Root phosphatase activity aligns with the collaboration gradient of the root economics space	NEW PHYTOLOGIST	Article	Peking University; Peking University; Chinese Academy of Forestry	0028-646X	2022	10.1111/nph.17906
Jia, YF; Zhai, GQ; Zhu, SS; Liu, XJ; Schmid, B; Wang, ZH; Ma, KP; Feng, XJ	Plant and microbial pathways driving plant diversity effects on soil carbon accumulation in subtropical forest	SOIL BIOLOGY & BIOCHEMISTRY	Article	Chinese Academy of Sciences; Institute of Botany, CAS; Chinese Academy of Sciences; University of Chinese Academy of Sciences, CAS; University of Zurich; Peking University; Peking University	0038-0717	2021	10.1016/j.soilbio.2021.108375
Li, JY; Chen, X; Kurban, A; Van de Voorde, T; De Maeyer, P; Zhang, C	Coupled SSPs-RCPs scenarios to project the future dynamic variations of water-soil-carbon-biodiversity services in Central Asia	ECOLOGICAL INDICATORS	Article	Chinese Academy of Sciences; Xinjiang Institute of Ecology & Geography, CAS; Chinese Academy of Sciences; University of Chinese Academy of Sciences, CAS; Ghent University; Ghent University; Chinese Academy of Sciences; Linyi University	1470-160X	2021	10.1016/j.ecolind.2021.107936
Cheng, MT; Tang, GQ; Lv, B; Li, XR; Wu, XR; Wang, YM; Wang, YS	Source apportionment of PM2.5 and visibility in Jinan, China	JOURNAL OF ENVIRONMENTAL SCIENCES	Article	Lanzhou University; Chinese Academy of Sciences; Institute of Atmospheric Physics, CAS; Chinese Academy of Sciences; Institute of Urban Environment, CAS; Capital Normal University	1001-0742	2021	10.1016/j.jes.2020.09.012
Xu, YH; Ou, Q; He, Q; Wu, ZS; Ma, J; Huangfu, XL	Influence of dissolved black carbon on the aggregation and deposition of polystyrene nanoplastics: Comparison with dissolved humic acid	WATER RESEARCH	Article	Chongqing University; Delft University of Technology; Harbin Institute of Technology	0043-1354	2021	10.1016/j.watres.2021.117054
Gao, XF; Chen, HH; Gu, BH; Jeppesen, E; Xue, YY; Yang, J	Particulate organic matter as causative factor to eutrophication of subtropical deep freshwater: Role of typhoon (tropical cyclone) in the nutrient cycling	WATER RESEARCH	Article	Chinese Academy of Sciences; Institute of Urban Environment, CAS; Chinese Academy of Sciences; University of Chinese Academy of Sciences, CAS; State University System of Florida; University of Florida; Aarhus University; Middle East Technical University; Middle East Technical University; Middle East Technical University	0043-1354	2021	10.1016/j.watres.2020.116470
Xie, XD; Cheng, HF	Adsorption and desorption of phenylarsonic acid compounds on metal oxide and hydroxide, and clay minerals	SCIENCE OF THE TOTAL ENVIRONMENT	Article	Peking University; Hunan Agricultural University	0048-9697	2021	10.1016/j.scitotenv.2020.143765
Wei, XM; Hu, YJ; Cai, G; Yao, HY; Ye, J; Sun, Q; Veresoglou, SD; Li, YY; Zhu, ZK; Guggenberger, G; Chen, XB; Su, YR; Li, Y; Wu, JS; Ge, TD	Organic phosphorus availability shapes the diversity of phoD-harboring bacteria in agricultural soil	SOIL BIOLOGY & BIOCHEMISTRY	Article	Chinese Academy of Sciences; Institute of Subtropical Agriculture, CAS; Chinese Academy of Sciences; University of Chinese Academy of Sciences, CAS; Leibniz University Hannover; Chinese Academy of Sciences; Institute of Urban Environment, CAS; Chinese Academy of Sciences; Wuhan Institute of Technology; University of Queensland; Free University of Berlin	0038-0717	2021	10.1016/j.soilbio.2021.108364
Quan, Z; Zhang, X; Davidson, EA; Zhu, FF; Li, SL; Zhao, XH; Chen, X; Zhang, LM; He, JZ; Wei, WX; Fang, YT	Fates and Use Efficiency of Nitrogen Fertilizer in Maize Cropping Systems and Their Responses to Technologies and Management Practices: A Global Analysis on Field 15N Tracer Studies	EARTHS FUTURE	Article	Chinese Academy of Sciences; Shenyang Institute of Applied Ecology, CAS; University System of Maryland; University of Maryland Center for Environmental Science; Chinese Academy of Sciences; Chinese Academy of Sciences; Shenyang Institute of Applied Ecology, CAS; Chinese Academy of Sciences; Research Center for Eco-Environmental Sciences (RCEES); Chinese Academy of Sciences; Institute of Subtropic…		2021	10.1029/2020EF001514
Sun, Y; Li, M; Gu, XG; Danish, M; Shan, A; Ali, M; Qiu, ZF; Sui, Q; Lyu, SG	Mechanism of surfactant in trichloroethene degradation in aqueous solution by sodium persulfate activated with chelated-Fe(II)	JOURNAL OF HAZARDOUS MATERIALS	Article	East China University of Science & Technology; University of Lahore	0304-3894	2021	10.1016/j.jhazmat.2020.124814
Li, JS; Guo, XM; Chuai, XW; Xie, FJ; Yang, F; Gao, RY; Ji, XP	Reexamine China's terrestrial ecosystem carbon balance under land use-type and climate change	LAND USE POLICY	Article	Nanjing University; Chinese Academy of Sciences; Institute of Geographic Sciences & Natural Resources Research, CAS	0264-8377	2021	10.1016/j.landusepol.2020.105275
Li, HQ; Yao, YF; Zhang, XJ; Zhu, HS; Wei, XR	Changes in soil physical and hydraulic properties following the conversion of forest to cropland in the black soil region of Northeast China	CATENA	Article	Northwest A&F University - China; Northwest A&F University - China; Northwest University Xi'an; Chinese Academy of Sciences; University of Chinese Academy of Sciences, CAS	0341-8162	2021	10.1016/j.catena.2020.104986
Chen, Y; Liu, X; Hou, YH; Zhou, SR; Zhu, B	Particulate organic carbon is more vulnerable to nitrogen addition than mineral-associated organic carbon in soil of an alpine meadow	PLANT AND SOIL	Article	Peking University; Peking University; Fudan University	0032-079X	2021	10.1007/s11104-019-04279-4
Chen, X; Lin, JJ; Wang, P; Zhang, S; Liu, D; Zhu, B	Resistant soil carbon is more vulnerable to priming effect than active soil carbon	SOIL BIOLOGY & BIOCHEMISTRY	Article	Chongqing Three Gorges University; Chinese Academy of Sciences; Shenyang Institute of Applied Ecology, CAS; Zhejiang University; Peking University; Peking University	0038-0717	2022	10.1016/j.soilbio.2022.108619
Zhuang, QW; Shao, ZF; Li, DR; Huang, X; Cai, BW; Altan, O; Wu, SX	Unequal weakening of urbanization and soil salinization on vegetation production capacity	GEODERMA	Article	Wuhan University; Wuhan University; University of Arkansas System; University of Arkansas Fayetteville; Istanbul Technical University; Chinese Academy of Sciences; Xinjiang Institute of Ecology & Geography, CAS	0016-7061	2022	10.1016/j.geoderma.2022.115712
Gan, DY; Feng, JG; Han, MG; Zeng, H; Zhu, BA	Rhizosphere effects of woody plants on soil biogeochemical processes: A meta-analysis	SOIL BIOLOGY & BIOCHEMISTRY	Article	Peking University; Peking University; Peking University	0038-0717	2021	10.1016/j.soilbio.2021.108310
Zhang, QF; Cheng, L; Feng, JG; Mei, KC; Zeng, QX; Zhu, BA; Chen, YM	Nitrogen addition stimulates priming effect in a subtropical forest soil	SOIL BIOLOGY & BIOCHEMISTRY	Article	Peking University; Fujian Normal University; Fujian Normal University	0038-0717	2021	10.1016/j.soilbio.2021.108339
Li, SN; Zhu, CM; Lin, Y; Dong, BY; Chen, BJ; Si, B; Li, YJ; Deng, XD; Gan, MY; Zhang, J; Wang, K	Conflicts between agricultural and ecological functions and their driving mechanisms in agroforestry ecotone areas from the perspective of land use functions	JOURNAL OF CLEANER PRODUCTION	Article	Zhejiang University	0959-6526	2021	10.1016/j.jclepro.2021.128453
Schmid, MW; van Moorsel, SJ; Hahl, T; De Luca, E; De Deyn, GB; Wagg, C; Niklaus, PA; Schmid, B	Effects of plant community history, soil legacy and plant diversity on soil microbial communities	JOURNAL OF ECOLOGY	Article	University of Zurich; Wageningen University & Research; Agriculture & Agri Food Canada; University of Zurich; Peking University	0022-0477	2021	10.1111/1365-2745.13714
Azeem, M; Ali, A; Jeyasundar, PGSA; Bashir, S; Hussain, Q; Wahid, F; Ali, EF; Abdelrahman, H; Li, RH; Antoniadis, V; Rinklebe, J; Shaheen, SM; Li, G; Zhang, Z	Effects of sheep bone biochar on soil quality, maize growth, and fractionation and phytoavailability of Cd and Zn in a mining-contaminated soil	CHEMOSPHERE	Article	Chinese Academy of Sciences; Institute of Urban Environment, CAS; Chinese Academy of Sciences; Northwest A&F University - China; Xi'an University of Architecture & Technology; Arid Agriculture University; Taif University; Egyptian Knowledge Bank (EKB); Cairo University; University of Thessaly; University of Wuppertal; Shoolini University; King Abdulaziz University; Egyptian Knowledge Bank (EKB); …	0045-6535	2021	10.1016/j.chemosphere.2021.131016
Chen, LT; Jiang, L; Jing, X; Wang, JL; Shi, Y; Chu, HY; He, JS	Above- and belowground biodiversity jointly drive ecosystem stability in natural alpine grasslands on the Tibetan Plateau	GLOBAL ECOLOGY AND BIOGEOGRAPHY	Article	Chinese Academy of Sciences; Chinese Academy of Sciences; University System of Georgia; Georgia Institute of Technology; KU Leuven; Chinese Academy of Sciences; Institute of Soil Science, CAS; Peking University; Peking University; Lanzhou University; Lanzhou University	1466-822X	2021	10.1111/geb.13307
Yang, SS; Zhang, JH; Han, JQ; Wang, JW; Zhang, S; Bai, Y; Cao, D; Xun, L; Zheng, MX; Chen, H; Xu, C; Rong, YJ	Evaluating global ecosystem water use efficiency response to drought based on multi-model analysis	SCIENCE OF THE TOTAL ENVIRONMENT	Article	Chinese Academy of Sciences; Chinese Academy of Sciences; University of Chinese Academy of Sciences, CAS; Qingdao University; Tianjin University; Tianjin University; Chinese Academy of Sciences; Research Center for Eco-Environmental Sciences (RCEES); Chinese Academy of Sciences; University of Chinese Academy of Sciences, CAS	0048-9697	2021	10.1016/j.scitotenv.2021.146356
Zhang, XY; Jia, J; Chen, LT; Chu, HY; He, JS; Zhang, YJ; Feng, XJ	Aridity and NPP constrain contribution of microbial necromass to soil organic carbon in the Qinghai-Tibet alpine grasslands	SOIL BIOLOGY & BIOCHEMISTRY	Article	Chinese Academy of Sciences; Institute of Botany, CAS; Chinese Academy of Sciences; University of Chinese Academy of Sciences, CAS; Chinese Academy of Sciences; Chinese Academy of Sciences; Institute of Soil Science, CAS; Lanzhou University; Peking University; Chinese Academy of Sciences; Institute of Geographic Sciences & Natural Resources Research, CAS	0038-0717	2021	10.1016/j.soilbio.2021.108213
Wang, YF; Chen, P; Wang, FH; Han, WX; Qiao, M; Dong, WX; Hu, CS; Zhu, D; Chu, HY; Zhu, YG	The ecological clusters of soil organisms drive the ecosystem multifunctionality under long-term fertilization	ENVIRONMENT INTERNATIONAL	Article	Chinese Academy of Sciences; Research Center for Eco-Environmental Sciences (RCEES); Chinese Academy of Sciences; University of Chinese Academy of Sciences, CAS; Chinese Academy of Sciences; Wuhan Botanical Garden, CAS; Chinese Academy of Sciences; Institute of Genetics & Developmental Biology, CAS; Hebei Normal University; Chinese Academy of Sciences; Institute of Soil Science, CAS; Chinese Acad…	0160-4120	2022	10.1016/j.envint.2022.107133
He, QN; Ju, WM; Dai, SP; He, W; Song, L; Wang, SH; Li, XCA; Mao, GX	Drought Risk of Global Terrestrial Gross Primary Productivity Over the Last 40 Years Detected by a Remote Sensing-Driven Process Model	JOURNAL OF GEOPHYSICAL RESEARCH-BIOGEOSCIENCES	Article	Nanjing University; Huaiyin Normal University; Ministry of Natural Resources of the People's Republic of China; Nanjing University; Chinese Academy of Tropical Agricultural Sciences; Chinese Academy of Sciences; Institute of Soil Science, CAS	2169-8953	2021	10.1029/2020JG005944
Zhu, EX; Cao, ZJ; Jia, J; Liu, CZ; Zhang, ZH; Wang, H; Dai, GH; He, JS; Feng, XJ	Inactive and inefficient: Warming and drought effect on microbial carbon processing in alpine grassland at depth	GLOBAL CHANGE BIOLOGY	Article	Chinese Academy of Sciences; Institute of Botany, CAS; Chinese Academy of Sciences; University of Chinese Academy of Sciences, CAS; Chinese Academy of Sciences; Lanzhou University; Peking University	1354-1013	2021	10.1111/gcb.15541
Hughes, DD; Christiansen, MB; Milani, A; Vermeuel, MP; Novak, GA; Alwe, HD; Dickens, AF; Pierce, RB; Millet, DB; Bertram, TH; Stanier, CO; Stone, EA	PM2.5 chemistry, organosulfates, and secondary organic aerosol during the 2017 Lake Michigan Ozone Study	ATMOSPHERIC ENVIRONMENT	Article	University of Iowa; University of Iowa; University of Wisconsin System; University of Wisconsin Madison; University of Minnesota System; University of Minnesota Twin Cities; University of Wisconsin System; University of Wisconsin Madison	1352-2310	2021	10.1016/j.atmosenv.2020.117939
Dannenberg, MP; Yan, D; Barnes, ML; Smith, WK; Johnston, MR; Scott, RL; Biederman, JA; Knowles, JF; Wang, X; Duman, T; Litvak, ME; Kimball, JS; Williams, AP; Zhang, Y	Exceptional heat and atmospheric dryness amplified losses of primary production during the 2020 US Southwest hot drought	GLOBAL CHANGE BIOLOGY	Article	University of Iowa; University of Arizona; Indiana University System; Indiana University Bloomington; United States Department of Agriculture (USDA); University of New Mexico; University of Montana System; University of Montana; University of California System; University of California Los Angeles; Peking University	1354-1013	2022	10.1111/gcb.16214
Beyer, RM; Hua, FY; Martin, PA; Manica, A; Rademacher, T	Relocating croplands could drastically reduce the environmental impacts of global food production	COMMUNICATIONS EARTH & ENVIRONMENT	Article	University of Cambridge; Potsdam Institut fur Klimafolgenforschung; Peking University; Basque Centre for Climate Change (BC3); Harvard University; Northern Arizona University; Northern Arizona University; University of Quebec; University Quebec Outaouais		2022	10.1038/s43247-022-00360-6
Duan, CJ; Wang, YH; Wang, Q; Ju, WL; Zhang, ZQ; Cui, YX; Beiyuan, JZ; Fan, QH; Wei, SY; Li, SQ; Fang, LC	Microbial metabolic limitation of rhizosphere under heavy metal stress: Evidence from soil ecoenzymatic stoichiometry	ENVIRONMENTAL POLLUTION	Article	Chinese Academy of Sciences; Institute of Soil & Water Conservation (ISWC), CAS; Chinese Academy of Sciences; University of Chinese Academy of Sciences, CAS; Northwest A&F University - China; Tsinghua University; Peking University; Foshan University; Chinese Academy of Sciences	0269-7491	2022	10.1016/j.envpol.2022.118978
Chen, XF; Wang, JC; You, YM; Wang, RY; Chu, SH; Chi, YW; Hayat, K; Hui, N; Liu, XX; Zhang, D; Zhou, P	When nanoparticle and microbes meet: The effect of multi-walled carbon nanotubes on microbial community and nutrient cycling in hyperaccumulator system	JOURNAL OF HAZARDOUS MATERIALS	Article	Shanghai Jiao Tong University; Shanghai Jiao Tong University; Shanghai Jiao Tong University	0304-3894	2022	10.1016/j.jhazmat.2021.126947
Dai, ZM; Zang, HD; Chen, J; Fu, YY; Wang, XH; Liu, HT; Shen, CC; Wang, JJ; Kuzyakov, Y; Becker, JN; Hemp, A; Barberán, A; Gunina, A; Chen, HH; Luo, Y; Xu, JM	Metagenomic insights into soil microbial communities involved in carbon cycling along an elevation climosequences	ENVIRONMENTAL MICROBIOLOGY	Article	Zhejiang University; Zhejiang University; Zhejiang University; China Agricultural University; Chinese Academy of Forestry; Research Institute of Tropical Forestry, CAF; Chinese Academy of Sciences; Research Center for Eco-Environmental Sciences (RCEES); Chinese Academy of Sciences; Nanjing Institute of Geography & Limnology, CAS; University of Gottingen; University of Gottingen; Peoples Friendshi…	1462-2912	2021	10.1111/1462-2920.15655
Shen, CC; Wang, J; He, JZ; Yu, FH; Ge, Y	Plant Diversity Enhances Soil Fungal Diversity and Microbial Resistance to Plant Invasion	APPLIED AND ENVIRONMENTAL MICROBIOLOGY	Article	Chinese Academy of Sciences; Research Center for Eco-Environmental Sciences (RCEES); Chinese Academy of Sciences; University of Chinese Academy of Sciences, CAS; Taizhou University; University of Melbourne	0099-2240	2021	10.1128/AEM.00251-21
Chen, SC; Xu, HY; Xu, DY; Ji, WJ; Li, S; Yang, MH; Hu, BF; Zhou, Y; Wang, N; Arrouays, D; Shi, Z	Evaluating validation strategies on the performance of soil property prediction from regional to continental spectral data	GEODERMA	Article	Zhejiang University; INRAE; China Agricultural University; Central China Normal University; Jiangxi University of Finance & Economics; Zhejiang University; Ministry of Agriculture & Rural Affairs	0016-7061	2021	10.1016/j.geoderma.2021.115159
Lyu, P; Wang, GH; Cao, YL; Wang, B; Deng, NS	Phosphorus-modified biochar cross-linked MgeAl layered double-hydroxide composite for immobilizing uranium in mining contaminated soil	CHEMOSPHERE	Article	East China University of Technology; East China University of Technology; Northwest University Xi'an; Wuhan University	0045-6535	2021	10.1016/j.chemosphere.2021.130116
Lü, YH; Lu, D; Feng, XM; Fu, BJ	Multi-scale analyses on the ecosystem services in the Chinese Loess Plateau and implications for dryland	CURRENT OPINION IN ENVIRONMENTAL SUSTAINABILITY	Article	Chinese Academy of Sciences; Research Center for Eco-Environmental Sciences (RCEES); Chinese Academy of Sciences; University of Chinese Academy of Sciences, CAS	1877-3435	2021	10.1016/j.cosust.2020.08.001
Li, Z; Zhang, P; Qiu, Y; Zhang, ZH; Wang, X; Yu, YL; Feng, YJ	Biosynthetic FeS/BC hybrid particles enhanced the electroactive bacteria enrichment in microbial electrochemical systems	SCIENCE OF THE TOTAL ENVIRONMENT	Article	Harbin Institute of Technology; Harbin Institute of Technology; Kunming University of Science & Technology; Nankai University	0048-9697	2021	10.1016/j.scitotenv.2020.143142
Hao, LT; Liu, YJ; Chen, N; Hao, XD; Zhang, BG; Feng, CP	Microbial removal of vanadium (V) from groundwater by sawdust used as a sole carbon source	SCIENCE OF THE TOTAL ENVIRONMENT	Article	China University of Geosciences; Beijing University of Civil Engineering & Architecture	0048-9697	2021	10.1016/j.scitotenv.2020.142161
Ma, C; Chen, GG; Shi, JY; Zhou, HJ; Ren, WX; Du, YL	Improvement mechanism of water resistance and volume stability of magnesium oxychloride cement: A comparison study on the influences of various gypsum	SCIENCE OF THE TOTAL ENVIRONMENT	Article	Shenzhen University; Central South University; Shenzhen University; Shenzhen University	0048-9697	2022	10.1016/j.scitotenv.2022.154546
Alnahit, AO; Mishra, AK; Khan, AA	Stream water quality prediction using boosted regression tree and random forest models	STOCHASTIC ENVIRONMENTAL RESEARCH AND RISK ASSESSMENT	Article	Clemson University; King Saud University	1436-3240	2022	10.1007/s00477-021-02152-4
Su, XP; Zhou, Y; Li, Q	Designing Ecological Security Patterns Based on the Framework of Ecological Quality and Ecological Sensitivity: A Case Study of Jianghan Plain, China	INTERNATIONAL JOURNAL OF ENVIRONMENTAL RESEARCH AND PUBLIC HEALTH	Article	Central China Normal University; Central China Normal University		2021	10.3390/ijerph18168383
Li, WM; Cheng, C; He, L; Liu, M; Cao, GL; Yang, SS; Ren, NQ	Effects of feedstock and pyrolysis temperature of biochar on promoting hydrogen production of ethanol-type fermentation	SCIENCE OF THE TOTAL ENVIRONMENT	Article	Dalian University of Technology; Harbin Institute of Technology; Dalian University of Technology	0048-9697	2021	10.1016/j.scitotenv.2021.148206
Fang, LP; Xu, L; Deng, J; Gao, SX; Huang, LZ	Induced generation of hydroxyl radicals from green rust under oxic conditions by iron-phosphate complexes	CHEMICAL ENGINEERING JOURNAL	Article	Guangdong Academy of Sciences; Institute of Eco-environmental & Soil Sciences, Guangdong Academy of Sciences; Wuhan University; Chinese Academy of Sciences; University of Science & Technology of China, CAS	1385-8947	2021	10.1016/j.cej.2021.128780
Kang, HZ; Yu, WJ; Dutta, S; Gao, HH	Soil microbial community composition and function are closely associated with soil organic matter chemistry along a latitudinal gradient	GEODERMA	Article	Shanghai Jiao Tong University; Iowa State University; Iowa State University	0016-7061	2021	10.1016/j.geoderma.2020.114744
Brust, C; Kimball, JS; Maneta, MP; Jencso, K; He, MZ; Reichle, RH	Using SMAP Level-4 soil moisture to constrain MOD16 evapotranspiration over the contiguous USA	REMOTE SENSING OF ENVIRONMENT	Article	University of Montana System; University of Montana; University of Montana System; University of Montana; University of Montana System; University of Montana; Peking University; National Aeronautics & Space Administration (NASA); NASA Goddard Space Flight Center	0034-4257	2021	10.1016/j.rse.2020.112277
Tiedje, JM; Bruns, MA; Casadevall, A; Criddle, CS; Eloe-Fadrosh, E; Karl, DM; Nguyen, NK; Zhou, JZ	Microbes and Climate Change: a Research Prospectus for the Future	MBIO	Article	Michigan State University; Pennsylvania Commonwealth System of Higher Education (PCSHE); Pennsylvania State University; Pennsylvania State University - University Park; Johns Hopkins University; Johns Hopkins Bloomberg School of Public Health; Stanford University; United States Department of Energy (DOE); Lawrence Berkeley National Laboratory; University of Hawaii System; University of Hawaii Man…	2150-7511	2022	10.1128/mbio.00800-22
Li, XY; Wang, RC; Shao, CY; Li, DP; Bai, SW; Hou, N; Zhao, XY	Biochar and Hydrochar from Agricultural Residues for Soil Conditioning: Life Cycle Assessment and Microbially Mediated C and N Cycles	ACS SUSTAINABLE CHEMISTRY & ENGINEERING	Article	Northeast Agricultural University - China; Harbin Institute of Technology	2168-0485	2022	10.1021/acssuschemeng.1c08074
Karimi, JD; Corstanje, R; Harris, JA	Bundling ecosystem services at a high resolution in the UK: trade-offs and synergies in urban landscapes	LANDSCAPE ECOLOGY	Article	Cranfield University	0921-2973	2021	10.1007/s10980-021-01252-4
Huang, LQ; Liao, Q; Yan, JY; Liang, YT; Zhang, HR	Carbon footprint of oil products pipeline transportation	SCIENCE OF THE TOTAL ENVIRONMENT	Article	China University of Petroleum; Malardalen University; University of Tokyo	0048-9697	2021	10.1016/j.scitotenv.2021.146906
Ma, SH; Chen, GP; Tang, WG; Xing, AJ; Chen, X; Xiao, W; Zhou, LH; Zhu, JL; Li, YD; Zhu, BA; Fang, JY	Inconsistent responses of soil microbial community structure and enzyme activity to nitrogen and phosphorus additions in two tropical forests	PLANT AND SOIL	Article	Peking University; University of Leeds; Chinese Academy of Sciences; Institute of Botany, CAS; Chinese Academy of Forestry; Research Institute of Tropical Forestry, CAF	0032-079X	2021	10.1007/s11104-020-04805-9
Ariluoma, M; Ottelin, J; Hautamäki, R; Tuhkanen, EM; Mänttäri, M	Carbon sequestration and storage potential of urban green in residential yards: A case study from Helsinki	URBAN FORESTRY & URBAN GREENING	Article	Aalto University; Aalto University; Natural Resources Institute Finland (Luke); Natural Resources Institute Finland (Luke)	1618-8667	2021	10.1016/j.ufug.2020.126939
Li, JW; Dong, SC; Li, Y; Wang, YS; Li, ZH; Li, FJ	Effects of land use change on ecosystem services in the China-Mongolia-Russia economic corridor	JOURNAL OF CLEANER PRODUCTION	Article	Chinese Academy of Sciences; Institute of Geographic Sciences & Natural Resources Research, CAS; Chinese Academy of Sciences; University of Chinese Academy of Sciences, CAS; Beijing Normal University	0959-6526	2022	10.1016/j.jclepro.2022.132175
Gou, MM; Li, L; Ouyang, S; Shu, C; Xiao, WF; Wang, N; Hu, JW; Liu, CF	Integrating ecosystem service trade-offs and rocky desertification into ecological security pattern construction in the Daning river basin of southwest China	ECOLOGICAL INDICATORS	Article	Chinese Academy of Forestry; Central South University of Forestry & Technology; Beijing University of Civil Engineering & Architecture; Nanjing Forestry University	1470-160X	2022	10.1016/j.ecolind.2022.108845
Dar, MUD; Shah, AI; Bhat, SA; Kumar, R; Huisingh, D; Kaur, R	RETRACTED: Blue Green infrastructure as a tool for sustainable urban development (Retracted article. See vol. 367, 2022)	JOURNAL OF CLEANER PRODUCTION	Article; Retracted Publication	Punjab Agricultural University; Sher-e-Kashmir University of Agricultural Sciences & Technology of Kashmir (SKUAST Kashmir); University of Tennessee System; University of Tennessee Knoxville	0959-6526	2021	10.1016/j.jclepro.2021.128474
Wang, J; Zhang, SH; Sainju, UM; Ghimire, R; Zhao, FZ	A meta-analysis on cover crop impact on soil water storage, succeeding crop yield, and water-use efficiency	AGRICULTURAL WATER MANAGEMENT	Article	Ministry of Water Resources; Chinese Academy of Sciences; Institute of Soil & Water Conservation (ISWC), CAS; Northwest University Xi'an; United States Department of Agriculture (USDA); New Mexico State University	0378-3774	2021	10.1016/j.agwat.2021.107085
Dhanker, R; Chaudhary, S; Goyal, S; Garg, VK	Influence of urban sewage sludge amendment on agricultural soil parameters	ENVIRONMENTAL TECHNOLOGY & INNOVATION	Article	CCS Haryana Agricultural University; Central University of Punjab	2352-1864	2021	10.1016/j.eti.2021.101642
Chen, XY; Zhang, HJ; Yao, XD; Zeng, WJ; Wang, W	Latitudinal and depth patterns of soil microbial biomass carbon, nitrogen, and phosphorus in grasslands of an agro-pastoral ecotone	LAND DEGRADATION & DEVELOPMENT	Article	Peking University; Peking University; Fujian Normal University; Fujian Normal University	1085-3278	2021	10.1002/ldr.3978
Waqas, MA; Li, YE; Ashraf, MN; Ahmed, W; Wang, B; Sardar, MF; Ma, P; Li, RN; Wan, YF; Kuzyakov, Y	Long-term warming and elevated CO2 increase ammonia-oxidizing microbial communities and accelerate nitrification in paddy soil	APPLIED SOIL ECOLOGY	Article	Chinese Academy of Agricultural Sciences; Institute of Environment & Sustainable Development in Agriculture, CAAS; Chinese Academy of Agricultural Sciences; Institute of Agricultural Resources & Regional Planning, CAAS; Guangzhou University; University of Gottingen; Peoples Friendship University of Russia; Kazan Federal University	0929-1393	2021	10.1016/j.apsoil.2021.104063
Li, SN; He, YY; Xu, HL; Zhu, CM; Dong, BY; Lin, Y; Si, B; Deng, JS; Wang, K	Impacts of Urban Expansion Forms on Ecosystem Services in Urban Agglomerations: A Case Study of Shanghai-Hangzhou Bay Urban Agglomeration	REMOTE SENSING	Article	Zhejiang University		2021	10.3390/rs13101908
Zhang, P; Cao, C; Wang, YH; Yu, K; Liu, CX; He, C; Shi, Q; Wang, JJ	Chemodiversity of water-extractable organic matter in sediment columns of a polluted urban river in South China	SCIENCE OF THE TOTAL ENVIRONMENT	Article	Northwest Normal University - China; Southern University of Science & Technology; China University of Petroleum	0048-9697	2021	10.1016/j.scitotenv.2021.146127
Jain, S; Sharma, SK; Srivastava, MK; Chatterjee, A; Vijayan, N; Tripathy, SS; Kumari, KM; Mandal, TK; Sharma, C	Chemical characterization, source apportionment and transport pathways of PM2.5 and PM10 over Indo Gangetic Plain of India	URBAN CLIMATE	Article	Council of Scientific & Industrial Research (CSIR) - India; CSIR - National Physical Laboratory (NPL); Academy of Scientific & Innovative Research (AcSIR); Banaras Hindu University (BHU); Department of Science & Technology (India); Bose Institute; Dayalbagh Educational Institute (DEI)	2212-0955	2021	10.1016/j.uclim.2021.100805
Luo, RY; Kuzyakov, Y; Zhu, B; Qiang, W; Zhang, Y; Pang, XY	Phosphorus addition decreases plant lignin but increases microbial necromass contribution to soil organic carbon in a subalpine forest	GLOBAL CHANGE BIOLOGY	Article	Chinese Academy of Sciences; Chengdu Institute of Biology, CAS; Chinese Academy of Sciences; Chengdu Institute of Biology, CAS; University of Gottingen; Peoples Friendship University of Russia; Kazan Federal University; Peking University; Peking University; Chinese Academy of Sciences; University of Chinese Academy of Sciences, CAS	1354-1013	2022	10.1111/gcb.16205
Chen, XF; Wang, JC; Hayat, K; Zhang, D; Zhou, P	Small structures with big impact: Multi-walled carbon nanotubes enhanced remediation efficiency in hyperaccumulator Solanum nigrum L. under cadmium and arsenic stress	CHEMOSPHERE	Article	Shanghai Jiao Tong University; Shanghai Jiao Tong University	0045-6535	2021	10.1016/j.chemosphere.2021.130130
Hou, XR; Wu, SH; Chen, DX; Cheng, M; Yu, XL; Yan, DH; Dang, YX; Peng, MX	Can urban public services and ecosystem services achieve positive synergies?	ECOLOGICAL INDICATORS	Article	Zhejiang University of Finance & Economics; Zhejiang University of Finance & Economics; Zhejiang University of Finance & Economics	1470-160X	2021	10.1016/j.ecolind.2021.107433
Kumar, A; Singh, E; Singh, L; Kumar, S; Kumar, R	Carbon material as a sustainable alternative towards boosting properties of urban soil and foster plant growth	SCIENCE OF THE TOTAL ENVIRONMENT	Article	Council of Scientific & Industrial Research (CSIR) - India; CSIR - National Environmental Engineering Research Institute (NEERI)	0048-9697	2021	10.1016/j.scitotenv.2020.141659
Ma, SH; Chen, GP; Du, EZ; Tian, D; Xing, AJ; Shen, HH; Ji, CJ; Zheng, CY; Zhu, JX; Zhu, JL; Huang, HY; He, HB; Zhu, B; Fang, JY	Effects of nitrogen addition on microbial residues and their contribution to soil organic carbon in China's forests from tropical to boreal zone	ENVIRONMENTAL POLLUTION	Article	Peking University; Beijing Normal University; Capital Normal University; Chinese Academy of Sciences; Institute of Botany, CAS; Lanzhou University; Chinese Academy of Sciences; Shenyang Institute of Applied Ecology, CAS	0269-7491	2021	10.1016/j.envpol.2020.115941
Tian, P; Li, JL; Cao, LD; Pu, RL; Gong, HB; Liu, YC; Zhang, HT; Chen, HL	Impacts of reclamation derived land use changes on ecosystem services in a typical gulf of eastern China: A case study of Hangzhou bay	ECOLOGICAL INDICATORS	Article	Ningbo University; Ningbo University; State University System of Florida; University of South Florida; Ningbo University	1470-160X	2021	10.1016/j.ecolind.2021.108259
Wang, H; Zhang, CY; Zhang, XL; Wang, SJ; Xia, ZX; Zeng, GF; Ding, J; Ren, NQ	Construction of Fe3O4@β-CD/g-C3N4 nanocomposite catalyst for degradation of PCBs in wastewater through photodegradation and heterogeneous Fenton oxidation	CHEMICAL ENGINEERING JOURNAL	Article	Harbin Institute of Technology; Harbin Institute of Technology	1385-8947	2022	10.1016/j.cej.2021.132445
Tian, QX; Jiang, Y; Tang, YA; Wu, Y; Tang, ZY; Liu, F	Soil pH and Organic Carbon Properties Drive Soil Bacterial Communities in Surface and Deep Layers Along an Elevational Gradient	FRONTIERS IN MICROBIOLOGY	Article	Chinese Academy of Sciences; Wuhan Botanical Garden, CAS; Chinese Academy of Sciences; Chinese Academy of Sciences; University of Chinese Academy of Sciences, CAS; Peking University		2021	10.3389/fmicb.2021.646124
Ayala-Pérez, MP; Armstrong-Altrin, JS; Machain-Castillo, ML	Heavy metal contamination and provenance of sediments recovered at the Grijalva River delta, southern Gulf of Mexico	JOURNAL OF EARTH SYSTEM SCIENCE	Article	Universidad Nacional Autonoma de Mexico; Universidad Nacional Autonoma de Mexico	2347-4327	2021	10.1007/s12040-021-01570-w
Sun, XD; Ye, YQ; Ma, QX; Guan, QW; Jones, DL	Variation in enzyme activities involved in carbon and nitrogen cycling in rhizosphere and bulk soil after organic mulching	RHIZOSPHERE	Article	Nanjing Forestry University; Bangor University		2021	10.1016/j.rhisph.2021.100376
Zinger, Y; Prodanovic, V; Zhang, KF; Fletcher, TD; Deletic, A	The effect of intermittent drying and wetting stormwater cycles on the nutrient removal performances of two vegetated biofiltration designs	CHEMOSPHERE	Article	University of New South Wales Sydney; University of Melbourne	0045-6535	2021	10.1016/j.chemosphere.2020.129294
Li, J; Pan, LJ; Yu, GW; Li, CX; Xie, SY; Wang, Y	Synthesis of an easily recyclable and safe adsorbent from sludge pyrochar for ciprofloxacin adsorption	ENVIRONMENTAL RESEARCH	Article	Chinese Academy of Sciences; Institute of Urban Environment, CAS; National University of Singapore; Technical University of Denmark	0013-9351	2021	10.1016/j.envres.2020.110258
Zhang, ZQ; Peng, WX; Duan, CJ; Zhu, XZ; Wu, H; Zhang, XC; Fang, LC	Microplastics pollution from different plastic mulching years accentuate soil microbial nutrient limitations	GONDWANA RESEARCH	Article	Northwest A&F University - China; Northwest A&F University - China; Chinese Academy of Sciences; Institute of Soil & Water Conservation (ISWC), CAS; Ministry of Water Resources; Central China Normal University	1342-937X	2022	10.1016/j.gr.2021.07.028
Nicolini, G; Antoniella, G; Carotenuto, F; Christen, A; Ciais, P; Feigenwinter, C; Gioli, B; Stagakis, S; Velasco, E; Vogt, R; Ward, HC; Barlow, J; Chrysoulakis, N; Duce, P; Graus, M; Helfter, C; Heusinkveld, B; Järvi, L; Karl, T; Marras, S; Masson, V; Matthews, B; Meier, F; Nemitz, E; Sabbatini, S; Scherer, D; Schume, H; Sirca, C; Steeneveld, GJ; Vagnoli, C; Wang, YL; Zaldei, A; Zheng, B; Papale…	Direct observations of CO2 emission reductions due to COVID-19 lockdown across European urban districts	SCIENCE OF THE TOTAL ENVIRONMENT	Article	Centro Euro-Mediterraneo sui Cambiamenti Climatici (CMCC); Tuscia University; Consiglio Nazionale delle Ricerche (CNR); University of Freiburg; UDICE-French Research Universities; Universite Paris Saclay; CEA; Centre National de la Recherche Scientifique (CNRS); University of Basel; University of Innsbruck; University of Reading; UK Centre for Ecology & Hydrology (UKCEH); Wageningen University & …	0048-9697	2022	10.1016/j.scitotenv.2022.154662
Shen, CC; Wang, J; Jing, ZW; Qiao, NH; Xiong, C; Ge, Y	Plant diversity enhances soil fungal network stability indirectly through the increase of soil carbon and fungal keystone taxa richness	SCIENCE OF THE TOTAL ENVIRONMENT	Article	Chinese Academy of Sciences; Research Center for Eco-Environmental Sciences (RCEES); Chinese Academy of Sciences; University of Chinese Academy of Sciences, CAS; Taizhou University; Peking University	0048-9697	2022	10.1016/j.scitotenv.2021.151737
Li, S; Rossel, RAV; Webster, R	The cost-effectiveness of reflectance spectroscopy for estimating soil organic carbon	EUROPEAN JOURNAL OF SOIL SCIENCE	Article	Central China Normal University; Commonwealth Scientific & Industrial Research Organisation (CSIRO); Curtin University; UK Research & Innovation (UKRI); Biotechnology and Biological Sciences Research Council (BBSRC); Rothamsted Research	1351-0754	2022	10.1111/ejss.13202
Adelisardou, F; Zhao, W; Chow, R; Mederly, P; Minkina, T; Schou, JS	Spatiotemporal change detection of carbon storage and sequestration in an arid ecosystem by integrating Google Earth Engine and InVEST (the Jiroft plain, Iran)	INTERNATIONAL JOURNAL OF ENVIRONMENTAL SCIENCE AND TECHNOLOGY	Article	Swiss Federal Institutes of Technology Domain; Swiss Federal Institute of Aquatic Science & Technology (EAWAG); University of Tehran; Beijing Normal University; Stellenbosch University; Constantine the Philosopher University in Nitra; Southern Federal University; University of Copenhagen	1735-1472	2022	10.1007/s13762-021-03676-6
Cao, BW; Yu, L; Naipal, V; Ciais, P; Li, W; Zhao, YY; Wei, W; Chen, D; Liu, Z; Gong, P	A 30 m terrace mapping in China using Landsat 8 imagery and digital elevation model based on the Google Earth Engine	EARTH SYSTEM SCIENCE DATA	Article	Tsinghua University; University of Munich; Centre National de la Recherche Scientifique (CNRS); CNRS - National Institute for Earth Sciences & Astronomy (INSU); UDICE-French Research Universities; Universite Paris Saclay; CEA; China Agricultural University; Ministry of Agriculture & Rural Affairs; Chinese Academy of Sciences; Research Center for Eco-Environmental Sciences (RCEES)	1866-3508	2021	10.5194/essd-13-2437-2021
Niu, B; Zhang, XZ; Piao, SL; Janssens, IA; Fu, G; He, YT; Zhang, YJ; Shi, PL; Dai, EF; Yu, CQ; Zhang, J; Yu, GR; Xu, M; Wu, JS; Zhu, LP; Desai, AR; Chen, JQ; Bohrer, G; Gough, CM; Mammarella, I; Varlagin, A; Fares, S; Zhao, XQ; Li, YN; Wang, HM; Ouyang, Z	Warming homogenizes apparent temperature sensitivity of ecosystem respiration	SCIENCE ADVANCES	Article	Chinese Academy of Sciences; Institute of Geographic Sciences & Natural Resources Research, CAS; Chinese Academy of Sciences; University of Chinese Academy of Sciences, CAS; Chinese Academy of Sciences; University of Chinese Academy of Sciences, CAS; Peking University; Chinese Academy of Sciences; Institute of Tibetan Plateau Research, CAS; University of Antwerp; Beijing Normal University; Chines…	2375-2548	2021	10.1126/sciadv.abc7358
Rahman, MS; Bhuiyan, SS; Ahmed, Z; Saha, N; Begum, BA	Characterization and source apportionment of elemental species in PM2.5 with especial emphasis on seasonal variation in the capital city Dhaka, Bangladesh	URBAN CLIMATE	Article	Shahjalal University of Science & Technology (SUST); University of Queensland	2212-0955	2021	10.1016/j.uclim.2021.100804
Ren, WX; Wu, XD; Ge, XG; Lin, GY; Zhou, MD; Long, ZJ; Yu, XH; Tian, W	Characteristics of dissolved organic matter in lakes with different eutrophic levels in southeastern Hubei Province, China	JOURNAL OF OCEANOLOGY AND LIMNOLOGY	Article	Hubei Normal University	2096-5508	2021	10.1007/s00343-020-0102-x
Saraga, D; Maggos, T; Degrendele, C; Klánová, J; Horvat, M; Kocman, D; Kanduc, T; Dos Santos, SG; Franco, R; Gómez, PM; Manousakas, M; Bairachtari, K; Eleftheriadis, K; Kermenidou, M; Karakitsios, S; Gotti, A; Sarigiannis, D	Multi-city comparative PM2.5 source apportionment for fifteen sites in Europe: The ICARUS project	SCIENCE OF THE TOTAL ENVIRONMENT	Article	National Centre of Scientific Research Demokritos; Masaryk University Brno; Slovenian Academy of Sciences & Arts (SASA); Jozef Stefan Institute; Instituto de Salud Carlos III; Centro Nacional de Sanidad Ambiental (CNSA); National Centre of Scientific Research Demokritos; Aristotle University of Thessaloniki; Swiss Federal Institutes of Technology Domain; Paul Scherrer Institute	0048-9697	2021	10.1016/j.scitotenv.2020.141855
Zhao, JX; Tian, LH; Wei, HX; Zhang, T; Bai, YF; Li, RC; Tang, YH	Impact of plateau pika (Ochotona curzoniae) burrowing-induced microtopography on ecosystem respiration of the alpine meadow and steppe on the Tibetan plateau	PLANT AND SOIL	Article	Peking University; Peking University; Southwest Minzu University; Chinese Academy of Sciences; Institute of Tibetan Plateau Research, CAS; Lanzhou University	0032-079X	2021	10.1007/s11104-019-04122-w
Cui, YX; Bing, HJ; Moorhead, DL; Delgado-Baquerizo, M; Ye, LP; Yu, JL; Zhang, SP; Wang, X; Peng, SS; Guo, X; Zhu, BA; Chen, J; Tan, WF; Wang, YQ; Zhang, XC; Fang, LCA	Ecoenzymatic stoichiometry reveals widespread soil phosphorus limitation to microbial metabolism across Chinese forests	COMMUNICATIONS EARTH & ENVIRONMENT	Article	Chinese Academy of Sciences; Institute of Soil & Water Conservation (ISWC), CAS; Chinese Academy of Sciences; University of Chinese Academy of Sciences, CAS; Peking University; Chinese Academy of Sciences; Institute of Mountain Hazards & Environment, CAS; University System of Ohio; University of Toledo; Consejo Superior de Investigaciones Cientificas (CSIC); CSIC - Instituto de Recursos Naturales…		2022	10.1038/s43247-022-00523-5
Zhou, YQ; Zhou, L; Zhang, YL; Zhu, GW; Qin, BQ; Jang, KS; Spencer, RGM; Kothawala, DN; Jeppesen, E; Brookes, JD; Wu, FC	Unraveling the Role of Anthropogenic and Natural Drivers in Shaping the Molecular Composition and Biolability of Dissolved Organic Matter in Non-pristine Lakes	ENVIRONMENTAL SCIENCE & TECHNOLOGY	Article	Chinese Academy of Sciences; Institute of Soil Science, CAS; Chinese Academy of Sciences; Nanjing Institute of Geography & Limnology, CAS; Chinese Academy of Sciences; University of Chinese Academy of Sciences, CAS; Korea Basic Science Institute (KBSI); State University System of Florida; Florida State University; Uppsala University; Aarhus University; Aarhus University; Middle East Technical Uni…	0013-936X	2022	10.1021/acs.est.1c08003
Chen, X; Feng, JG; Ding, ZJ; Tang, M; Zhu, B	Changes in soil total, microbial and enzymatic C-N-P contents and stoichiometry with depth and latitude in forest ecosystems	SCIENCE OF THE TOTAL ENVIRONMENT	Article	Peking University; Peking University; Chinese Academy of Sciences; Institute of Atmospheric Physics, CAS	0048-9697	2022	10.1016/j.scitotenv.2021.151583
Delgado-Artés, R; Garófano-Gómez, V; Oliver-Villanueva, JV; Rojas-Briales, E	Land use/cover change analysis in the Mediterranean region: a regional case study of forest evolution in Castello (Spain) over 50 years	LAND USE POLICY	Article	Universitat Politecnica de Valencia; Centre National de la Recherche Scientifique (CNRS); Universite Clermont Auvergne (UCA); Universite de Limoges; Universitat Politecnica de Valencia	0264-8377	2022	10.1016/j.landusepol.2021.105967
Zhang, YW; Guo, YP; Tang, ZY; Feng, YH; Zhu, XR; Xu, WT; Bai, YF; Zhou, GY; Xie, ZQ; Fang, JY	Patterns of nitrogen and phosphorus pools in terrestrial ecosystems in China	EARTH SYSTEM SCIENCE DATA	Article	Peking University; Peking University; Chinese Academy of Sciences; Institute of Botany, CAS; Nanjing University of Information Science & Technology	1866-3508	2021	10.5194/essd-13-5337-2021
Li, HQ; Zhu, HS; Liang, CL; Wei, XR; Yao, YF	Soil erosion significantly decreases aggregate-associated OC and N in agricultural soils of Northeast China	AGRICULTURE ECOSYSTEMS & ENVIRONMENT	Article	Chinese Academy of Sciences; Northwest A&F University - China; Northwest A&F University - China; Shihezi University; Northwest University Xi'an; Chinese Academy of Sciences; University of Chinese Academy of Sciences, CAS	0167-8809	2022	10.1016/j.agee.2021.107677
Zhang, RY; Tian, DS; Chen, HYH; Seabloom, EW; Han, GD; Wang, SP; Yu, GR; Li, ZL; Niu, SL	Biodiversity alleviates the decrease of grassland multifunctionality under grazing disturbance: A global meta-analysis	GLOBAL ECOLOGY AND BIOGEOGRAPHY	Article	Chinese Academy of Sciences; Institute of Geographic Sciences & Natural Resources Research, CAS; Lakehead University; Fujian Normal University; University of Minnesota System; University of Minnesota Twin Cities; Inner Mongolia Agricultural University; Ministry of Agriculture & Rural Affairs; Peking University; Shandong Agricultural University; Chinese Academy of Sciences; University of Chinese A…	1466-822X	2022	10.1111/geb.13408
Fu, W; Chen, BD; Rillig, MC; Jansa, J; Ma, W; Xu, C; Luo, WT; Wu, HH; Hao, ZP; Wu, H; Zhao, AH; Yu, Q; Han, XG	Community response of arbuscular mycorrhizal fungi to extreme drought in a cold-temperate grassland	NEW PHYTOLOGIST	Article	Chinese Academy of Sciences; Research Center for Eco-Environmental Sciences (RCEES); Chinese Academy of Sciences; University of Chinese Academy of Sciences, CAS; Free University of Berlin; Czech Academy of Sciences; Institute of Microbiology of the Czech Academy of Sciences; Chinese Academy of Sciences; Shenyang Institute of Applied Ecology, CAS; Chinese Academy of Agricultural Sciences; Institut…	0028-646X	2022	10.1111/nph.17692
Hong, YS; Chen, YY; Shen, RL; Chen, SC; Xu, G; Cheng, H; Guo, L; Wei, ZS; Yang, J; Liu, YL; Shi, Z; Mouazen, AM	Diagnosis of cadmium contamination in urban and suburban soils using visible-to-near-infrared spectroscopy	ENVIRONMENTAL POLLUTION	Article	Wuhan University; Ghent University; Zhejiang University; Wuhan University; Huazhong Agricultural University	0269-7491	2021	10.1016/j.envpol.2021.118128
Wei, W; Zhang, J; Zhou, JJ; Zhou, L; Xie, BB; Li, CH	Monitoring drought dynamics in China using Optimized Meteorological Drought Index (OMDI) based on remote sensing data sets	JOURNAL OF ENVIRONMENTAL MANAGEMENT	Article	Northwest Normal University - China; Lanzhou Jiaotong University; Chinese Academy of Sciences; Institute of Geographic Sciences & Natural Resources Research, CAS; Lanzhou City University	0301-4797	2021	10.1016/j.jenvman.2021.112733
Zhai, KJ; Fang, HY; Guo, CC; Fu, B; Ni, PP; Ma, HH; He, H; Wang, FM	Mechanical properties of CFRP-strengthened prestressed concrete cylinder pipe based on multi-field coupling	THIN-WALLED STRUCTURES	Article	Sun Yat Sen University; Zhengzhou University; Jinan University; Southern Marine Science & Engineering Guangdong Laboratory; Southern Marine Science & Engineering Guangdong Laboratory (Zhuhai)	0263-8231	2021	10.1016/j.tws.2021.107629
Nguyen, THA; Oh, SY	Anode carbonaceous material recovered from spent lithium-ion batteries in electric vehicles for environmental application	WASTE MANAGEMENT	Article	University of Ulsan	0956-053X	2021	10.1016/j.wasman.2020.10.044
Gupta, V; Siddique, S; Chaudhary, S	Optimum mixing sequence and moisture content for hydrated lime fly ash bricks	JOURNAL OF CLEANER PRODUCTION	Article	Indian Institute of Technology System (IIT System); Indian Institute of Technology (IIT) - Indore; Incheon National University; Indian Institute of Technology System (IIT System); Indian Institute of Technology (IIT) - Indore	0959-6526	2021	10.1016/j.jclepro.2020.124859
Li, YY; Zhang, Y; Chapman, SJ; Yao, HY	Biological nitrification inhibition by sorghum root exudates impacts ammonia-oxidizing bacteria but not ammonia-oxidizing archaea	BIOLOGY AND FERTILITY OF SOILS	Article	Chinese Academy of Sciences; Institute of Urban Environment, CAS; Chinese Academy of Sciences; James Hutton Institute; Wuhan Institute of Technology	0178-2762	2021	10.1007/s00374-020-01538-w
Hong, JT; Lu, XY; Ma, XX; Wang, XD	Five-year study on the effects of warming and plant litter quality on litter decomposition rate in a Tibetan alpine grassland	SCIENCE OF THE TOTAL ENVIRONMENT	Article	Chinese Academy of Sciences; Institute of Mountain Hazards & Environment, CAS; Shanxi Normal University	0048-9697	2021	10.1016/j.scitotenv.2020.142306
Pi, KF; Bieroza, M; Brouchkov, A; Chen, WT; Dufour, LJP; Gongalsky, KB; Herrmann, AM; Krab, EJ; Landesman, C; Laverman, AM; Mazei, N; Mazei, Y; Öquist, MG; Peichl, M; Pozdniakov, S; Rezanezhad, F; Roose-Amsaleg, C; Shatilovich, A; Shi, A; Smeaton, CM; Tong, L; Tsyganov, AN; Van Cappellen, P	The Cold Region Critical Zone in Transition: Responses to Climate Warming and Land Use Change	ANNUAL REVIEW OF ENVIRONMENT AND RESOURCES, VOL 46, 2021	Review; Book Chapter	China University of Geosciences; University of Waterloo; University of Waterloo; Swedish University of Agricultural Sciences; Lomonosov Moscow State University; China University of Geosciences; Russian Academy of Sciences; Saratov Scientific Center of the Russian Academy of Sciences; Severtsov Institute of Ecology & Evolution; Centre National de la Recherche Scientifique (CNRS); CNRS - National I…	1543-5938	2021	10.1146/annurev-environ-012220-125703
Mickan, BS; Ren, AT; Buhlmann, CH; Ghadouani, A; Solaiman, ZM; Jenkins, S; Pang, JY; Ryan, MH	Closing the circle for urban food waste anaerobic digestion: The use of digestate and biochar on plant growth in potting soil	JOURNAL OF CLEANER PRODUCTION	Article	University of Western Australia; University of Western Australia; Yangtze University; Murdoch University; University of Western Australia; University of Western Australia	0959-6526	2022	10.1016/j.jclepro.2022.131071
Song, ZL; Wu, YT; Yang, YH; Zhang, XD; Van Zwieten, L; Bolan, N; Li, ZM; Liu, HY; Hao, Q; Yu, CX; Sun, XL; Song, AL; Wang, WY; Liu, CQ; Wang, HL	High potential of stable carbon sequestration in phytoliths of China's grasslands	GLOBAL CHANGE BIOLOGY	Article	Tianjin University; Chinese Academy of Sciences; Institute of Botany, CAS; NSW Department of Primary Industries; University of Western Australia; Peking University; Linnaeus University; Stockholm University; Chinese Academy of Agricultural Sciences; Institute of Agricultural Resources & Regional Planning, CAAS; Beijing Normal University; Foshan University; Zhejiang A&F University	1354-1013	2022	10.1111/gcb.16092
Silva, LFO; Schneider, IL; Artaxo, P; Núñez-Blanco, Y; Pinto, D; Flores, ÉMM; Gómez-Plata, L; Ramírez, O; Dotto, GL	Particulate matter geochemistry of a highly industrialized region in the Caribbean: Basis for future toxicological studies	GEOSCIENCE FRONTIERS	Article	Universidad de la Costa; Universidade de Sao Paulo; Universidade Federal de Santa Maria (UFSM); Universidade Federal de Santa Maria (UFSM)	1674-9871	2022	10.1016/j.gsf.2020.11.012
Wang, C; Tang, CJ; Fu, BJ; Lu, YH; Xiao, SS; Zhang, J	Determining critical thresholds of ecological restoration based on ecosystem service index: A case study in the Pingjiang catchment in southern China	JOURNAL OF ENVIRONMENTAL MANAGEMENT	Article	Chinese Academy of Sciences; Research Center for Eco-Environmental Sciences (RCEES)	0301-4797	2022	10.1016/j.jenvman.2021.114220
Li, JJ; Li, LJ; Arif, M; Ding, DD; Hu, X; Zheng, J; Yuan, ZX; Li, CX	Artificial Plantation Responses to Periodic Submergence in Massive Dam and Reservoir Riparian Zones: Changes in Soil Properties and Bacterial Community Characteristics	BIOLOGY-BASEL	Article	Southwest University - China		2021	10.3390/biology10080819
Zhang, ZP; Ding, JL; Zhu, CM; Chen, XY; Wang, JZ; Han, LJ; Ma, X; Xu, D	Bivariate empirical mode decomposition of the spatial variation in the soil organic matter content: A case study from NW China	CATENA	Article	Xinjiang University; Xinjiang University; Lanzhou University; Shenzhen University; Shenzhen University; Shenzhen University; Beijing Normal University; Beijing Normal University	0341-8162	2021	10.1016/j.catena.2021.105572
Boussetta, S; Balsamo, G; Arduini, G; Dutra, E; McNorton, J; Choulga, M; Agustí-Panareda, A; Beljaars, A; Wedi, N; Munoz-Sabater, J; de Rosnay, P; Sandu, I; Hadade, I; Carver, G; Mazzetti, C; Prudhomme, C; Yamazaki, D; Zsoter, E	ECLand: The ECMWF Land Surface Modelling System	ATMOSPHERE	Article	European Centre for Medium-Range Weather Forecasts (ECMWF); Instituto Portugues do Mar e da Atmosfera; Universidade de Lisboa; University of Tokyo		2021	10.3390/atmos12060723
Qiu, CJ; Ciais, P; Zhu, D; Guenet, B; Peng, SS; Petrescu, AMR; Lauerwald, R; Makowski, D; Gallego-Sala, AV; Charman, DJ; Brewer, SC	Large historical carbon emissions from cultivated northern peatlands	SCIENCE ADVANCES	Article	UDICE-French Research Universities; Universite Paris Saclay; CEA; Centre National de la Recherche Scientifique (CNRS); CNRS - National Institute for Earth Sciences & Astronomy (INSU); INRAE; AgroParisTech; UDICE-French Research Universities; Universite Paris Saclay; Autonomous University of Barcelona; UDICE-French Research Universities; Universite PSL; Ecole Normale Superieure (ENS); Centre Natio…	2375-2548	2021	10.1126/sciadv.abf1332
Rodríguez-Espinosa, T; Navarro-Pedreño, J; Gomez-Lucas, I; Jordán-Vidal, MM; Bech-Borras, J; Zorpas, AA	Urban areas, human health and technosols for the green deal	ENVIRONMENTAL GEOCHEMISTRY AND HEALTH	Article	Universidad Miguel Hernandez de Elche; University of Barcelona; Open University of Cyprus	0269-4042	2021	10.1007/s10653-021-00953-8
Palmero-Iniesta, M; Pino, J; Pesquer, L; Espelta, JM	Recent forest area increase in Europe: expanding and regenerating forests differ in their regional patterns, drivers and productivity trends	EUROPEAN JOURNAL OF FOREST RESEARCH	Article	Centro de Investigacion Ecologica y Aplicaciones Forestales (CREAF-CERCA); Autonomous University of Barcelona	1612-4669	2021	10.1007/s10342-021-01366-z
Shi, P; Li, ZB; Li, P; Zhang, Y; Li, BB	Trade-offs Among Ecosystem Services After Vegetation Restoration in China's Loess Plateau	NATURAL RESOURCES RESEARCH	Article	Xi'an University of Technology; Xi'an University of Technology; Northwest University Xi'an	1520-7439	2021	10.1007/s11053-021-09841-5
Jiao, PP; Li, ZW; Yang, L; He, JJ; Chang, XF; Xiao, HB; Nie, XD; Tong, D	Bacteria are more sensitive than fungi to moisture in eroded soil by natural grass vegetation restoration on the Loess Plateau	SCIENCE OF THE TOTAL ENVIRONMENT	Article	Chinese Academy of Sciences; Institute of Soil & Water Conservation (ISWC), CAS; Chinese Academy of Sciences; University of Chinese Academy of Sciences, CAS; Chinese Academy of Sciences; Institute of Soil Science, CAS; Hunan Normal University; Hunan University; Capital Normal University; Huazhong Agricultural University	0048-9697	2021	10.1016/j.scitotenv.2020.143899
Wang, Z; Saadé, NK; Ariya, PA	Advances in Ultra-Trace Analytical Capability for Micro/Nanoplastics and Water-Soluble Polymers in the Environment: Fresh Falling Urban Snow	ENVIRONMENTAL POLLUTION	Article	McGill University; McGill University	0269-7491	2021	10.1016/j.envpol.2021.116698
Li, S; Hu, MJ; Shi, JL; Tian, XH; Wu, JC	Integrated wheat-maize straw and tillage management strategies influence economic profit and carbon footprint in the Guanzhong Plain of China	SCIENCE OF THE TOTAL ENVIRONMENT	Article	Hebei University; Northwest A&F University - China; Henan University; China Agricultural University; Lulea University of Technology	0048-9697	2021	10.1016/j.scitotenv.2021.145347
Li, YX; Liu, ZS; Li, SJ; Li, X	Multi-Scenario Simulation Analysis of Land Use and Carbon Storage Changes in Changchun City Based on FLUS and InVEST Model	LAND	Article	Jilin University		2022	10.3390/land11050647
Seiler, C; Melton, JR; Arora, VK; Sitch, S; Friedlingstein, P; Anthoni, P; Goll, D; Jain, AK; Joetzjer, E; Lienert, S; Lombardozzi, D; Luyssaert, S; Nabel, JEMS; Tian, HQ; Vuichard, N; Walker, AP; Yuan, WP; Zaehle, S	Are Terrestrial Biosphere Models Fit for Simulating the Global Land Carbon Sink?	JOURNAL OF ADVANCES IN MODELING EARTH SYSTEMS	Article	Environment & Climate Change Canada; Environment & Climate Change Canada; Canadian Centre for Climate Modelling & Analysis (CCCma); University of Exeter; University of Exeter; Helmholtz Association; Karlsruhe Institute of Technology; UDICE-French Research Universities; Universite Paris Cite; Universite Paris Saclay; CEA; Centre National de la Recherche Scientifique (CNRS); University of Illinois …		2022	10.1029/2021MS002946
Xia, F; Yang, YX; Zhang, SQ; Yang, YX; Li, DH; Sun, W; Xie, YJ	Influencing factors of the supply-demand relationships of carbon sequestration and grain provision in China: Does land use matter the most?	SCIENCE OF THE TOTAL ENVIRONMENT	Article	Fudan University	0048-9697	2022	10.1016/j.scitotenv.2022.154979
Feng, YZ; Zhang, JW; Berdugo, M; Guirado, E; Guerra, CA; Egidi, E; Wang, JT; Singh, BK; Delgado-Baquerizo, M	Temperature thresholds drive the global distribution of soil fungal decomposers	GLOBAL CHANGE BIOLOGY	Article	Chinese Academy of Sciences; Institute of Soil Science, CAS; Universitat d'Alacant; Consejo Superior de Investigaciones Cientificas (CSIC); CSIC-UPF - Institut de Biologia Evolutiva (IBE); Martin Luther University Halle Wittenberg; Western Sydney University; Western Sydney University; Chinese Academy of Sciences; Research Center for Eco-Environmental Sciences (RCEES); Consejo Superior de Investig…	1354-1013	2022	10.1111/gcb.16096
Zhang, SH; Xiong, KN; Qin, Y; Min, XY; Xiao, J	Evolution and determinants of ecosystem services: insights from South China karst	ECOLOGICAL INDICATORS	Article	Guizhou Normal University	1470-160X	2021	10.1016/j.ecolind.2021.108437
Shen, YS; Lin, YC; Cui, SH; Li, YM; Zhai, XX	Crucial factors of the built environment for mitigating carbon emissions	SCIENCE OF THE TOTAL ENVIRONMENT	Article	Chinese Academy of Sciences; Institute of Urban Environment, CAS; Chinese Academy of Sciences; Institute of Urban Environment, CAS; Chinese Academy of Sciences; University of Chinese Academy of Sciences, CAS; Feng Chia University; Anhui University of Science & Technology; Anhui University of Science & Technology; Anhui University of Science & Technology; Fujian Agriculture & Forestry University	0048-9697	2022	10.1016/j.scitotenv.2021.150864
Zhang, M; Jin, BJ; Bi, QF; Li, KJ; Sun, CL; Lin, XY; Zhu, YG	Variations of earthworm gut bacterial community composition and metabolic functions in coastal upland soil along a 700-year reclamation chronosequence	SCIENCE OF THE TOTAL ENVIRONMENT	Article	Zhejiang University; Chinese Academy of Sciences; Institute of Urban Environment, CAS; Max Planck Society; Chinese Academy of Sciences; Research Center for Eco-Environmental Sciences (RCEES)	0048-9697	2022	10.1016/j.scitotenv.2021.149994
Wang, G; Wang, L; Ma, F	Effects of earthworms and arbuscular mycorrhizal fungi on improvement of fertility and microbial communities of soils heavily polluted by cadmium	CHEMOSPHERE	Article	Harbin Institute of Technology	0045-6535	2022	10.1016/j.chemosphere.2021.131567
Li, ZY; Qiu, XR; Sun, Y; Liu, SN; Hu, HL; Xie, JL; Chen, G; Xiao, YL; Tang, Y; Tu, LH	C:N:P stoichiometry responses to 10 years of nitrogen addition differ across soil components and plant organs in a subtropical Pleioblastus amarus forest	SCIENCE OF THE TOTAL ENVIRONMENT	Article	Sichuan Agricultural University; East China Normal University; Sichuan Agricultural University; Sichuan Agricultural University	0048-9697	2021	10.1016/j.scitotenv.2021.148925
Zhao, Z; Li, W; Ciais, P; Santoro, M; Cartus, O; Peng, SS; Yin, Y; Yue, C; Yang, H; Yu, L; Zhu, L; Wang, JM	Fire enhances forest degradation within forest edge zones in Africa	NATURE GEOSCIENCE	Article	Tsinghua University; UDICE-French Research Universities; Universite Paris Saclay; CEA; Centre National de la Recherche Scientifique (CNRS); GAMMA Remote Sensing AG; Peking University; California Institute of Technology; Northwest A&F University - China	1752-0894	2021	10.1038/s41561-021-00763-8
Yuan, X; Chen, Y; Qin, WK; Xu, TL; Mao, YH; Wang, Q; Chen, KL; Zhu, B	Plant and microbial regulations of soil carbon dynamics under warming in two alpine swamp meadow ecosystems on the Tibetan Plateau	SCIENCE OF THE TOTAL ENVIRONMENT	Article	Peking University; Qinghai Normal University	0048-9697	2021	10.1016/j.scitotenv.2021.148072
Zhao, ZH; Gao, SF; Lu, CY; Li, XY; Li, F; Wang, TY	Effects of different tillage and fertilization management practices on soil organic carbon and aggregates under the rice-wheat rotation system	SOIL & TILLAGE RESEARCH	Article	Henan University of Urban Construction; Henan Agricultural University; Chinese Academy of Sciences; Institute of Soil Science, CAS	0167-1987	2021	10.1016/j.still.2021.105071
Dvornikov, YA; Vasenev, VI; Romzaykina, ON; Grigorieva, VE; Litvinov, YA; Gorbov, SN; Dolgikh, AV; Korneykova, MV; Gosse, DD	Projecting the urbanization effect on soil organic carbon stocks in polar and steppe areas of European Russia by remote sensing	GEODERMA	Article	Peoples Friendship University of Russia; Southern Federal University; Russian Academy of Sciences; Institute of Geography, Russian Academy of Sciences; Russian Academy of Sciences; Kola Science Centre of the Russian Academy of Sciences; Institute of North Industrial Ecology Problems, Kola Science Centre of the Russian Academy of Sciences; Lomonosov Moscow State University	0016-7061	2021	10.1016/j.geoderma.2021.115039
Arora, S; Jung, J; Liu, M; Li, X; Goel, A; Chen, JL; Song, S; Anderson, C; Chen, DX; Leong, K; Lim, SH; Fong, SL; Ghosh, S; Lin, A; Kua, HW; Tan, HTW; Dai, YJ; Wang, CH	Gasification biochar from horticultural waste: An exemplar of the circular economy in Singapore	SCIENCE OF THE TOTAL ENVIRONMENT	Article	National University of Singapore; National University of Singapore; National University of Singapore; National University of Singapore; Shanghai Jiao Tong University; University of New England	0048-9697	2021	10.1016/j.scitotenv.2021.146573
Wang, J; Fu, X; Ghimire, R; Sainju, UM; Jia, Y; Zhao, FZ	Responses of soil bacterial community and enzyme activity to organic matter components under long-term fertilization on the Loess Plateau of China	APPLIED SOIL ECOLOGY	Article	Ministry of Water Resources; Chinese Academy of Sciences; Institute of Soil & Water Conservation (ISWC), CAS; Northwest University Xi'an; Hebei Agricultural University; New Mexico State University; United States Department of Agriculture (USDA); McGill University	0929-1393	2021	10.1016/j.apsoil.2021.103992
Li, YW; Duan, XW; Li, Y; Li, YX; Zhang, LL	Interactive effects of land use and soil erosion on soil organic carbon in the dry-hot valley region of southern China	CATENA	Article	Yunnan University; Yunnan University; Chinese Academy of Sciences; Research Center for Eco-Environmental Sciences (RCEES); Chinese Academy of Sciences; University of Chinese Academy of Sciences, CAS	0341-8162	2021	10.1016/j.catena.2021.105187
Hamelin, L; Moller, HB; Jorgensen, U	Harnessing the full potential of biomethane towards tomorrow's bioeconomy: A national case study coupling sustainable agricultural intensification, emerging biogas technologies and energy system analysis	RENEWABLE & SUSTAINABLE ENERGY REVIEWS	Article	Aarhus University; INRAE; Universite Federale Toulouse Midi-Pyrenees (ComUE); Universite de Toulouse; Institut National des Sciences Appliquees de Toulouse; Universite de Toulouse; Universite Federale Toulouse Midi-Pyrenees (ComUE); Institut National des Sciences Appliquees de Toulouse; Centre National de la Recherche Scientifique (CNRS); CNRS - Institute for Engineering & Systems Sciences (INSIS…	1364-0321	2021	10.1016/j.rser.2020.110506
Liang, C; Peng, B; Wei, GL; Gong, YY; Liu, GQ; Zeng, LX; Liu, LY; Zeng, EY	Organophosphate Diesters in Urban River Sediment from South China: Call for More Research on Their Occurrence and Fate in Field Environment	ACS ES&T WATER	Article	Jinan University; Guangdong Academy of Sciences; Institute of Eco-environmental & Soil Sciences, Guangdong Academy of Sciences; Jinan University		2021	10.1021/acsestwater.0c00217
Yang, SL; Zheng, YF; Mao, YX; Xu, L; Jin, Z; Zhao, M; Kong, HN; Huang, XF; Zheng, XY	Domestic wastewater treatment for single household via novel subsurface wastewater infiltration systems (SWISs) with NiiMi process: Performance and microbial community	JOURNAL OF CLEANER PRODUCTION	Article	Wenzhou University	0959-6526	2021	10.1016/j.jclepro.2020.123434
Tong, H; Zheng, CJ; Li, B; Swanner, ED; Liu, CS; Chen, MJ; Xia, YF; Liu, YH; Ning, ZP; Li, FB; Feng, XB	Microaerophilic Oxidation of Fe(II) Coupled with Simultaneous Carbon Fixation and As(III) Oxidation and Sequestration in Karstic Paddy Soil	ENVIRONMENTAL SCIENCE & TECHNOLOGY	Article	Guangdong Academy of Sciences; Institute of Eco-environmental & Soil Sciences, Guangdong Academy of Sciences; Chinese Academy of Sciences; Guiyang Institute of Geochemistry, CAS; Iowa State University; Tsinghua University	0013-936X	2021	10.1021/acs.est.0c05791
Yang, S; Wu, H; Wang, ZR; Semenov, MV; Ye, J; Yin, LM; Wang, XG; Kravchenko, I; Semenov, V; Kuzyakov, Y; Jiang, Y; Li, H	Linkages between the temperature sensitivity of soil respiration and microbial life strategy are dependent on sampling season	SOIL BIOLOGY & BIOCHEMISTRY	Article	Chinese Academy of Sciences; Shenyang Institute of Applied Ecology, CAS; Guangdong Academy of Sciences; Russian Academy of Sciences; Dokuchaev Soil Science Institute; Russian Academy of Sciences; Research Center of Biotechnology RAS; Russian Academy of Sciences; Pushchino Scientific Center for Biological Research (PSCBI) of the Russian Academy of Sciences; Institute of Physicohemical & Biological…	0038-0717	2022	10.1016/j.soilbio.2022.108758
Ma, XY; Wang, TX; Shi, Z; Chiariello, NR; Docherty, K; Field, CB; Gutknecht, J; Gao, Q; Gu, YF; Guo, X; Hungate, BA; Lei, JS; Niboyet, A; Le Roux, X; Yuan, MT; Yuan, T; Zhou, JZ; Yang, YF	Long-term nitrogen deposition enhances microbial capacities in soil carbon stabilization but reduces network complexity	MICROBIOME	Article	Tsinghua University; University of Oklahoma System; University of Oklahoma - Norman; University of Oklahoma System; University of Oklahoma - Norman; Carnegie Institution for Science; Western Michigan University; Helmholtz Association; Helmholtz Center for Environmental Research (UFZ); University of Minnesota System; University of Minnesota Twin Cities; Sichuan Agricultural University; Northern Ar…	2049-2618	2022	10.1186/s40168-022-01309-9
Yang, J; Zhou, MR; Yu, KF; Gin, KYH; Hassan, M; He, YL	Heavy metals in a typical city-river-reservoir system of East China: Multi-phase distribution, microbial response and ecological risk	JOURNAL OF ENVIRONMENTAL SCIENCES	Article	Shanghai Jiao Tong University; National University of Singapore; Shanghai Jiao Tong University; National University of Singapore; South Ural State University	1001-0742	2022	10.1016/j.jes.2021.05.014
Dong, YH; Peng, FL; Qiao, YK; Zhang, JB; Wu, XL	Measuring the monetary value of environmental externalities derived from urban underground facilities: Towards a better understanding of sustainable underground spaces	ENERGY AND BUILDINGS	Article	Tongji University; Tongji University; Qingdao University of Technology	0378-7788	2021	10.1016/j.enbuild.2021.111313
Bachwenkizi, J; Liu, C; Meng, X; Zhang, LN; Wang, WD; van Donkelaar, A; Martin, RV; Hammer, MS; Chen, RJ; Kan, HD	Fine particulate matter constituents and infant mortality in Africa: A multicountry study	ENVIRONMENT INTERNATIONAL	Article	Fudan University; Fudan University; Fudan University; Dalhousie University; Washington University (WUSTL)	0160-4120	2021	10.1016/j.envint.2021.106739
Wang, JF; Bao, HY; Pan, GD; Zhang, H; Li, J; Li, J; Cai, J; Wu, FY	Combined application of rhamnolipid and agricultural wastes enhances PAHs degradation via increasing their bioavailability and changing microbial community in contaminated soil	JOURNAL OF ENVIRONMENTAL MANAGEMENT	Article	Northwest A&F University - China; Ministry of Agriculture & Rural Affairs; Harbin Institute of Technology	0301-4797	2021	10.1016/j.jenvman.2021.112998
Moinard, V; Levavasseur, F; Houot, S	Current and potential recycling of exogenous organic matter as fertilizers and amendments in a French peri-urban territory	RESOURCES CONSERVATION AND RECYCLING	Article	AgroParisTech; UDICE-French Research Universities; Universite Paris Saclay; INRAE	0921-3449	2021	10.1016/j.resconrec.2021.105523
Lin, ZY; Xiao, Y; Ou-Yang, ZY	Assessment of ecological importance of the Qinghai-Tibet Plateau based on ecosystem service flows	JOURNAL OF MOUNTAIN SCIENCE	Article	Chinese Academy of Sciences; Research Center for Eco-Environmental Sciences (RCEES); Chinese Academy of Sciences; University of Chinese Academy of Sciences, CAS	1672-6316	2021	10.1007/s11629-020-6448-x
Guan, CY; Yu, CP	Evaluation of plant microbial fuel cells for urban green roofs in a subtropical metropolis	SCIENCE OF THE TOTAL ENVIRONMENT	Article	National Taiwan University; National Ilan University; National Taiwan University	0048-9697	2021	10.1016/j.scitotenv.2020.142786
Abbas, S; Nichol, JE; Zhang, JL; Fischer, GA; Wong, MS; Irteza, SM	Spatial and environmental constraints on natural forest regeneration in the degraded landscape of Hong Kong	SCIENCE OF THE TOTAL ENVIRONMENT	Article	Hong Kong Polytechnic University; University of Sussex; Hong Kong Polytechnic University	0048-9697	2021	10.1016/j.scitotenv.2020.141760
Song, CR; Yang, J; Wu, F; Xiao, XM; Cecilia, JX; Li, XM	Response characteristics and influencing factors of carbon emissions and land surface temperature in Guangdong Province, China	URBAN CLIMATE	Article	Liaoning Normal University; Northeastern University - China; Northeastern University - China; Chinese Academy of Sciences; Institute of Geographic Sciences & Natural Resources Research, CAS; University of Oklahoma System; University of Oklahoma - Norman; Curtin University	2212-0955	2022	10.1016/j.uclim.2022.101330
Wang, H; Yan, SJ; Ciais, P; Wigneron, JP; Liu, LB; Li, Y; Fu, Z; Ma, HL; Liang, Z; Wei, FL; Wang, YY; Li, SC	Exploring complex water stress-gross primary production relationships: Impact of climatic drivers, main effects, and interactive effects	GLOBAL CHANGE BIOLOGY	Article	Peking University; UDICE-French Research Universities; Universite Paris Saclay; CEA; Centre National de la Recherche Scientifique (CNRS); Universite Paris Cite; INRAE; Chinese Academy of Sciences; Swiss Federal Institutes of Technology Domain; ETH Zurich; Beijing Normal University; Beijing Normal University; Wuhan University	1354-1013	2022	10.1111/gcb.16201
Chen, WX; Meng, H; Song, HQ; Zheng, H	Progress in Dust Modelling, Global Dust Budgets, and Soil Organic Carbon Dynamics	LAND	Article	Henan University; Chinese Academy of Sciences; Nanjing Institute of Geography & Limnology, CAS; Chinese Academy of Sciences; University of Chinese Academy of Sciences, CAS; Henan University		2022	10.3390/land11020176
Paula, AJ; Ferreira, OP; Souza, AG; Nepomuceno, F; Andrade, CE; Faria, AF	Machine Learning and Natural Language Processing Enable a Data-Oriented Experimental Design Approach for Producing Biochar and Hydrochar from Biomass	CHEMISTRY OF MATERIALS	Article	Universidade Federal do Ceara; Universidade Federal do Ceara; Universidade Federal do Ceara; AT&T; State University System of Florida; University of Florida	0897-4756	2022	10.1021/acs.chemmater.1c02961
Chen, TT; Peng, L; Wang, Q	Response and multiscenario simulation of trade-offs/synergies among ecosystem services to the Grain to Green Program: a case study of the Chengdu-Chongqing urban agglomeration, China	ENVIRONMENTAL SCIENCE AND POLLUTION RESEARCH	Article	Chongqing Normal University; Sichuan Normal University	0944-1344	2022	10.1007/s11356-021-18336-y
Zhang, L; Yan, CZ; Qi, R; Yang, F	Quantifying the contribution rates of sulfonamide antibiotics removal mechanisms in constructed wetlands using multivariate statistical analysis*	ENVIRONMENTAL POLLUTION	Article	Chinese Academy of Sciences; Institute of Urban Environment, CAS; Chinese Academy of Sciences; University of Chinese Academy of Sciences, CAS	0269-7491	2022	10.1016/j.envpol.2021.118463
Vaughn, DR; Kellerman, AM; Wickland, KP; Striegl, RG; Podgorski, DC; Hawkings, JR; Nienhuis, JH; Dornblaser, MM; Stets, EG; Spencer, RGM	Anthropogenic landcover impacts fluvial dissolved organic matter composition in the Upper Mississippi River Basin	BIOGEOCHEMISTRY	Article	State University System of Florida; Florida State University; United States Department of the Interior; United States Geological Survey; University of Louisiana System; University of New Orleans; University of Pennsylvania; Utrecht University; United States Department of the Interior; United States Geological Survey	0168-2563	2023	10.1007/s10533-021-00852-1
Wang, Y; Wang, XF; Yin, LC; Feng, XM; Zhou, CW; Han, L; Lu, YH	Determination of conservation priority areas in Qinghai Tibet Plateau based on ecosystem services	ENVIRONMENTAL SCIENCE & POLICY	Article	Chang'an University; Chang'an University; Chinese Academy of Sciences; Institute of Geographic Sciences & Natural Resources Research, CAS; Chinese Academy of Sciences; Research Center for Eco-Environmental Sciences (RCEES)	1462-9011	2021	10.1016/j.envsci.2021.07.019
Wang, L; Yang, DG; Ma, F; Wang, G; You, YQ	Recent advances in responses of arbuscular mycorrhizal fungi-Plant symbiosis to engineered nanoparticles	CHEMOSPHERE	Article	Harbin Institute of Technology	0045-6535	2022	10.1016/j.chemosphere.2021.131644
Zhou, ZY; Huang, JY; Danish, M; Zeng, GL; Yang, RM; Gu, XG; Ali, M; Lyu, SG	Insights into enhanced removal of 1,2-dichloroethane by amorphous boron-enhanced Fenton system: Performances and mechanisms	JOURNAL OF HAZARDOUS MATERIALS	Article	East China University of Science & Technology	0304-3894	2021	10.1016/j.jhazmat.2021.126589
Tofful, L; Canepari, S; Sargolini, T; Perrino, C	Indoor air quality in a domestic environment: Combined contribution of indoor and outdoor PM sources	BUILDING AND ENVIRONMENT	Article	Consiglio Nazionale delle Ricerche (CNR); Istituto Sull'inquinamento Atmosferico (IIA-CNR); Sapienza University Rome	0360-1323	2021	10.1016/j.buildenv.2021.108050
Li, K; Hou, Y; Andersen, PS; Xin, RH; Rong, YJ; Skov-Petersen, H	Identifying the potential areas of afforestation projects using cost-benefit analysis based on ecosystem services and farmland suitability: A case study of the Grain for Green Project in Jinan, China	SCIENCE OF THE TOTAL ENVIRONMENT	Article	University of Copenhagen; Chinese Academy of Sciences; Research Center for Eco-Environmental Sciences (RCEES); Chinese Academy of Sciences; University of Chinese Academy of Sciences, CAS; Tianjin University	0048-9697	2021	10.1016/j.scitotenv.2021.147542
Tang, JF; Wang, WD; Feng, JY; Yang, L; Ruan, T; Xu, YY	Urban green infrastructure features influence the type and chemical composition of soil dissolved organic matter	SCIENCE OF THE TOTAL ENVIRONMENT	Article	Chinese Academy of Sciences; Institute of Urban Environment, CAS; Chinese Academy of Sciences; Chinese Academy of Sciences; Research Center for Eco-Environmental Sciences (RCEES)	0048-9697	2021	10.1016/j.scitotenv.2020.144240
Dai, JQ; Cai, XP; Jin, JH; Ge, W; Huang, YM; Wu, W; Xia, TQ; Li, FS; Zuo, XX	Earliest arrival of millet in the South China coast dating back to 5,500 years ago	JOURNAL OF ARCHAEOLOGICAL SCIENCE	Article	Fujian Normal University; Fujian Normal University; Fujian Normal University; Xiamen University; Minjiang University; Fujian University of Technology	0305-4403	2021	10.1016/j.jas.2021.105356
Huang, R; Lan, T; Song, X; Li, J; Ling, J; Deng, OP; Wang, CQ; Gao, XS; Li, QQ; Tang, XY; Tao, Q; Zeng, M	Soil labile organic carbon impacts C:N:P stoichiometry in urban park green spaces depending on vegetation types and time after planting	APPLIED SOIL ECOLOGY	Article	Sichuan Agricultural University	0929-1393	2021	10.1016/j.apsoil.2021.103926
Sun, XD; Wang, G; Ma, QX; Liao, JH; Wang, D; Guan, QW; Jones, DL	Organic mulching promotes soil organic carbon accumulation to deep soil layer in an urban plantation forest	FOREST ECOSYSTEMS	Article	Nanjing Forestry University; Bangor University; China West Normal University; University of Western Australia	2095-6355	2021	10.1186/s40663-020-00278-5
Gao, JB; Zuo, LY	Revealing ecosystem services relationships and their driving factors for five basins of Beijing	JOURNAL OF GEOGRAPHICAL SCIENCES	Article	Chinese Academy of Sciences; Institute of Geographic Sciences & Natural Resources Research, CAS; Chinese Academy of Sciences; University of Chinese Academy of Sciences, CAS	1009-637X	2021	10.1007/s11442-021-1835-y
Gao, B; Li, YY; Zheng, NG; Liu, CC; Ren, HY; Yao, HY	Microbial functional CO2 emissions	ENVIRONMENTAL RESEARCH	Article	Chinese Academy of Sciences; Institute of Urban Environment, CAS; Chinese Academy of Sciences; University of Chinese Academy of Sciences, CAS; Wuhan Institute of Technology	0013-9351	2022	10.1016/j.envres.2022.113728
Shi, CC; Zhu, XP; Wu, HW; Li, ZH	Assessment of Urban Ecological Resilience and Its Influencing Factors: A Case Study of the Beijing-Tianjin-Hebei Urban Agglomeration of China	LAND	Article	Capital University of Economics & Business; Chinese Academy of Sciences; Institute of Geographic Sciences & Natural Resources Research, CAS; Capital University of Economics & Business; Hebei Normal University of Science & Technology; Beijing Forestry University; Chinese Academy of Sciences; University of Chinese Academy of Sciences, CAS		2022	10.3390/land11060921
Elliot, T; Torres-Matallana, JA; Goldstein, B; Almenar, JB; Baggethun, EG; Proenca, V; Rugani, B	An expanded framing of ecosystem services is needed for a sustainable urban future	RENEWABLE & SUSTAINABLE ENERGY REVIEWS	Article	University of Quebec; Ecole de Technologie Superieure - Canada; Universidade de Lisboa; Instituto Superior Tecnico; Luxembourg Institute of Science & Technology; Wageningen University & Research; McGill University; Norwegian University of Life Sciences; Norwegian Institute Nature Research; Norwegian University of Life Sciences	1364-0321	2022	10.1016/j.rser.2022.112418
Chen, SY; Lu, N; Fu, BJ; Wang, S; Deng, L; Wang, LX	Current and future carbon stocks of natural forests in China	FOREST ECOLOGY AND MANAGEMENT	Article	Beijing Normal University; Chinese Academy of Sciences; Research Center for Eco-Environmental Sciences (RCEES); Northwest A&F University - China; Chinese Academy of Sciences; Institute of Soil & Water Conservation (ISWC), CAS; Indiana University System; Indiana University-Purdue University Indianapolis	0378-1127	2022	10.1016/j.foreco.2022.120137
Jiang, ZW; Yang, SH; Chen, X; Pang, QQ; Xu, Y; Qi, ST; Yu, WQ; Dai, HD	Controlled release urea improves rice production and reduces environmental pollution: a research based on meta-analysis and machine learning	ENVIRONMENTAL SCIENCE AND POLLUTION RESEARCH	Article	Hohai University; Hohai University; Hohai University	0944-1344	2022	10.1007/s11356-021-15956-2
Xie, YC; Hou, ZM; Liu, HJ; Cao, C; Qi, JG	The sustainability assessment of CO2 capture, utilization and storage (CCUS) and the conversion of cropland to forestland program (CCFP) in the Water-Energy-Food (WEF) framework towards China's carbon neutrality by 2060	ENVIRONMENTAL EARTH SCIENCES	Article	Michigan State University; Michigan State University; TU Clausthal; TU Clausthal; Chinese Academy of Sciences; Wuhan Institute of Rock & Soil Mechanics, CAS; Southwest Petroleum University	1866-6280	2021	10.1007/s12665-021-09762-9
Shen, CC; He, JZ; Ge, Y	Seasonal dynamics of soil microbial diversity and functions along elevations across the treeline	SCIENCE OF THE TOTAL ENVIRONMENT	Article	Chinese Academy of Sciences; Research Center for Eco-Environmental Sciences (RCEES); Chinese Academy of Sciences; University of Chinese Academy of Sciences, CAS; Fujian Normal University	0048-9697	2021	10.1016/j.scitotenv.2021.148644
Marvin, CH; Berthiaume, A; Burniston, DA; Chibwe, L; Dove, A; Evans, M; Hewitt, LM; Hodson, PV; Muir, DCG; Parrott, J; Thomas, PJ; Tomy, GT	Polycyclic aromatic compounds in the Canadian Environment: Aquatic and terrestrial environments	ENVIRONMENTAL POLLUTION	Article	Environment & Climate Change Canada; Environment & Climate Change Canada; Environment & Climate Change Canada; Queens University - Canada; Environment & Climate Change Canada; Canadian Wildlife Service; National Wildlife Research Centre - Canada; University of Manitoba	0269-7491	2021	10.1016/j.envpol.2021.117442
Hu, BF; Zhou, Q; He, CY; Duan, LX; Li, WY; Zhang, GL; Ji, WJ; Peng, J; Xie, HX	Spatial variability and potential controls of soil organic matter in the Eastern Dongting Lake Plain in southern China	JOURNAL OF SOILS AND SEDIMENTS	Article	Hunan Agricultural University; Jiangxi University of Finance & Economics; INRAE; China Agricultural University; Tarim University	1439-0108	2021	10.1007/s11368-021-02906-1
Luo, YL; Shen, J; Chen, AF; Tao, Q; Li, QQ; White, PJ; Li, TQ; Li, B; Chen, L; Li, HX; Gao, XS; Xu, Q; Wang, CQ	Loss of organic carbon in suburban soil upon urbanization of Chengdu megacity, China	SCIENCE OF THE TOTAL ENVIRONMENT	Article	Sichuan Agricultural University; Southern University of Science & Technology; James Hutton Institute; Zhejiang University; Sichuan Agricultural University; Sichuan Agricultural University	0048-9697	2021	10.1016/j.scitotenv.2021.147209
Yan, ZZ; Chen, QL; Li, CY; Nguyen, BAT; Zhu, YG; He, JZ; Hu, HW	Biotic and abiotic factors distinctly drive contrasting biogeographic patterns between phyllosphere and soil resistomes in natural ecosystems	ISME COMMUNICATIONS	Article	University of Melbourne; Chinese Academy of Sciences; Institute of Urban Environment, CAS		2021	10.1038/s43705-021-00012-4
Yin, LM; Dijkstra, FA; Phillips, RP; Zhu, BA; Wang, P; Cheng, WX	Arbuscular mycorrhizal trees cause a higher carbon to nitrogen ratio of soil organic matter decomposition via rhizosphere priming than ectomycorrhizal trees	SOIL BIOLOGY & BIOCHEMISTRY	Article	Chinese Academy of Sciences; Shenyang Institute of Applied Ecology, CAS; University of Sydney; Indiana University System; Indiana University Bloomington; Peking University; Peking University; University of California System; University of California Santa Cruz	0038-0717	2021	10.1016/j.soilbio.2021.108246
Hu, YH; Yesilonis, I; Szlavecz, K	Microbial and environmental controls on wood decomposition in deciduous forests of different ages	APPLIED SOIL ECOLOGY	Article	Johns Hopkins University; United States Department of Agriculture (USDA); United States Forest Service; Chinese Academy of Sciences; Research Center for Eco-Environmental Sciences (RCEES)	0929-1393	2021	10.1016/j.apsoil.2021.103986
Zuo, YP; Zhang, HJ; Li, JP; Yao, XD; Chen, XY; Zeng, H; Wang, W	The effect of soil depth on temperature sensitivity of extracellular enzyme activity decreased with elevation: Evidence from mountain grassland belts	SCIENCE OF THE TOTAL ENVIRONMENT	Article	Peking University; Peking University; Peking University	0048-9697	2021	10.1016/j.scitotenv.2021.146136
Min, D; Wu, J; Cheng, L; Liu, DF; Lau, TC; Yu, HQ	Dependence of arsenic resistance and reduction capacity of Aeromonas hydrophila on carbon substrate	JOURNAL OF HAZARDOUS MATERIALS	Article	Chinese Academy of Sciences; University of Science & Technology of China, CAS; City University of Hong Kong; Chinese Academy of Sciences; University of Science & Technology of China, CAS	0304-3894	2021	10.1016/j.jhazmat.2020.123611
Sánchez-Piñero, J; Moreda-Piñeiro, J; Concha-Graña, E; Fernández-Amado, M; Muniategui-Lorenzo, S; López-Mahía, P	Inhalation bioaccessibility estimation of polycyclic aromatic hydrocarbons from atmospheric particulate matter (PM10): Influence of PM10 composition and health risk assessment	CHEMOSPHERE	Article	Universidade da Coruna; Centro interdisciplinar de Quimica e Bioloxia CICA	0045-6535	2021	10.1016/j.chemosphere.2020.127847
Liu, J; Qiu, TY; Peñuelas, J; Sardans, J; Tan, WF; Wei, XM; Cui, YX; Cui, QL; Wu, CF; Liu, LF; Zhou, BT; He, HR; Fang, LC	Crop residue return sustains global soil ecological stoichiometry balance	GLOBAL CHANGE BIOLOGY	Article	Central China Normal University; Leibniz Institut fur Gewasserokologie und Binnenfischerei (IGB); Chinese Academy of Sciences; Northwest A&F University - China; Centro de Investigacion Ecologica y Aplicaciones Forestales (CREAF-CERCA); Autonomous University of Barcelona; Consejo Superior de Investigaciones Cientificas (CSIC); Centro de Investigacion Ecologica y Aplicaciones Forestales (CREAF-CERC…	1354-1013	2023	10.1111/gcb.16584
Deines, JM; Guan, KY; Lopez, B; Zhou, Q; White, CS; Wang, S; Lobell, DB	Recent cover crop adoption is associated with small maize and soybean yield losses in the United States	GLOBAL CHANGE BIOLOGY	Article	Stanford University; Stanford University; University of Illinois System; University of Illinois Urbana-Champaign; University of Illinois System; University of Illinois Urbana-Champaign; University of Illinois System; University of Illinois Urbana-Champaign; University of North Carolina; North Carolina Central University	1354-1013	2023	10.1111/gcb.16489
Hu, BF; Xie, MD; Li, HY; Zhao, WR; Hu, J; Jiang, YF; Ji, WJ; Li, S; Hong, YS; Yang, MH; Optiz, T; Shi, Z	Stoichiometry of soil carbon, nitrogen, and phosphorus in farmland soils in southern China: Spatial pattern and related dominates	CATENA	Article	Jiangxi University of Finance & Economics; University of Wisconsin System; University of Wisconsin Madison; Zhejiang University; Zhejiang University; China Agricultural University; Central China Normal University; INRAE	0341-8162	2022	10.1016/j.catena.2022.106468
Yin, Y; Wang, XJ; Hu, YA; Li, FD; Cheng, HF	Soil bacterial community structure in the habitats with different levels of heavy metal pollution at an abandoned polymetallic mine	JOURNAL OF HAZARDOUS MATERIALS	Article	Peking University; Chinese Academy of Sciences; Guangzhou Institute of Geochemistry, CAS; China University of Geosciences; Chinese Academy of Sciences; Institute of Geographic Sciences & Natural Resources Research, CAS	0304-3894	2023	10.1016/j.jhazmat.2022.130063
Zhang, QF; Feng, JG; Li, J; Huang, CY; Shen, YW; Cheng, WX; Zhu, BA	A distinct sensitivity to the priming effect between labile and stable soil organic carbon	NEW PHYTOLOGIST	Article	Peking University; Peking University; University of California System; University of California Santa Cruz	0028-646X	2023	10.1111/nph.18458
Zhao, J; Shao, Z; Xia, CY; Fang, K; Chen, R; Zhou, J	Ecosystem services assessment based on land use simulation: A case study in the Heihe River Basin, China	ECOLOGICAL INDICATORS	Article	Beijing Forestry University; Beijing University of Technology; Zhejiang University	1470-160X	2022	10.1016/j.ecolind.2022.109402
Zhang, H; Deng, W; Zhang, SY; Peng, L; Liu, Y	Impacts of urbanization on ecosystem services in the Chengdu-Chongqing Urban Agglomeration: Changes and trade-offs	ECOLOGICAL INDICATORS	Article	Chinese Academy of Sciences; Institute of Mountain Hazards & Environment, CAS; Sichuan Normal University; Chinese Academy of Sciences; University of Chinese Academy of Sciences, CAS	1470-160X	2022	10.1016/j.ecolind.2022.108920
Ma, SH; Zhu, B; Chen, GP; Ni, XF; Zhou, LH; Su, HJ; Cai, Q; Chen, X; Zhu, JL; Ji, CJ; Li, YD; Fang, JY	Loss of soil microbial residue carbon by converting a tropical forest to tea plantation	SCIENCE OF THE TOTAL ENVIRONMENT	Article	Peking University; Fujian Normal University; Chinese Academy of Sciences; Institute of Atmospheric Physics, CAS; Chinese Academy of Forestry; Research Institute of Tropical Forestry, CAF	0048-9697	2022	10.1016/j.scitotenv.2021.151742
Zhang, WM; Wei, FL; Horion, S; Fensholt, R; Forkel, M; Brandt, M	Global quantification of the bidirectional dependency between soil moisture and vegetation productivity	AGRICULTURAL AND FOREST METEOROLOGY	Article	University of Copenhagen; Chinese Academy of Sciences; Research Center for Eco-Environmental Sciences (RCEES); Technische Universitat Dresden	0168-1923	2022	10.1016/j.agrformet.2021.108735
Zhou, S; Lin, JJ; Wang, P; Zhu, P; Zhu, B	Resistant soil organic carbon is more vulnerable to priming by root exudate fractions than relatively active soil organic carbon	PLANT AND SOIL	Article	Chongqing Three Gorges University; Chinese Academy of Sciences; Shenyang Institute of Applied Ecology, CAS; Jilin Academy of Agricultural Sciences; Peking University	0032-079X	2023	10.1007/s11104-021-05288-y
Cai, WL; Wang, FH; Chen, CF; Chen, S; Liu, J; Ren, ZL; Shao, HB	Long-term performance evaluation for deep borehole heat exchanger array under different soil thermal properties and system layouts	ENERGY	Article	Xi'an Jiaotong University; Helmholtz Association; Helmholtz Center for Environmental Research (UFZ); Ministry of Natural Resources of the People's Republic of China; Northwest University Xi'an	0360-5442	2022	10.1016/j.energy.2021.122937
Zhang, Y; Ma, J; O'Connor, P; Zhu, YG	Microbial communities on biodegradable plastics under different fertilization practices in farmland soil microcosms	SCIENCE OF THE TOTAL ENVIRONMENT	Article	Chinese Academy of Sciences; Research Center for Eco-Environmental Sciences (RCEES); Chinese Academy of Sciences; University of Chinese Academy of Sciences, CAS; Chinese Academy of Sciences; Institute of Urban Environment, CAS; Chinese Academy of Sciences; Institute of Urban Environment, CAS; University of Adelaide	0048-9697	2022	10.1016/j.scitotenv.2021.152184
Meo, SA; Almutairi, FJ; Abukhalaf, AA; Usmani, AM	Effect of Green Space Environment on Air Pollutants PM2.5, PM10, CO, O3, and Incidence and Mortality of SARS-CoV-2 in Highly Green and Less-Green Countries	INTERNATIONAL JOURNAL OF ENVIRONMENTAL RESEARCH AND PUBLIC HEALTH	Article	King Saud University; King Saud University		2021	10.3390/ijerph182413151
Hu, X; Xie, TT; Arif, M; Ding, DD; Li, JJ; Yuan, ZX; Li, CX	Response of Annual Herbaceous Plant Leaching and Decomposition to Periodic Submergence in Mega-Reservoirs: Changes in Litter Nutrients and Soil Properties for Restoration	BIOLOGY-BASEL	Article	Southwest University - China		2021	10.3390/biology10111141
Xing, AJ; Du, EZ; Shen, HH; Xu, LC; de Vries, W; Zhao, MY; Liu, XY; Fang, JY	Nonlinear responses of ecosystem carbon fluxes to nitrogen deposition in an old-growth boreal forest	ECOLOGY LETTERS	Article	Chinese Academy of Sciences; Institute of Botany, CAS; Chinese Academy of Sciences; University of Chinese Academy of Sciences, CAS; Beijing Normal University; Wageningen University & Research; Peking University; Peking University	1461-023X	2022	10.1111/ele.13906
Wang, C; Ning, P; Li, JY; Wei, XM; Ge, TD; Cui, YX; Deng, XP; Jiang, YL; Shen, WJ	Responses of soil microbial community composition and enzyme activities to long-term organic amendments in a continuous tobacco cropping system	APPLIED SOIL ECOLOGY	Article	Guangxi University; China National Tobacco Corporation; Southwest Forestry University - China; Chinese Academy of Sciences; Institute of Subtropical Agriculture, CAS; Chinese Academy of Sciences; Institute of Subtropical Agriculture, CAS; Ningbo University; Peking University	0929-1393	2022	10.1016/j.apsoil.2021.104210
Huang, YY; Ciais, P; Santoro, M; Makowski, D; Chave, J; Schepaschenko, D; Abramoff, RZ; Goll, DS; Yang, H; Chen, Y; Wei, W; Piao, SL	A global map of root biomass across the world's forests	EARTH SYSTEM SCIENCE DATA	Article	UDICE-French Research Universities; Universite Paris Saclay; CEA; Centre National de la Recherche Scientifique (CNRS); Universite Paris Cite; Commonwealth Scientific & Industrial Research Organisation (CSIRO); GAMMA Remote Sensing AG; AgroParisTech; UDICE-French Research Universities; Universite Paris Saclay; INRAE; Ecole des Ponts ParisTech; UDICE-French Research Universities; Universite Paris S…	1866-3508	2021	10.5194/essd-13-4263-2021
Dong, HX; Zhang, S; Lin, JJ; Zhu, B	Responses of soil microbial biomass carbon and dissolved organic carbon to drying-rewetting cycles: A meta-analysis	CATENA	Article	Chongqing Three Gorges University; Zhejiang University; Peking University; Peking University	0341-8162	2021	10.1016/j.catena.2021.105610
Xu, BL; Liu, F; Alfaro, D; Jin, Z; Liu, YY; Liu, Y; Zhou, ZY; Zhang, JM	Polycyclic aromatic hydrocarbons in fine road dust from a coal-utilization city: Spatial distribution, source diagnosis and risk assessment	CHEMOSPHERE	Article	Chinese Academy of Sciences; Hefei Institutes of Physical Science, CAS; Zhejiang University; Guangzhou University; University of California System; University of California Riverside; Chinese Academy of Sciences; University of Science & Technology of China, CAS; Free University of Berlin	0045-6535	2022	10.1016/j.chemosphere.2021.131555
Siarudin, M; Rahman, SA; Artati, Y; Indrajaya, Y; Narulita, S; Ardha, MJ; Larjavaara, M	Carbon Sequestration Potential of Agroforestry Systems in Degraded Landscapes in West Java, Indonesia	FORESTS	Article	Ministry of Environment & Forestry; Peking University; Peking University; CGIAR; Center for International Forestry Research (CIFOR); Ministry of Environment & Forestry		2021	10.3390/f12060714
Sharma, SK; Mukherjee, S; Choudhary, N; Rai, A; Ghosh, A; Chatterjee, A; Vijayan, N; Mandal, TK	Seasonal variation and sources of carbonaceous species and elements in PM2.5 and PM10 over the eastern Himalaya	ENVIRONMENTAL SCIENCE AND POLLUTION RESEARCH	Article	Council of Scientific & Industrial Research (CSIR) - India; CSIR - National Physical Laboratory (NPL); Academy of Scientific & Innovative Research (AcSIR)	0944-1344	2021	10.1007/s11356-021-14361-z
Dobson, MC; Crispo, M; Blevins, RS; Warren, PH; Edmondson, JL	An assessment of urban horticultural soil quality in the United Kingdom and its contribution to carbon storage	SCIENCE OF THE TOTAL ENVIRONMENT	Article	University of Sheffield	0048-9697	2021	10.1016/j.scitotenv.2021.146199
Wang, C; Masoudi, A; Wang, M; Yang, J; Yu, ZJ; Liu, JZ	Land-use types shape soil microbial compositions under rapid urbanization in the Xiong'an New Area, China	SCIENCE OF THE TOTAL ENVIRONMENT	Article	Hebei Normal University	0048-9697	2021	10.1016/j.scitotenv.2021.145976
Dayathilake, DDTL; Lokupitiya, E; Wijeratne, VPIS	Estimation of Soil Carbon Stocks of Urban Freshwater Wetlands in the Colombo Ramsar Wetland City and their Potential Role in Climate Change Mitigation	WETLANDS	Article	University of Colombo; University of Colombo	0277-5212	2021	10.1007/s13157-021-01424-7
Khan, HS; Santamouris, M; Paolini, R; Caccetta, P; Kassomenos, P	Analyzing the local and climatic conditions affecting the urban overheating magnitude during the Heatwaves (HWs) in a coastal city: A case study of the greater Sydney region	SCIENCE OF THE TOTAL ENVIRONMENT	Article	University of New South Wales Sydney; Commonwealth Scientific & Industrial Research Organisation (CSIRO); University of Ioannina	0048-9697	2021	10.1016/j.scitotenv.2020.142515
Nicese, FP; Colangelo, G; Comolli, R; Azzini, L; Lucchetti, S; Marziliano, PA; Sanesi, G	Estimating CO2 balance through the Life Cycle Assessment prism: A case - Study in an urban park	URBAN FORESTRY & URBAN GREENING	Article	University of Florence; Universita degli Studi di Bari Aldo Moro; University of Milano-Bicocca; Universita Mediterranea di Reggio Calabria	1618-8667	2021	10.1016/j.ufug.2020.126869
Chiriacò, MV; Valentini, R	A land-based approach for climate change mitigation in the livestock sector	JOURNAL OF CLEANER PRODUCTION	Article	Centro Euro-Mediterraneo sui Cambiamenti Climatici (CMCC); Tuscia University; Peoples Friendship University of Russia	0959-6526	2021	10.1016/j.jclepro.2020.124622
Romzaykina, ON; Vasenev, VI; Paltseva, A; Kuzyakov, YV; Neaman, A; Dovletyarova, EA	Assessing and mapping urban soils as geochemical barriers for contamination by heavy metal(loid)s in Moscow megapolis	JOURNAL OF ENVIRONMENTAL QUALITY	Article; Proceedings Paper	Peoples Friendship University of Russia; University of Louisiana Lafayette; University of Gottingen; Universidad Austral de Chile	0047-2425	2021	10.1002/jeq2.20142
Wang, MM; Guo, XW; Zhang, S; Xiao, LJ; Mishra, U; Yang, YH; Zhu, BA; Wang, GC; Mao, XL; Qian, T; Jiang, T; Shi, Z; Luo, ZK	Global soil profiles indicate depth-dependent soil carbon losses under a warmer climate	NATURE COMMUNICATIONS	Article	Zhejiang University; United States Department of Energy (DOE); Sandia National Laboratories; Chinese Academy of Sciences; Institute of Botany, CAS; Peking University; Peking University; Chinese Academy of Sciences; Institute of Atmospheric Physics, CAS; Zhejiang University; Zhejiang University		2022	10.1038/s41467-022-33278-w
Wang, XJ; Ren, YX; Yu, ZQ; Shen, GF; Cheng, HF; Tao, S	Effects of environmental factors on the distribution of microbial communities across soils and lake sediments in the Hoh Xil Nature Reserve of the Qinghai-Tibetan Plateau	SCIENCE OF THE TOTAL ENVIRONMENT	Article	Chinese Academy of Sciences; Guangzhou Institute of Geochemistry, CAS; Chinese Academy of Sciences; University of Chinese Academy of Sciences, CAS; Peking University	0048-9697	2022	10.1016/j.scitotenv.2022.156148
Jin, MK; Yang, YT; Zhao, CX; Huang, XR; Chen, HM; Zhao, WL; Yang, XR; Zhu, YG; Liu, HJ	ROS as a key player in quinolone antibiotic stress on Arabidopsis thaliana: From the perspective of photosystem function, oxidative stress and phyllosphere microbiome	SCIENCE OF THE TOTAL ENVIRONMENT	Article	Zhejiang Gongshang University; Chinese Academy of Sciences; Institute of Urban Environment, CAS; Chinese Academy of Sciences; Research Center for Eco-Environmental Sciences (RCEES); Imperial College London; Zhejiang Gongshang University	0048-9697	2022	10.1016/j.scitotenv.2022.157821
Qu, JH; Zhang, XB; Liu, SQ; Li, XJ; Wang, SY; Feng, ZH; Wu, ZH; Wang, L; Jiang, Z; Zhang, Y	One-step preparation of Fe/N co-doped porous biochar for chromium(VI) and bisphenol a decontamination in water: Insights to co-activation and adsorption mechanisms	BIORESOURCE TECHNOLOGY	Article	Chinese Academy of Sciences; Northeast Institute of Geography & Agroecology, CAS; Peking University	0960-8524	2022	10.1016/j.biortech.2022.127718
Xia, SP; Song, ZL; Van Zwieten, L; Guo, LD; Yu, CX; Wang, WQ; Li, Q; Hartley, IP; Yang, YH; Liu, HY; Wang, YD; Ran, XB; Liu, CQ; Wang, HL	Storage, patterns and influencing factors for soil organic carbon in coastal wetlands of China	GLOBAL CHANGE BIOLOGY	Article	Nanjing Agricultural University; Tianjin University; NSW Department of Primary Industries; University of Wisconsin System; University of Wisconsin Milwaukee; Linnaeus University; Fujian Normal University; University of Exeter; Chinese Academy of Sciences; Institute of Botany, CAS; Peking University; Tianjin Normal University; Ministry of Natural Resources of the People's Republic of China; Foshan…	1354-1013	2022	10.1111/gcb.16325
Dai, GH; Zhu, SS; Cai, Y; Zhu, ER; Jia, YF; Ji, CJ; Tang, ZY; Fang, JY; Feng, XJ	Plant-derived lipids play a crucial role in forest soil carbon accumulation	SOIL BIOLOGY & BIOCHEMISTRY	Article	Chinese Academy of Sciences; Institute of Botany, CAS; Chinese Academy of Sciences; University of Chinese Academy of Sciences, CAS; Peking University	0038-0717	2022	10.1016/j.soilbio.2022.108645
Zhao, FZ; Wang, JY; Li, Y; Xu, XF; He, LY; Wang, J; Ren, CJ; Guo, YX	Microbial functional genes driving the positive priming effect in forest soils along an elevation gradient	SOIL BIOLOGY & BIOCHEMISTRY	Article	Northwest University Xi'an; Northwest University Xi'an; California State University System; San Diego State University; Chinese Academy of Sciences; Institute of Soil & Water Conservation (ISWC), CAS; Ministry of Water Resources; Northwest A&F University - China; Northwest University Xi'an	0038-0717	2022	10.1016/j.soilbio.2021.108498
Li, L; Pan, CZ; Ling, S; Li, MQ	Ecological Efficiency of Urban Industrial Land in Metropolitan Areas: Evidence from China	LAND	Article	Tianjin University		2022	10.3390/land11010104
McGlynn, E; Li, S; Berger, MF; Amend, M; Harper, KL	Addressing uncertainty and bias in land use, land use change, and forestry greenhouse gas inventories	CLIMATIC CHANGE	Article	University of California System; University of California Davis; Industrial Economics, Incorporated	0165-0009	2022	10.1007/s10584-021-03254-2
Zhao, YH; Wang, N; Luo, YH; He, HS; Wu, L; Wang, HL; Wang, QT; Wu, JS	Quantification of ecosystem services supply-demand and the impact of demographic change on cultural services in Shenzhen, China	JOURNAL OF ENVIRONMENTAL MANAGEMENT	Article	Peking University; Peking University; Ministry of Natural Resources of the People's Republic of China; Inner Mongolia University; Hebei University of Engineering	0301-4797	2022	10.1016/j.jenvman.2021.114280
Chien, SC; Krumins, JA	Natural versus urban global soil organic carbon stocks: A meta-analysis	SCIENCE OF THE TOTAL ENVIRONMENT	Article	Montclair State University; Montclair State University	0048-9697	2022	10.1016/j.scitotenv.2021.150999
Liu, LY; Chen, XZ; Ciais, P; Yuan, WP; Maignan, F; Wu, J; Piao, SL; Wang, YP; Wigneron, JP; Fan, L; Gentine, P; Yang, XQ; Gong, FX; Liu, H; Wang, C; Tang, XL; Yang, H; Ye, Q; He, B; Shang, JL; Su, YX	Tropical tall forests are more sensitive and vulnerable to drought than short forests	GLOBAL CHANGE BIOLOGY	Article	Sun Yat Sen University; Southern Marine Science & Engineering Guangdong Laboratory; Southern Marine Science & Engineering Guangdong Laboratory (Zhuhai); Guangdong Academy of Sciences; Guangzhou Institute of Geography, Guangdong Academy of Sciences; UDICE-French Research Universities; Universite Paris Cite; Universite Paris Saclay; CEA; Centre National de la Recherche Scientifique (CNRS); Universi…	1354-1013	2022	10.1111/gcb.16017
Chen, Y; Han, MG; Yuan, X; Hou, YH; Qin, WK; Zhou, HK; Zhao, XQ; Klein, JA; Zhu, BA	Warming has a minor effect on surface soil organic carbon in alpine meadow ecosystems on the Qinghai-Tibetan Plateau	GLOBAL CHANGE BIOLOGY	Article	Peking University; Peking University; Chinese Academy of Sciences; Colorado State University	1354-1013	2022	10.1111/gcb.15984
Li, YJ; Zheng, Q; Yang, R; Zhuang, S; Lin, W; Li, YZ	Evaluating microbial role in reducing N2O emission by dual isotopocule mapping following substitution of inorganic fertilizer for organic fertilizer	JOURNAL OF CLEANER PRODUCTION	Article	Chinese Academy of Agricultural Sciences; Institute of Urban Agriculture, CAAS; Ministry of Agriculture & Rural Affairs; Chinese Academy of Agricultural Sciences; Institute of Environment & Sustainable Development in Agriculture, CAAS; Chinese Academy of Agricultural Sciences	0959-6526	2021	10.1016/j.jclepro.2021.129442
Ding, DD; Liu, MH; Arif, M; Yuan, ZX; Li, JJ; Hu, X; Zheng, J; Li, CX	Responses of Ecological Stoichiometric Characteristics of Carbon, Nitrogen, and Phosphorus to Periodic Submergence in Mega-Reservoir: Growth of Taxodium distichum and Taxodium ascendens	PLANTS-BASEL	Article	Southwest University - China		2021	10.3390/plants10102040
Hu, BA; Zhang, ZJ; Han, HR; Li, ZZ; Cheng, XQ; Kang, FF; Wu, HF	The Grain for Green Program Intensifies Trade-Offs between Ecosystem Services in Midwestern Shanxi, China	REMOTE SENSING	Article	Beijing Forestry University; Chinese Academy of Sciences; Research Center for Eco-Environmental Sciences (RCEES)		2021	10.3390/rs13193966
Liu, L; Estiarte, M; Bengtson, P; Li, J; Asensio, D; Wallander, H; Peñuelas, J	Drought legacies on soil respiration and microbial community in a Mediterranean forest soil under different soil moisture and carbon inputs	GEODERMA	Article	Nanjing University of Information Science & Technology; Centro de Investigacion Ecologica y Aplicaciones Forestales (CREAF-CERCA); Centro de Investigacion Ecologica y Aplicaciones Forestales (CREAF-CERCA); Consejo Superior de Investigaciones Cientificas (CSIC); Lund University; Chinese Academy of Sciences; Institute of Urban Environment, CAS	0016-7061	2022	10.1016/j.geoderma.2021.115425
Li, CX; Xie, SY; Wang, Y; Jiang, RQ; Wang, XD; Lv, N; Pan, XF; Cai, GJ; Yu, GW; Wang, Y	Multi-functional biochar preparation and heavy metal immobilization by co-pyrolysis of livestock feces and biomass waste	WASTE MANAGEMENT	Article	Chinese Academy of Sciences; Institute of Urban Environment, CAS; Technical University of Denmark	0956-053X	2021	10.1016/j.wasman.2021.08.023
Song, J; Xia, JY; Hui, DF; Zheng, MM; Wang, J; Ru, JY; Wang, HD; Zhang, QS; Yang, C; Wan, SQ	Plant functional types regulate non-additive responses of soil respiration to 5-year warming and nitrogen addition in a semi-arid grassland	FUNCTIONAL ECOLOGY	Article	Hebei University; East China Normal University; East China Normal University; Tennessee State University; Henan Normal University	0269-8463	2021	10.1111/1365-2435.13902
Hale, L; Curtis, D; Azeem, M; Montgomery, J; Crowley, DE; McGiffen, ME	Influence of compost and biochar on soil biological properties under turfgrass supplied deficit irrigation	APPLIED SOIL ECOLOGY	Article	United States Department of Agriculture (USDA); Chinese Academy of Sciences; California State University System; California State Polytechnic University, Humboldt; University of California System; University of California Riverside; University of California System; University of California Riverside	0929-1393	2021	10.1016/j.apsoil.2021.104134
Meena, BP; Biswas, AK; Singh, M; Das, H; Chaudhary, RS; Singh, AB; Shirale, AO; Patra, AK	Energy budgeting and carbon footprint in long-term integrated nutrient management modules in a cereal- legume (Zea mays - Cicer arietinum) cropping system	JOURNAL OF CLEANER PRODUCTION	Article	Indian Council of Agricultural Research (ICAR); ICAR - Indian Institute of Soil Sciences; Indian Council of Agricultural Research (ICAR); ICAR - Indian Institute of Soil Sciences; Indian Council of Agricultural Research (ICAR); ICAR - Indian Institute of Soil Sciences	0959-6526	2021	10.1016/j.jclepro.2021.127900
Wu, D; Lin, JC; Duarte, HF; Yadav, V; Parazoo, NC; Oda, T; Kort, EA	A model for urban biogenic CO2 fluxes: Solar-Induced Fluorescence for Modeling Urban biogenic Fluxes (SMUrF v1)	GEOSCIENTIFIC MODEL DEVELOPMENT	Article	Utah System of Higher Education; University of Utah; National Aeronautics & Space Administration (NASA); NASA Jet Propulsion Laboratory (JPL); California Institute of Technology; Universities Space Research Association (USRA); National Aeronautics & Space Administration (NASA); NASA Goddard Space Flight Center; University System of Maryland; University of Maryland College Park; University of Mich…	1991-959X	2021	10.5194/gmd-14-3633-2021
Kim, YJ; Hyun, J; Yoo, SY; Yoo, G	The role of biochar in alleviating soil drought stress in urban roadside greenery	GEODERMA	Article	Korea Polar Research Institute (KOPRI); Kyung Hee University; Korea Forest Research Institute (KFRI); National Institute of Forest Science (NIFOS), Republic of South Korea; Kyung Hee University	0016-7061	2021	10.1016/j.geoderma.2021.115223
Chen, Y; Han, MG; Yuan, X; Cao, GM; Zhu, BA	Seasonal changes in soil properties, microbial biomass and enzyme activities across the soil profile in two alpine ecosystems	SOIL ECOLOGY LETTERS	Article	Peking University; Peking University; Chinese Academy of Sciences	2662-2289	2021	10.1007/s42832-021-0101-7
Zhang, XW; Zhu, B; Yu, FH; Cheng, WX	Plant inputs mediate the linkage between soil carbon and net nitrogen mineralization	SCIENCE OF THE TOTAL ENVIRONMENT	Article	Taizhou University; Peking University; Peking University; University of California System; University of California Santa Cruz	0048-9697	2021	10.1016/j.scitotenv.2021.148208
Wang, MY; Lu, N; An, NN; Fu, BJ	A Trait-Based Approach for Understanding Changes in Carbon Sequestration in Semi-Arid Grassland During Succession	ECOSYSTEMS	Article	Chinese Academy of Sciences; Research Center for Eco-Environmental Sciences (RCEES); Chinese Academy of Sciences; University of Chinese Academy of Sciences, CAS; Beijing Normal University	1432-9840	2022	10.1007/s10021-021-00646-4
Zhou, Y; West, CP; Hettiyadura, APS; Niu, XY; Wen, H; Cui, JC; Shi, TL; Pu, W; Wang, X; Laskin, A	Measurement report: Molecular composition, optical properties, and radiative effects of water-soluble organic carbon in snowpack samples from northern Xinjiang, China	ATMOSPHERIC CHEMISTRY AND PHYSICS	Article	Lanzhou University; Purdue University System; Purdue University West Lafayette Campus; Purdue University; Purdue University System; Purdue University West Lafayette Campus; Purdue University; Tianjin University	1680-7316	2021	10.5194/acp-21-8531-2021
Vasenev, V; Varentsov, M; Konstantinov, P; Romzaykina, O; Kanareykina, I; Dvornikov, Y; Manukyan, V	Projecting urban heat island effect on the spatial-temporal variation of microbial respiration in urban soils of Moscow megalopolis	SCIENCE OF THE TOTAL ENVIRONMENT	Article	Peoples Friendship University of Russia; Wageningen University & Research; Lomonosov Moscow State University; Russian Academy of Sciences; Obukhov Institute of Atmospheric Physics of Russian Academy of Sciences	0048-9697	2021	10.1016/j.scitotenv.2021.147457
Stephanou, C; Omirou, M; Philippot, L; Zissimos, AM; Christoforou, IC; Trajanoski, S; Oulas, A; Ioannides, IM	Land use in urban areas impacts the composition of soil bacterial communities involved in nitrogen cycling. A case study from Lefkosia (Nicosia) Cyprus	SCIENTIFIC REPORTS	Article	INRAE; Universite de Bourgogne; Institut Agro; AgroSup Dijon; Medical University of Graz; Cyprus Institute of Neurology & Genetics	2045-2322	2021	10.1038/s41598-021-87623-y
Xu, MX; Chu, XY; Fu, YS; Wang, CJ; Wu, SH	Improving the accuracy of soil organic carbon content prediction based on visible and near-infrared spectroscopy and machine learning	ENVIRONMENTAL EARTH SCIENCES	Article	Ministry of Natural Resources of the People's Republic of China; Zhejiang Gongshang University; Zhejiang University of Finance & Economics	1866-6280	2021	10.1007/s12665-021-09582-x
Adelisardou, F; Jafari, HR; Malekmohammadi, B; Minkina, T; Zhao, WW; Karbassi, A	Impacts of land use and land cover change on the interactions among multiple soil-dependent ecosystem services (case study: Jiroft plain, Iran)	ENVIRONMENTAL GEOCHEMISTRY AND HEALTH	Article	University of Tehran; Swiss Federal Institutes of Technology Domain; Swiss Federal Institute of Aquatic Science & Technology (EAWAG); University of Copenhagen; Southern Federal University; Beijing Normal University	0269-4042	2021	10.1007/s10653-021-00875-5
Qu, LY; Wang, MG; Biere, A	Interactive Effects of Mycorrhizae, Soil Phosphorus, and Light on Growth and Induction and Priming of Defense in Plantago lanceolata	FRONTIERS IN PLANT SCIENCE	Article	Chinese Academy of Sciences; Research Center for Eco-Environmental Sciences (RCEES); Chinese Academy of Sciences; University of Chinese Academy of Sciences, CAS; Beijing Forestry University; Royal Netherlands Academy of Arts & Sciences; Netherlands Institute of Ecology (NIOO-KNAW)	1664-462X	2021	10.3389/fpls.2021.647372
Krause, S; Beach, TP; Luzzadder-Beach, S; Cook, D; Bozarth, SR; Valdez, F; Guderjan, TH	Tropical wetland persistence through the Anthropocene: Multiproxy reconstruction of environmental change in a Maya agroecosystem	ANTHROPOCENE	Article	Texas State University System; Texas State University San Marcos; University of Texas System; University of Texas Austin; Australian Catholic University; University of Kansas; University of Texas System; University of Texas Austin; University of Texas System; University of Texas at Tyler	2213-3054	2021	10.1016/j.ancene.2021.100284
Qi, XK; Li, QA; Yue, YM; Liao, CJ; Zhai, L; Zhang, XM; Wang, KL; Zhang, CH; Zhang, MY; Xiong, Y	Rural-Urban Migration and Conservation Drive the Ecosystem Services Improvement in China Karst: A Case Study of HuanJiang County, Guangxi	REMOTE SENSING	Article	Chinese Academy of Sciences; Institute of Subtropical Agriculture, CAS; Chinese Academy of Sciences; Algoma University; Changsha University of Science & Technology		2021	10.3390/rs13040566
Li, J; Xu, L; Zhou, YH; Yin, G; Wu, Y; Yuan, GL; Du, XY	Short-chain chlorinated paraffins in soils indicate landfills as local sources in the Tibetan Plateau	CHEMOSPHERE	Article	China University of Geosciences; China University of Geosciences; Tongji University; Indiana University System; Indiana University Bloomington	0045-6535	2021	10.1016/j.chemosphere.2020.128341
Yao, Y; Liu, YX; Zhou, S; Song, JX; Fu, BJ	Soil moisture determines the recovery time of ecosystems from drought	GLOBAL CHANGE BIOLOGY	Article	Beijing Normal University; Chinese Academy of Sciences; Research Center for Eco-Environmental Sciences (RCEES)	1354-1013	2023	10.1111/gcb.16620
Sun, MZ; Qu, JH; Han, TY; Xue, JQ; Li, KG; Jiang, Z; Zhang, GS; Yu, H; Zhang, Y	Resource utilization of bovine bone to prepare biochar as persulfate activator for phenol degradation	JOURNAL OF CLEANER PRODUCTION	Article	Northeast Agricultural University - China; Chinese Academy of Sciences; Northeast Institute of Geography & Agroecology, CAS; Harbin Institute of Technology; Qingdao Agricultural University	0959-6526	2023	10.1016/j.jclepro.2022.135415
Liang, JJ; Gamarra, JGP; Picard, N; Zhou, M; Pijanowski, B; Jacobs, DF; Reich, PB; Crowther, TW; Nabuurs, GJ; De-Miguel, S; Fang, JY; Woodall, CW; Svenning, JC; Jucker, T; Bastin, JF; Wiser, SK; Slik, F; Hérault, B; Alberti, G; Keppel, G; Hengeveld, GM; Ibisch, PL; Silva, CA; Ter Steege, H; Peri, PL; Coomes, DA; Searle, EB; Von Gadow, K; Jaroszewicz, B; Abbasi, AO; Abegg, M; Yao, YCA; Aguirre-Gut…	Co-limitation towards lower latitudes shapes global forest diversity gradients	NATURE ECOLOGY & EVOLUTION	Article	Purdue University System; Purdue University West Lafayette Campus; Purdue University; Food & Agriculture Organization of the United Nations (FAO); Purdue University System; Purdue University West Lafayette Campus; Purdue University; University of Michigan System; University of Michigan; University of Minnesota System; University of Minnesota Twin Cities; Western Sydney University; Swiss Federal I…	2397-334X	2022	10.1038/s41559-022-01831-x
Bai, ZJ; Xie, MD; Hu, BF; Luo, DF; Wan, C; Peng, J; Shi, Z	Estimation of Soil Organic Carbon Using Vis-NIR Spectral Data and Spectral Feature Bands Selection in Southern Xinjiang, China	SENSORS	Article	Tarim University; Gansu Agricultural University; Jiangxi University of Finance & Economics; Tarim University; Zhejiang University		2022	10.3390/s22166124
Yu, YL; Cheng, HY; Wang, S; Wei, M; Wang, CY; Du, DL	Drought may be beneficial to the competitive advantage of Amaranthus spinosus	JOURNAL OF PLANT ECOLOGY	Article	Jiangsu University; Suzhou University of Science & Technology; Northeast Forestry University - China	1752-9921	2022	10.1093/jpe/rtac001
Ouyang, M; Tian, D; Pan, JM; Chen, GP; Su, HJ; Yan, ZB; Yang, QP; Ji, CJ; Tang, ZY; Fang, JY	Moso bamboo (Phyllostachys edulis) invasion increases forest soil pH in subtropical China	CATENA	Article	Peking University; Peking University; Beijing Forestry University; Jiangxi Agricultural University; Beijing Forestry University	0341-8162	2022	10.1016/j.catena.2022.106339
Jiang, C; Sun, XR; Feng, J; Zhu, SF; Shui, W	Metagenomic analysis reveals the different characteristics of microbial communities inside and outside the karst tiankeng	BMC MICROBIOLOGY	Article	Peking University; Fuzhou University	1471-2180	2022	10.1186/s12866-022-02513-1
Li, SL; Cui, YX; Xia, ZQ; Zhang, XH; Zhu, MM; Gao, Y; An, SY; Yu, WT; Ma, Q	The mechanism of the dose effect of straw on soil respiration: Evidence from enzymatic stoichiometry and functional genes	SOIL BIOLOGY & BIOCHEMISTRY	Article	Chinese Academy of Sciences; Shenyang Institute of Applied Ecology, CAS; Peking University	0038-0717	2022	10.1016/j.soilbio.2022.108636
Liu, Q; Hu, HJ; Xiong, X; Zhao, E; Wang, KH; Wu, CX	Urban natural wetland as a sink for microplastics: A case from Lalu Wetland in Tibet, China	SCIENCE OF THE TOTAL ENVIRONMENT	Article	Tibet University; Chinese Academy of Sciences; Institute of Hydrobiology, CAS; Chinese Academy of Sciences; University of Chinese Academy of Sciences, CAS	0048-9697	2022	10.1016/j.scitotenv.2022.154399
Li, HH; Zhao, Z; Luo, XS; Fang, GD; Zhang, D; Pang, YT; Huang, WJ; Mehmood, T; Tang, MW	Insight into urban PM2.5 chemical composition and environmentally persistent free radicals attributed human lung epithelial cytotoxicity	ECOTOXICOLOGY AND ENVIRONMENTAL SAFETY	Article	Nanjing University of Information Science & Technology; Chinese Academy of Sciences; Institute of Soil Science, CAS; Hohai University	0147-6513	2022	10.1016/j.ecoenv.2022.113356
Huang, JJ; Zhang, ZS; Tao, J; Zhang, LM; Nie, FL; Fei, LL	Source apportionment of carbonaceous aerosols using hourly data and implications for reducing PM2.5 in the Pearl River Delta region of South China	ENVIRONMENTAL RESEARCH	Article	Jinan University; Environment & Climate Change Canada	0013-9351	2022	10.1016/j.envres.2022.112960
Sreenivas, G; Mahesh, P; Mahalakshmi, DV; Kanchana, AL; Chandra, N; Patra, PK; Raja, P; Sai, MVRS; Sripada, S; Rao, PVN; Dadhwal, VK	Seasonal and annual variations of CO2 and CH4 at Shadnagar, a semi-urban site	SCIENCE OF THE TOTAL ENVIRONMENT	Article	Department of Space (DoS), Government of India; Indian Space Research Organisation (ISRO); National Remote Sensing Centre (NRSC); Jawaharlal Nehru Technological University - Hyderabad; Japan Agency for Marine-Earth Science & Technology (JAMSTEC); Jawaharlal Nehru Technological University - Hyderabad	0048-9697	2022	10.1016/j.scitotenv.2022.153114
Zhao, DM; Wang, JJ; Jiang, XP; Zhen, JN; Miao, J; Wang, JZ; Wu, GF	Reflectance spectroscopy for assessing heavy metal pollution indices in mangrove sediments using XGBoost method and physicochemical properties	CATENA	Article	Shenzhen University; Shenzhen University; Shenzhen University; Shenzhen University; Shenzhen University	0341-8162	2022	10.1016/j.catena.2021.105967
Fu, BJ	Ecological and environmental effects of land-use changes in the Loess Plateau of China	CHINESE SCIENCE BULLETIN-CHINESE	Article	Chinese Academy of Sciences; Research Center for Eco-Environmental Sciences (RCEES); Beijing Normal University	0023-074X	2022	10.1360/TB-2022-0543
Agyei, T; Jurán, S; Edwards-Jonásová, M; Fischer, M; Svik, M; Komínková, K; Ofori-Amanfo, KK; Marek, MV; Grace, J; Urban, O	The Influence of Ozone on Net Ecosystem Production of a Ryegrass-Clover Mixture under Field Conditions	ATMOSPHERE	Article	Czech Academy of Sciences; Global Change Research Centre of the Czech Academy of Sciences; Mendel University in Brno; Masaryk University Brno; Slovak University of Technology Bratislava; University of Edinburgh		2021	10.3390/atmos12121629
Guo, XM; Fang, CL	Integrated Land Use Change Related Carbon Source/Sink Examination in Jiangsu Province	LAND	Article	Chinese Academy of Sciences; Institute of Geographic Sciences & Natural Resources Research, CAS; Chinese Academy of Sciences; University of Chinese Academy of Sciences, CAS		2021	10.3390/land10121310
Morantes, G; González, JC; Rincón, G	Characterisation of particulate matter and identification of emission sources in Greater Caracas, Venezuela	AIR QUALITY ATMOSPHERE AND HEALTH	Article	University of Nottingham; Simon Bolivar University; Escuela Superior Politecnica del Litoral; Escuela Superior Politecnica del Litoral	1873-9318	2021	10.1007/s11869-021-01070-2
Vercruysse, W; Smeets, J; Haeldermans, T; Joos, B; Hardy, A; Samyn, P; Yperman, J; Vanreppelen, K; Carleer, R; Adriaensens, P; Marchal, W; Vandamme, D	Biochar from raw and spent common ivy: Impact of preprocessing and pyrolysis temperature on biochar properties	JOURNAL OF ANALYTICAL AND APPLIED PYROLYSIS	Article	Hasselt University; Hasselt University	0165-2370	2021	10.1016/j.jaap.2021.105294
Crispo, M; Dobson, MC; Blevins, RS; Meredith, W; Lake, JA; Edmondson, JL	Heavy metals and metalloids concentrations across UK urban horticultural soils and the factors influencing their bioavailability to food crops	ENVIRONMENTAL POLLUTION	Article	University of Sheffield; University of Nottingham	0269-7491	2021	10.1016/j.envpol.2021.117960
Zhang, QR; Sun, XC; Zhang, KB; Liao, ZN; Xu, SJ	Trade-Offs and Synergies of Ecosystem Services in the Pearl River Delta Urban Agglomeration	SUSTAINABILITY	Article	South China Normal University; Beijing Forestry University		2021	10.3390/su13169155
Evans, DL; Janes-Bassett, V; Borrelli, P; Chenu, C; Ferreira, CSS; Griffiths, RI; Kalantari, Z; Keesstra, S; Lal, R; Panagos, P; Robinson, DA; Seifollahi-Aghmiuni, S; Smith, P; Steenhuis, TS; Thomas, A; Visser, SM	Sustainable futures over the next decade are rooted in soil science	EUROPEAN JOURNAL OF SOIL SCIENCE	Article	Cranfield University; Lancaster University; University of Pavia; Kangwon National University; INRAE; Stockholm University; Royal Institute of Technology; Wageningen University & Research; University of Newcastle; University System of Ohio; Ohio State University; European Commission Joint Research Centre; EC JRC ISPRA Site; University of Aberdeen; Cornell University	1351-0754	2022	10.1111/ejss.13145
Nguyen, TNT; Park, MK; Son, JM; Choi, SD	Spatial distribution and temporal variation of polycyclic aromatic hydrocarbons in runoff and surface water	SCIENCE OF THE TOTAL ENVIRONMENT	Article	Ulsan National Institute of Science & Technology (UNIST)	0048-9697	2021	10.1016/j.scitotenv.2021.148339
Zhou, Y; Li, R; Guo, B; Yu, N; Liu, Y	Cometabolism accelerated simultaneous ammoxidation and organics mineralization in an oxygen-based membrane biofilm reactor treating greywater under low dissolved oxygen conditions	SCIENCE OF THE TOTAL ENVIRONMENT	Article	Huazhong Agricultural University; University of Alberta; Xi'an Shiyou University; University of Surrey	0048-9697	2021	10.1016/j.scitotenv.2021.147898
Fung, TK; Richards, DR; Leong, RAT; Ghosh, S; Tan, CWJ; Drillet, Z; Leong, KL; Edwards, PJ	Litter decomposition and infiltration capacities in soils of different tropical urban land covers	URBAN ECOSYSTEMS	Article	National University of Singapore; University of New England	1083-8155	2022	10.1007/s11252-021-01126-2
Wang, CH; Zhou, SL; Tang, JH; Li, Y; Li, HX; Du, J; Xu, SD; Zhou, QW; Xu, ZY; Wu, SH	Elemental carbon components and PAHs in soils from different areas of the Yangtze River Delta region, China and their relationship	CATENA	Article	Hangzhou Dianzi University; Nanjing University; Zhejiang University of Finance & Economics; Nanjing Forestry University	0341-8162	2021	10.1016/j.catena.2020.105086
Yuan, JY; Ouyang, ZY; Zheng, H; Su, YR	Ecosystem carbon storage following different approaches to grassland restoration in south-eastern Horqin Sandy Land, northern China	GLOBAL ECOLOGY AND CONSERVATION	Article	Yunnan University; Yunnan University; Chinese Academy of Sciences; Research Center for Eco-Environmental Sciences (RCEES); Chinese Academy of Sciences; Institute of Subtropical Agriculture, CAS		2021	10.1016/j.gecco.2020.e01438
Yin, Z; Ottlé, C; Ciais, P; Zhou, F; Wang, XH; Jan, P; Dumas, P; Peng, SS; Li, L; Zhou, XD; Bo, Y; Xi, Y; Piao, SL	Irrigation, damming, and streamflow fluctuations of the Yellow River	HYDROLOGY AND EARTH SYSTEM SCIENCES	Article	UDICE-French Research Universities; Universite Paris Saclay; CEA; Centre National de la Recherche Scientifique (CNRS); Universite Paris Cite; UDICE-French Research Universities; Sorbonne Universite; Universite Paris Cite; Peking University; CIRAD; University of Tokyo; Hohai University; Princeton University; National Oceanic Atmospheric Admin (NOAA) - USA	1027-5606	2021	10.5194/hess-25-1133-2021
Xiao, L; Wang, WJ; Ren, ZB; Fu, Y; Lv, HL; He, XY	Two-city street-view greenery variations and association with forest attributes and landscape metrics in NE China	LANDSCAPE ECOLOGY	Article	Chinese Academy of Sciences; Northeast Institute of Geography & Agroecology, CAS; Chinese Academy of Sciences; University of Chinese Academy of Sciences, CAS; Northeast Forestry University - China	0921-2973	2021	10.1007/s10980-021-01210-0
Zhao, JF; Shi, L; Duan, WY; Li, H; Yi, P; Tao, WM; Shen, GF; Tao, S; Pan, B; Xing, BS	Emission factors of environmentally persistent free radicals in PM2.5 from rural residential solid fuels combusted in a traditional stove	SCIENCE OF THE TOTAL ENVIRONMENT	Article	Kunming University of Science & Technology; Peking University; University of Massachusetts System; University of Massachusetts Amherst	0048-9697	2021	10.1016/j.scitotenv.2021.145151
Velasco, E; Segovia, E; Choong, AMF; Lim, BKY; Vargas, R	Carbon dioxide dynamics in a residential lawn of a tropical city	JOURNAL OF ENVIRONMENTAL MANAGEMENT	Article	National University of Singapore; National University of Singapore; University of Delaware	0301-4797	2021	10.1016/j.jenvman.2020.111752
Chen, YL; Xu, TL; Fu, W; Hu, YJ; Hu, HW; You, LC; Chen, BD	Soil organic carbon and total nitrogen predict large-scale distribution of soil fungal communities in temperate and alpine shrub ecosystems	EUROPEAN JOURNAL OF SOIL BIOLOGY	Article	China Agricultural University; Chinese Academy of Sciences; Research Center for Eco-Environmental Sciences (RCEES); University of Melbourne; Chinese Academy of Sciences; University of Chinese Academy of Sciences, CAS	1164-5563	2021	10.1016/j.ejsobi.2020.103270
Ding, JN; Zhang, DW; Liu, Y; Zhan, XJ; Lu, YT; Zhou, P; Zhang, D	An Electrochemical Aptasensor for Pb2+ Detection Based on Metal-Organic-Framework-Derived Hybrid Carbon	BIOSENSORS-BASEL	Article	Shanghai Jiao Tong University; Shanghai Jiao Tong University; Ministry of Agriculture & Rural Affairs		2021	10.3390/bios11010001
Kavehei, E; Farahani, BS; Jenkins, GA; Lemckert, C; Adame, MF	Soil nitrogen accumulation, denitrification potential, and carbon source tracing in bioretention basins	WATER RESEARCH	Article	Griffith University; Griffith University; University of Canberra	0043-1354	2021	10.1016/j.watres.2020.116511
Wu, WH; Xu, LY; Zheng, HZ; Zhang, XR	How much carbon storage will the ecological space leave in a rapid urbanization area? Scenario analysis from Beijing-Tianjin-Hebei Urban Agglomeration	RESOURCES CONSERVATION AND RECYCLING	Article	Beijing Normal University	0921-3449	2023	10.1016/j.resconrec.2022.106774
Dong, HT; Yang, G; Zhang, YM; Yang, YY; Wang, DW; Zhou, CB	Recycling, disposal, or biodegradable-alternative of polyethylene plastic film for agricultural mulching? A life cycle analysis of their environmental impacts	JOURNAL OF CLEANER PRODUCTION	Article	Chinese Academy of Sciences; Beijing University of Technology; Chinese Academy of Sciences; University of Chinese Academy of Sciences, CAS; Shanxi University; Chinese Academy of Agricultural Sciences; Agro-Environmental Protection Institute, CAAS; Ministry of Agriculture & Rural Affairs; Chinese Academy of Sciences; University of Chinese Academy of Sciences, CAS; Fuyang Normal University	0959-6526	2022	10.1016/j.jclepro.2022.134950
Zhang, DH; Jing, PQ; Sun, PJ; Ren, HH; Ai, ZM	The non-significant correlation between landscape ecological risk and ecosystem services in Xi?an Metropolitan Area, China	ECOLOGICAL INDICATORS	Article	Xi'an University of Science & Technology; Northwest University Xi'an; Northwest University Xi'an	1470-160X	2022	10.1016/j.ecolind.2022.109118
Gan, DY; Zeng, H; Zhu, B	The rhizosphere effect on soil gross nitrogen mineralization: A meta-analysis	SOIL ECOLOGY LETTERS	Article	Peking University; Peking University; Peking University	2662-2289	2022	10.1007/s42832-021-0098-y
Shi, CH; Qu, CK; Sun, W; Zhou, JZ; Zhang, JW; Cao, Y; Zhang, Y; Guo, JH; Zhang, JQ; Qi, SH	Multimedia distribution of polycyclic aromatic hydrocarbons in the Wang Lake Wetland, China	ENVIRONMENTAL POLLUTION	Article	China University of Geosciences; Hubei Polytechnic University; Chinese Academy of Sciences; Wuhan Botanical Garden, CAS; Northwest University Xi'an	0269-7491	2022	10.1016/j.envpol.2022.119358
Odebiri, O; Mutanga, O; Odindi, J; Naicker, R	Modelling soil organic carbon stock distribution across different land-uses in South Africa: A remote sensing and deep learning approach	ISPRS JOURNAL OF PHOTOGRAMMETRY AND REMOTE SENSING	Article	University of Kwazulu Natal	0924-2716	2022	10.1016/j.isprsjprs.2022.04.026
Zhao, JF; Shen, GF; Shi, L; Li, H; Lang, D; Zhang, L; Pan, B; Tao, S	Real-World Emission Characteristics of Environmentally Persistent Free Radicals in PM2.5 from Residential Solid Fuel Combustion	ENVIRONMENTAL SCIENCE & TECHNOLOGY	Article	Kunming University of Science & Technology; Peking University; Southern University of Science & Technology	0013-936X	2022	10.1021/acs.est.1c08449
Zhou, Y; West, CP; Hettiyadura, APS; Pu, W; Shi, TL; Niu, XY; Wen, H; Cui, JC; Wang, X; Laskin, A	Molecular Characterization of Water-Soluble Brown Carbon Chromophores in Snowpack from Northern Xinjiang, China	ENVIRONMENTAL SCIENCE & TECHNOLOGY	Article	Lanzhou University; Purdue University System; Purdue University; Purdue University West Lafayette Campus; Tianjin University; Purdue University System; Purdue University; Purdue University West Lafayette Campus	0013-936X	2022	10.1021/acs.est.1c07972
Yu, JL; Bing, HJ; Chang, RY; Cui, YX; Shen, GT; Wang, XX; Zhang, SP; Fang, LC	Microbial metabolic limitation response to experimental warming along an altitudinal gradient in alpine grasslands, eastern Tibetan Plateau	CATENA	Article	Chinese Academy of Sciences; Institute of Soil & Water Conservation (ISWC), CAS; Chinese Academy of Sciences; University of Chinese Academy of Sciences, CAS; Chinese Academy of Sciences; Institute of Mountain Hazards & Environment, CAS; Peking University; Helmholtz Association; Helmholtz Center for Environmental Research (UFZ); Chinese Academy of Sciences; Chinese Academy of Sciences; Institute o…	0341-8162	2022	10.1016/j.catena.2022.106243
Takavakoglou, V; Pana, E; Skalkos, D	Constructed Wetlands as Nature-Based Solutions in the Post-COVID Agri-Food Supply Chain: Challenges and Opportunities	SUSTAINABILITY	Article	Aristotle University of Thessaloniki; University of Ioannina		2022	10.3390/su14063145
Wu, GY; Riaz, N; Dong, R	China's agricultural ecological efficiency and spatial spillover effect	ENVIRONMENT DEVELOPMENT AND SUSTAINABILITY	Article	Guizhou University; Ocean University of China; Guizhou University	1387-585X	2023	10.1007/s10668-022-02169-x
Xu, HF; Croot, P; Zhang, CS	Exploration of the spatially varying relationships between lead and aluminium concentrations in the topsoil of northern half of Ireland using Geographically Weighted Pearson Correlation Coefficient	GEODERMA	Article	Ollscoil na Gaillimhe-University of Galway; Foshan University	0016-7061	2022	10.1016/j.geoderma.2021.115640
Zhang, XN; Jiao, ZT; Zhao, CS; Qu, Y; Liu, Q; Zhang, H; Tong, YD; Wang, CX; Li, SJ; Guo, J; Zhu, ZD; Yin, SY; Cui, L	Review of Land Surface Albedo: Variance Characteristics, Climate Effect and Management Strategy	REMOTE SENSING	Article	Beijing Normal University; Beijing Normal University; Beijing Normal University; Northeast Normal University - China; Tianjin Normal University		2022	10.3390/rs14061382
Shen, YW; Zhu, B	Effects of nitrogen and phosphorus enrichment on soil N2O emission from natural ecosystems: A global meta-analysis	ENVIRONMENTAL POLLUTION	Article	Peking University; Peking University	0269-7491	2022	10.1016/j.envpol.2022.118993
Salomon, MJJ; Cavagnaro, TRR	Healthy soils: The backbone of productive, safe and sustainable urban agriculture	JOURNAL OF CLEANER PRODUCTION	Article	University of Adelaide; University of Adelaide	0959-6526	2022	10.1016/j.jclepro.2022.130808
Delbecque, N; Dondeyne, S; Gelaude, F; Mouazen, AM; Vermeir, P; Verdoodt, A	Urban soil properties distinguished by parent material, land use, time since urbanization, and pre-urban geomorphology	GEODERMA	Article	Ghent University; Ghent University; University of Antwerp; Ghent University	0016-7061	2022	10.1016/j.geoderma.2022.115719
Shi, JX; Zhang, BG; Liu, J; Fang, Y; Wang, AJ	Spatiotemporal dynamics in microbial communities mediating biogeochemical cycling of nutrients across the Xiaowan Reservoir in Lancang River	SCIENCE OF THE TOTAL ENVIRONMENT	Article	China University of Geosciences; Huazhong Agricultural University; Wuhan Institute of Technology; Harbin Institute of Technology	0048-9697	2022	10.1016/j.scitotenv.2021.151862
Qiu, CJ; Ciais, P; Zhu, D; Guenet, B; Chang, JF; Chaudhary, N; Kleinen, T; Li, XY; Müller, J; Xi, Y; Zhang, WX; Ballantyne, A; Brewer, SC; Brovkin, V; Charman, DJ; Gustafson, A; Gallego-Sala, AV; Gasser, T; Holden, J; Joos, F; Kwon, MJ; Lauerwald, R; Miller, PA; Peng, SS; Page, S; Smith, B; Stocker, BD; Sannel, ABK; Salmon, E; Schurgers, G; Shurpali, NJ; Wårlind, D; Westermann, S	A strong mitigation scenario maintains climate neutrality of northern peatlands	ONE EARTH	Article	Centre National de la Recherche Scientifique (CNRS); CNRS - National Institute for Earth Sciences & Astronomy (INSU); UDICE-French Research Universities; Universite Paris Saclay; CEA; AgroParisTech; UDICE-French Research Universities; Universite Paris Saclay; INRAE; Peking University; UDICE-French Research Universities; Universite PSL; Ecole Normale Superieure (ENS); Centre National de la Recherc…	2590-3330	2022	10.1016/j.oneear.2021.12.008
Guo, M; Cong, X; Zheng, H; Zhang, MJ; Wang, LJ; Gong, JW; Ma, S	Integrating the ordered weighted averaging method to establish an ecological security pattern for the Jianghuai ecological economic zone in China: Synergistic intraregional development	ECOLOGICAL INDICATORS	Article	Nanjing Agricultural University; Ministry of Agriculture & Rural Affairs; Nanjing Forestry University	1470-160X	2022	10.1016/j.ecolind.2022.108543
Islam, I; Cui, SH; Hoque, MZ; Abdullah, HM; Tonny, KF; Ahmed, M; Ferdush, J; Xu, LL; Ding, SP	Dynamics of Tree outside Forest Land Cover Development and Ecosystem Carbon Storage Change in Eastern Coastal Zone, Bangladesh	LAND	Article	Chinese Academy of Sciences; Institute of Urban Environment, CAS; Chinese Academy of Sciences; University of Chinese Academy of Sciences, CAS; Chinese Academy of Sciences; Institute of Urban Environment, CAS; Bangabandhu Sheikh Mujibur Rahman Agricultural University (BSMRAU); Bangabandhu Sheikh Mujibur Rahman Agricultural University (BSMRAU); Xiamen University; Mississippi State University		2022	10.3390/land11010076
Wei, LF; Zhang, YX; Lu, QK; Yuan, ZR; Li, HB; Huang, QB	Estimating the spatial distribution of soil total arsenic in the suspected contaminated area using UAV-Borne hyperspectral imagery and deep learning	ECOLOGICAL INDICATORS	Article	Hubei University; Hubei University; Anhui Academy of Agricultural Sciences	1470-160X	2021	10.1016/j.ecolind.2021.108384
Yang, Y; Duan, P; Schmidt-Rohr, K; Pignatello, JJ	Physicochemical Changes in Biomass Chars by Thermal Oxidation or Ambient Weathering and Their Impacts on Sorption of a Hydrophobic and a Cationic Compound	ENVIRONMENTAL SCIENCE & TECHNOLOGY	Article	Chinese Academy of Sciences; University of Science & Technology of China, CAS; Connecticut Agricultural Experiment Station; Brandeis University	0013-936X	2021	10.1021/acs.est.1c04748
Liu, RQ; He, YH; Zhou, GY; Shao, JJ; Zhou, LY; Zhou, HM; Li, N; Song, BQ; Liang, C; Yan, ER; Chen, XY; Wang, XH; Wang, MH; Bai, SH; Zhou, XH; Phillips, RP	Mycorrhizal effects on decomposition and soil CO2 flux depend on changes in nitrogen availability during forest succession	JOURNAL OF ECOLOGY	Article	East China Normal University; Northeast Forestry University - China; Chinese Academy of Sciences; Shenyang Institute of Applied Ecology, CAS; Griffith University; Sun Yat Sen University; Indiana University System; Indiana University Bloomington	0022-0477	2021	10.1111/1365-2745.13770
Wang, S; Bao, XL; Feng, K; Deng, Y; Zhou, WJ; Shao, PS; Zheng, TT; Yao, F; Yang, S; Liu, SG; Shi, RJ; Bai, Z; Xie, HT; Yu, JH; Zhang, Y; Zhang, YP; Sha, LQ; Song, QH; Liu, YT; Zhou, JZ; Zhang, YG; Li, H; Wang, QK; Han, XG; Zhu, YG; Liang, C	Warming-driven migration of core microbiota indicates soil property changes at continental scale	SCIENCE BULLETIN	Article	Chinese Academy of Sciences; Research Center for Eco-Environmental Sciences (RCEES); Chinese Academy of Sciences; Shenyang Institute of Applied Ecology, CAS; Chinese Academy of Sciences; Xishuangbanna Tropical Botanical Garden, CAS; University of Oklahoma System; University of Oklahoma - Norman; Chinese Academy of Forestry; Research Institute of Forest Ecology, Environment and Protection, CAF; Ch…	2095-9273	2021	10.1016/j.scib.2021.01.021
Chen, HM; Du, XF; Lai, MQ; Nazhafati, M; Li, C; Qi, WC	Biochar Improves Sustainability of Green Roofs via Regulate of Soil Microbial Communities	AGRICULTURE-BASEL	Article	Nanjing University of Science & Technology; Jiangsu Academy of Agricultural Sciences		2021	10.3390/agriculture11070620
Chen, LZ; Lin, QL; Krauss, KW; Zhang, Y; Cormier, N; Yang, Q	Forest thinning in the seaward fringe speeds up surface elevation increment and carbon accumulation in managed mangrove forests	JOURNAL OF APPLIED ECOLOGY	Article	Xiamen University; United States Department of the Interior; United States Geological Survey; Macquarie University	0021-8901	2021	10.1111/1365-2664.13939
Li, C; Chen, LD; Liu, DF; Wei, JQ; He, JH; Duan, XW	The hidden risk in China's cropland conversion from the perspective of slope	CATENA	Article	Yunnan University; Chinese Academy of Sciences; Research Center for Eco-Environmental Sciences (RCEES); Wuhan University; Wuhan University; Yunnan University; Yunnan University	0341-8162	2021	10.1016/j.catena.2021.105536
Yang, YT; McVicar, TR; Yang, DW; Zhang, YQ; Piao, SL; Peng, SS; Beck, HE	Low and contrasting impacts of vegetation CO2 fertilization on global terrestrial runoff over 1982-2010: accounting for aboveground and belowground vegetation-CO2 effects	HYDROLOGY AND EARTH SYSTEM SCIENCES	Article	Tsinghua University; Commonwealth Scientific & Industrial Research Organisation (CSIRO); Australian National University; Chinese Academy of Sciences; Institute of Geographic Sciences & Natural Resources Research, CAS; Peking University; Princeton University	1027-5606	2021	10.5194/hess-25-3411-2021
Xue, WH; Zhang, J; Ji, DY; Che, YF; Lu, TW; Deng, XQ; Li, XY; Tian, YL; Wei, J	Aerosol-induced direct radiative forcing effects on terrestrial ecosystem carbon fluxes over China	ENVIRONMENTAL RESEARCH	Article	Beijing Normal University; Chinese Academy of Sciences; Chinese Academy of Meteorological Sciences (CAMS); Chinese Academy of Meteorological Sciences (CAMS); Beijing Normal University; Northwest University Xi'an; University of Iowa	0013-9351	2021	10.1016/j.envres.2021.111464
Ward, EB; Doroski, DA; Felson, AJ; Hallett, RA; Oldfield, EE; Kuebbing, SE; Bradford, MA	Positive long-term impacts of restoration on soils in an experimental urban forest	ECOLOGICAL APPLICATIONS	Article	Yale University; University of Melbourne; United States Department of Agriculture (USDA); United States Forest Service; Pennsylvania Commonwealth System of Higher Education (PCSHE); University of Pittsburgh	1051-0761	2021	10.1002/eap.2336
Zhang, X; Chen, QR; Wang, C; Zhang, HP; Zhao, YQ; Zhang, LP; Liu, BY; Wu, ZB; Zhou, QH	Characteristic analysis of phospholipid fatty acids (PLFAs) in typical nutrient polluted lake sediment in Wuhan	INTERNATIONAL JOURNAL OF SEDIMENT RESEARCH	Article	Wuhan University of Technology; Chinese Academy of Sciences; Institute of Hydrobiology, CAS	1001-6279	2021	10.1016/j.ijsrc.2020.09.002
Dong, CC; Shi, Y; Wang, JJ; Zeng, H; Wang, W	Divergent responses of the soil bacteria community to multi-level nitrogen enrichment in temperate grasslands under different degrees of degradation	LAND DEGRADATION & DEVELOPMENT	Article	Peking University; Peking University; Peking University; Chinese Academy of Sciences; Institute of Soil Science, CAS; Chinese Academy of Sciences; University of Chinese Academy of Sciences, CAS; Southern University of Science & Technology; Southern University of Science & Technology	1085-3278	2021	10.1002/ldr.3935
Velasco, E	Impact of Singapore's COVID-19 confinement on atmospheric CO2 fluxes at neighborhood scale	URBAN CLIMATE	Article		2212-0955	2021	10.1016/j.uclim.2021.100822
Rong, GH; Zhang, XJ; Wu, HY; Ge, NN; Yao, YF; Wei, XR	Changes in soil organic carbon and nitrogen mineralization and their temperature sensitivity in response to afforestation across China's Loess Plateau	CATENA	Article	Northwest A&F University - China; Northwest A&F University - China; Northwest University Xi'an	0341-8162	2021	10.1016/j.catena.2021.105226
Lu, CY; Kotze, DJ; Setälä, HM	Evergreen trees stimulate carbon accumulation in urban soils via high root production and slow litter decomposition	SCIENCE OF THE TOTAL ENVIRONMENT	Article	University of Helsinki	0048-9697	2021	10.1016/j.scitotenv.2021.145129
Wang, J; Xiang, ZY; Wang, WM; Chang, WJ; Wang, Y	Impacts of strengthened warming by urban heat island on carbon sequestration of urban ecosystems in a subtropical city of China	URBAN ECOSYSTEMS	Article	Sun Yat Sen University; Peking University; China Meteorological Administration	1083-8155	2021	10.1007/s11252-021-01104-8
Song, SS; Hu, XK; Zhu, JL; Zheng, TL; Zhang, F; Ji, CJ; Zhu, JX	The decomposition rates of leaf litter and fine root and their temperature sensitivities are influenced differently by biotic factors	PLANT AND SOIL	Article	Lanzhou University; Peking University; Tianjin Research Institute for Water Transport Engineering	0032-079X	2021	10.1007/s11104-021-04855-7
Asirifi, I; Werner, S; Heinze, S; Saba, CKS; Lawson, IYD; Marschner, B	Short-Term Effect of Biochar on Microbial Biomass, Respiration and Enzymatic Activities in Wastewater Irrigated Soils in Urban Agroecosystems of the West African Savannah	AGRONOMY-BASEL	Article	Ruhr University Bochum; University for Development Studies; University of Ghana		2021	10.3390/agronomy11020271
Yan, B; Lu, Q; He, J; Qi, Y; Fu, G; Xiao, NW; Li, JS	Composition and interaction frequencies in soil bacterial communities change in association with urban park age in Beijing	PEDOBIOLOGIA	Article	Jiangxi Academy of Sciences; Chinese Research Academy of Environmental Sciences; East China University of Technology	0031-4056	2021	10.1016/j.pedobi.2020.150699
Liang, MW; Smith, NG; Chen, JQ; Wu, YT; Guo, ZW; Gornish, ES; Liang, CZ	Shifts in plant composition mediate grazing effects on carbon cycling in grasslands	JOURNAL OF APPLIED ECOLOGY	Article	Peking University; Inner Mongolia University; University of Arizona; Michigan State University; Texas Tech University System; Texas Tech University	0021-8901	2021	10.1111/1365-2664.13824
Yadav, IC; Devi, NL	Nitrated- and oxygenated-polycyclic aromatic hydrocarbon in urban soil from Nepal: Source assessment, air-soil exchange, and soil-air partitioning	ECOTOXICOLOGY AND ENVIRONMENTAL SAFETY	Article	Chinese Academy of Sciences; Guangzhou Institute of Geochemistry, CAS; Tokyo University of Agriculture & Technology; Central University of South Bihar	0147-6513	2021	10.1016/j.ecoenv.2021.111951
Li, YY; Liu, HY; Zhu, XR; Yue, YY; Xue, JX; Shi, L	How permafrost degradation threatens boreal forest growth on its southern margin?	SCIENCE OF THE TOTAL ENVIRONMENT	Article	Peking University	0048-9697	2021	10.1016/j.scitotenv.2020.143154
Zhang, LQ; Xu, YJ; Li, SY	Source and quality of dissolved organic matter in streams are reflective to land use/land cover, climate seasonality and pCO2	ENVIRONMENTAL RESEARCH	Article	Wuhan Institute of Technology; Chinese Academy of Sciences; Chongqing Institute of Green & Intelligent Technology, CAS; Chinese Academy of Sciences; University of Chinese Academy of Sciences, CAS; Louisiana State University System; Louisiana State University; Louisiana State University System; Louisiana State University; Wuhan Institute of Technology	0013-9351	2023	10.1016/j.envres.2022.114608
Huang, HY; Tian, D; Zhou, LH; Su, HJ; Ma, SH; Feng, YH; Tang, ZY; Zhu, JL; Ji, CJ; Fang, JY	Effects of afforestation on soil microbial diversity and enzyme activity: A meta-analysis	GEODERMA	Article	Peking University; Peking University; Beijing Forestry University; Fujian Normal University; Fujian Normal University; Yunnan University	0016-7061	2022	10.1016/j.geoderma.2022.115961
Tian, SQ; Wu, W; Shen, Z; Wang, J; Liu, XQ; Li, LJ; Li, XC; Liu, XS; Chen, HS	A cross-scale study on the relationship between urban expansion and ecosystem services in China	JOURNAL OF ENVIRONMENTAL MANAGEMENT	Article	Nanjing Agricultural University	0301-4797	2022	10.1016/j.jenvman.2022.115774
Sörengård, M; Bergström, S; McCleaf, P; Wiberg, K; Ahrens, L	Long-distance transport of per- and polyfluoroalkyl substances (PFAS) in a Swedish drinking water aquifer	ENVIRONMENTAL POLLUTION	Article	Swedish University of Agricultural Sciences	0269-7491	2022	10.1016/j.envpol.2022.119981
Jin, BJ; Liu, XP; Le Roux, X; Bi, QF; Li, KJ; Wu, CY; Sun, CL; Zhu, YG; Lin, XY	Biochar addition regulates soil and earthworm gut microbiome and multifunctionality	SOIL BIOLOGY & BIOCHEMISTRY	Article	Zhejiang University; University of Groningen; INRAE; UDICE-French Research Universities; Universite Claude Bernard Lyon 1; Centre National de la Recherche Scientifique (CNRS); VetAgro Sup; Max Planck Society; Zhejiang Academy of Agricultural Sciences; Chinese Academy of Sciences; Institute of Urban Environment, CAS	0038-0717	2022	10.1016/j.soilbio.2022.108810
Trifi, M; Gasmi, A; Carbone, C; Majzlan, J; Nasri, N; Dermech, M; Charef, A; Elfil, H	Machine learning-based prediction of toxic metals concentration in an acid mine drainage environment, northern Tunisia	ENVIRONMENTAL SCIENCE AND POLLUTION RESEARCH	Article	Centre de Recherche et des Technologies des Eaux de Borj Cedria; Centre de Recherche et des Technologies des Eaux de Borj Cedria; Mohammed VI Polytechnic University; University of Genoa; Friedrich Schiller University of Jena; Universite de Carthage; Universite de Tunis; Universite de Tunis-El-Manar; Ecole Nationale d'Ingenieurs de Tunis (ENIT); Universite de Tunis-El-Manar; Faculte des Sciences d…	0944-1344	2022	10.1007/s11356-022-21890-8
Wang, WX; Deng, XZ; Wang, YF; Peng, L; Yu, ZY	Impacts of infrastructure construction on ecosystem services in new-type urbanization area of North China Plain	RESOURCES CONSERVATION AND RECYCLING	Article	Chinese Academy of Sciences; Institute of Geographic Sciences & Natural Resources Research, CAS; Chinese Academy of Sciences; University of Chinese Academy of Sciences, CAS; Chinese Academy of Sciences; University of Nottingham Ningbo China	0921-3449	2022	10.1016/j.resconrec.2022.106376
Wong, YK; Liu, KM; Yeung, C; Leung, KKM; Yu, JZ	Measurement report: Characterization and source apportionment of coarse particulate matter in Hong Kong: insights into the constituents of unidentified mass and source origins in a coastal city in southern China	ATMOSPHERIC CHEMISTRY AND PHYSICS	Article	Hong Kong University of Science & Technology; Hong Kong University of Science & Technology; Hong Kong University of Science & Technology	1680-7316	2022	10.5194/acp-22-5017-2022
Feng, YS; Zhou, SJ; Zhou, AN; Xia, WY; Li, JS; Wang, S; Du, YJ	Reuse of a contaminated soil stabilized by a low-carbon binder as roadway subgrade material and mechanical performance evaluation	ENGINEERING GEOLOGY	Article	Southeast University - China; Royal Melbourne Institute of Technology (RMIT); Chinese Academy of Sciences; Wuhan Institute of Rock & Soil Mechanics, CAS	0013-7952	2022	10.1016/j.enggeo.2022.106656
Mao, QZ; Hu, B; Agathokleous, E; Wang, LN; Koike, T; Ma, M; Rennenberg, H	Biochar application improves karstic lime soil physicochemical properties and enzymes activity and enhances sweet tea seedlings physiological performance	SCIENCE OF THE TOTAL ENVIRONMENT	Article	Southwest University - China; Nanjing University of Information Science & Technology; Hokkaido University	0048-9697	2022	10.1016/j.scitotenv.2022.154815
Mladenov, N; Parsons, D; Kinoshita, AM; Pinongcos, F; Mueller, M; Garcia, D; Lipson, DA; Grijalva, LM; Zink, TA	Groundwater-surface water interactions and flux of organic matter and nutrients in an urban, Mediterranean stream	SCIENCE OF THE TOTAL ENVIRONMENT	Article	California State University System; San Diego State University; California State University System; San Diego State University; California State University System; San Diego State University; Stanford University	0048-9697	2022	10.1016/j.scitotenv.2021.152379
Nugent, A; Allison, SD	A framework for soil microbial ecology in urban ecosystems	ECOSPHERE	Article	University of California System; University of California Irvine; University of California System; University of California Irvine	2150-8925	2022	10.1002/ecs2.3968
Luo, D; Li, YY; Yao, HY; Chapman, SJ	Effects of different carbon sources on methane production and the methanogenic communities in iron rich flooded paddy soil	SCIENCE OF THE TOTAL ENVIRONMENT	Article	Chinese Academy of Sciences; Institute of Urban Environment, CAS; Chinese Academy of Sciences; Institute of Urban Environment, CAS; Chinese Academy of Sciences; University of Chinese Academy of Sciences, CAS; Wuhan Institute of Technology; James Hutton Institute	0048-9697	2022	10.1016/j.scitotenv.2022.153636
Liu, HY; Xiao, WF; Li, Q; Tian, Y; Zhu, JH	Spatio-Temporal Change of Multiple Ecosystem Services and Their Driving Factors: A Case Study in Beijing, China	FORESTS	Article	Chinese Academy of Forestry; Research Institute of Forest Ecology, Environment and Protection, CAF; Nanjing Forestry University		2022	10.3390/f13020260
Cui, MJ; Teng, A; Chu, J; Cao, B	A quantitative, high-throughput urease activity assay for comparison and rapid screening of ureolytic bacteria	ENVIRONMENTAL RESEARCH	Article	Fuzhou University; Nanyang Technological University & National Institute of Education (NIE) Singapore; Nanyang Technological University; Nanyang Technological University & National Institute of Education (NIE) Singapore; Nanyang Technological University	0013-9351	2022	10.1016/j.envres.2022.112738
Yao, YF; Song, JX; Wei, XR	The fate of carbon in check dam sediments	EARTH-SCIENCE REVIEWS	Article	Northwest University Xi'an; Ministry of Water Resources; Chinese Academy of Sciences; Institute of Soil & Water Conservation (ISWC), CAS; Northwest A&F University - China; Chinese Academy of Sciences; Institute of Soil & Water Conservation (ISWC), CAS	0012-8252	2022	10.1016/j.earscirev.2021.103889
Liu, X; Yang, T; Shi, Y; Zhu, YC; He, ML; Zhao, YK; Adams, JM; Chu, HY	Strong partitioning of soil bacterial community composition and co-occurrence networks along a small-scale elevational gradient on Zijin Mountain	SOIL ECOLOGY LETTERS	Article	Chinese Academy of Sciences; Institute of Soil Science, CAS; Chinese Academy of Sciences; University of Chinese Academy of Sciences, CAS; Henan University; Nanjing Normal University; Nanjing University	2662-2289	2021	10.1007/s42832-021-0122-2
Li, P; Yin, RB; Zhou, HM; Yuan, XY; Feng, ZZ	Soil pH drives poplar rhizosphere soil microbial community responses to ozone pollution and nitrogen addition	EUROPEAN JOURNAL OF SOIL SCIENCE	Article	Beijing Forestry University; Chinese Academy of Sciences; Research Center for Eco-Environmental Sciences (RCEES); Nanjing University of Information Science & Technology	1351-0754	2022	10.1111/ejss.13186
Skorbilowicz, M; Skorbilowicz, E; Rogowska, W	Heavy Metal Concentrations in Roadside Soils on the Bialystok-Budzisko Route in Northeastern Poland	MINERALS	Article	Bialystok University of Technology		2021	10.3390/min11111290
Xu, HD; Zhu, BA; Wei, XM; Yu, MK; Cheng, XR	Root functional traits mediate rhizosphere soil carbon stability in a subtropical forest	SOIL BIOLOGY & BIOCHEMISTRY	Article	Chinese Academy of Forestry; Research Institute of Subtropical Forestry, CAF; Peking University; Peking University; Chinese Academy of Sciences; Institute of Subtropical Agriculture, CAS; Chinese Academy of Sciences; Institute of Subtropical Agriculture, CAS	0038-0717	2021	10.1016/j.soilbio.2021.108431
Guo, B; Zhang, B; Su, Y; Zhang, DM; Wang, Y; Bian, Y; Suo, L; Guo, XN; Bai, HR	Retrieving zinc concentrations in topsoil with reflectance spectroscopy at Opencast Coal Mine sites	SCIENTIFIC REPORTS	Article	Xi'an University of Science & Technology	2045-2322	2021	10.1038/s41598-021-99106-1
Altuwayjiri, A; Pirhadi, M; Kalafy, M; Alharbi, B; Sioutas, C	Impact of different sources on the oxidative potential of ambient particulate matter PM10 in Riyadh, Saudi Arabia: A focus on dust emissions	SCIENCE OF THE TOTAL ENVIRONMENT	Article	University of Southern California; Majmaah University; King Abdulaziz City for Science & Technology	0048-9697	2022	10.1016/j.scitotenv.2021.150590
Riaz, R; Malik, RN; de Wit, CA	Soil-air partitioning of semivolatile organic compounds in the Lesser Himalaya region: Influence of soil organic matter, atmospheric transport processes and secondary emissions	ENVIRONMENTAL POLLUTION	Article	Quaid I Azam University; Stockholm University	0269-7491	2021	10.1016/j.envpol.2021.118006
Wu, JJ; Jin, XR; Feng, Z; Chen, TQ; Wang, CX; Feng, DR; Lv, JQ	Relationship of Ecosystem Services in the Beijing-Tianjin-Hebei Region Based on the Production Possibility Frontier	LAND	Article	China University of Geosciences; Peking University; Beijing Normal University; Beijing Normal University		2021	10.3390/land10080881
Huang, XC; Xu, BQ; Zhu, SS; Ma, F; Jin, C	Overlooked contributions of biochar-derived dissolved organic matter on the adsorption of Pb (II): Impacts of fractionation and interfacial force	JOURNAL OF HAZARDOUS MATERIALS	Article	Sun Yat Sen University; Sun Yat Sen University; Harbin Institute of Technology	0304-3894	2021	10.1016/j.jhazmat.2021.126692
Zhao, C; Gao, B; Wang, L; Huang, W; Xu, S; Cui, SH	Spatial patterns of net greenhouse gas balance and intensity in Chinese orchard system	SCIENCE OF THE TOTAL ENVIRONMENT	Article	Chinese Academy of Sciences; Institute of Urban Environment, CAS; Chinese Academy of Sciences; University of Chinese Academy of Sciences, CAS	0048-9697	2021	10.1016/j.scitotenv.2021.146250
Kim, MS; Kim, JY; Park, J; Yeon, SH; Shin, S; Choi, J	Assessment of Pollution Sources and Contribution in Urban Dust Using Metal Concentrations and Multi-Isotope Ratios (13C, 207/206Pb) in a Complex Industrial Port Area, Korea	ATMOSPHERE	Article			2021	10.3390/atmos12070840
Borges, ER; Dexter, KG; Pyles, MV; Bueno, ML; dos Santos, RM; Fontes, MAL; Carvalho, FA	The interaction of land-use history and tree species diversity in driving variation in the aboveground biomass of urban versus non-urban tropical forests	ECOLOGICAL INDICATORS	Article	Universidade Federal de Juiz de Fora; University of Edinburgh; Universidade Federal de Lavras; Universidade Federal de Lavras	1470-160X	2021	10.1016/j.ecolind.2021.107915
Jiang, C; Feng, J; Zhu, SF; Shui, W	Characteristics of the Soil Microbial Communities in Different Slope Positions along an Inverted Stone Slope in a Degraded Karst Tiankeng	BIOLOGY-BASEL	Article	Peking University; Fuzhou University		2021	10.3390/biology10060474
Wei, SY; Chen, QJ; Wu, WB; Ma, J	Quantifying the indirect effects of urbanization on urban vegetation carbon uptake in the megacity of Shanghai, China	ENVIRONMENTAL RESEARCH LETTERS	Article	Xi'an University of Science & Technology; Fudan University	1748-9326	2021	10.1088/1748-9326/ac06fd
Zhang, Y; Ge, TG; Liu, J; Sun, YL; Liu, Y; Zhao, Q; Tian, TF	The comprehensive measurement method of energy conservation and emission reduction in the whole process of urban sewage treatment based on carbon emission	ENVIRONMENTAL SCIENCE AND POLLUTION RESEARCH	Article		0944-1344	2021	10.1007/s11356-021-14472-7
Lee, HS; Hur, J; Shin, HS	Dynamic exchange between particulate and dissolved matter following sequential resuspension of particles from an urban watershed under photo-irradiation*	ENVIRONMENTAL POLLUTION	Article	Seoul National University of Science & Technology; Sejong University	0269-7491	2021	10.1016/j.envpol.2021.117395
Huyen, TT; Yamaguchi, R; Kurotsuchi, Y; Sekiguchi, K; Dung, NT; Thuy, NTT; Thuy, LB	Characteristics of Chemical Components in Fine Particles (PM2.5) and Ultrafine Particles (PM0.1) in Hanoi, Vietnam: a Case Study in Two Seasons with Different Humidity	WATER AIR AND SOIL POLLUTION	Article	Saitama University; Hanoi University of Science & Technology (HUST); Vietnam National University Hochiminh City	0049-6979	2021	10.1007/s11270-021-05108-0
Sodango, TH; Sha, JM; Li, XM; Noszczyk, T; Shang, JL; Aneseyee, AB; Bao, ZC	Modeling the Spatial Dynamics of Soil Organic Carbon Using Remotely-Sensed Predictors in Fuzhou City, China	REMOTE SENSING	Article	Fujian Normal University; Fujian Normal University; Fujian Normal University; Agricultural University Krakow; Agriculture & Agri Food Canada		2021	10.3390/rs13091682
Wang, RB; Xu, XJ; Bai, Y; Alatalo, JM; Yang, ZB; Yang, W; Yang, ZQ	Impacts of Urban Land Use Changes on Ecosystem Services in Dianchi Lake Basin, China	SUSTAINABILITY	Article	Kunming University of Science & Technology; Chinese Academy of Sciences; Xishuangbanna Tropical Botanical Garden, CAS; Qatar University; Qatar University; Chinese Academy of Sciences; University of Chinese Academy of Sciences, CAS; University System of Maryland; University of Maryland College Park		2021	10.3390/su13094813
Yu, H; Deng, Y; He, ZL; Pendall, E; Carrillo, Y; Wang, S; Jin, DC; Wu, LY; Wang, AJ; Xu, Y; Liu, BY; Tai, X; Zhou, JZ	Stimulation of soil microbial functioning by elevated CO2 may surpass effects mediated by irrigation in a semiarid grassland	GEODERMA	Article	Chinese Academy of Sciences; Research Center for Eco-Environmental Sciences (RCEES); Liaoning Technical University; Chinese Academy of Sciences; University of Chinese Academy of Sciences, CAS; Shandong University; Sun Yat Sen University; Western Sydney University; University of Wyoming; University of Oklahoma System; University of Oklahoma - Norman; Harbin Institute of Technology; Tsinghua Univer…	0016-7061	2021	10.1016/j.geoderma.2021.115162
Guillen-Cruz, G; Rodríguez-Sánchez, AL; Fernández-Luqueño, F; Flores-Rentería, D	Influence of vegetation type on the ecosystem services provided by urban green areas in an arid zone of northern Mexico	URBAN FORESTRY & URBAN GREENING	Article	Instituto Politecnico Nacional - Mexico	1618-8667	2021	10.1016/j.ufug.2021.127135
Zhang, YY; Liu, XJ; Zhang, L; Tang, AH; Goulding, K; Collett, JL	Evolution of secondary inorganic aerosols amidst improving PM2.5 air quality in the North China plain	ENVIRONMENTAL POLLUTION	Article	China Agricultural University; Peking University; UK Research & Innovation (UKRI); Biotechnology and Biological Sciences Research Council (BBSRC); Rothamsted Research; Colorado State University	0269-7491	2021	10.1016/j.envpol.2021.117027
Ran, LS; Shi, HY; Yang, XK	Magnitude and drivers of CO2 and CH4 emissions from an arid/semiarid river catchment on the Chinese Loess Plateau	JOURNAL OF HYDROLOGY	Article	University of Hong Kong; Inner Mongolia University; Guangzhou University	0022-1694	2021	10.1016/j.jhydrol.2021.126260
Li, PJ; Liu, CF; Liu, LC; Wang, WT	Dynamic Analysis of Supply and Demand Coupling of Ecosystem Services in Loess Hilly Region: A Case Study of Lanzhou, China	CHINESE GEOGRAPHICAL SCIENCE	Article	Northwest Normal University - China; Northwest Normal University - China	1002-0063	2021	10.1007/s11769-021-1190-z
Yu, QS; Hanif, A; Rao, XQ; He, JH; Sun, D; Liu, SP; He, D; Shen, WJ	Long-term restoration altered edaphic properties and soil microbial communities in forests: evidence from four plantations of southern China	RESTORATION ECOLOGY	Article	Peking University; Chinese Academy of Sciences; Guangxi University	1061-2971	2021	10.1111/rec.13354
Wu, F; Jiao, S; Hu, J; Wu, XY; Wang, B; Shen, GF; Yang, Y; Tao, S; Wang, XL	Stronger impacts of long-term relative to short-term exposure to carbon nanomaterials on soil bacterial communities	JOURNAL OF HAZARDOUS MATERIALS	Article	Peking University; Peking University; Nevada System of Higher Education (NSHE); University of Nevada Reno	0304-3894	2021	10.1016/j.jhazmat.2020.124550
Zhang, LX; Guan, YT; Jiang, SC	Investigations of soil autotrophic ammonia oxidizers in farmlands through genetics and big data analysis	SCIENCE OF THE TOTAL ENVIRONMENT	Article	University of California System; University of California Irvine; Tsinghua University	0048-9697	2021	10.1016/j.scitotenv.2021.146091
Pereira, MC; O'Riordan, R; Stevens, C	Urban soil microbial community and microbial-related carbon storage are severely limited by sealing	JOURNAL OF SOILS AND SEDIMENTS	Article	Universidade Federal de Vicosa; Lancaster University	1439-0108	2021	10.1007/s11368-021-02881-7
Zhang, JH; Li, H; Zhang, HF; Zhang, H; Tang, ZY	Responses of Litter Decomposition and Nutrient Dynamics to Nitrogen Addition in Temperate Shrublands of North China	FRONTIERS IN PLANT SCIENCE	Article	Xinzhou Teachers University; Jiangsu Normal University; Shanxi University; Peking University; Peking University	1664-462X	2021	10.3389/fpls.2020.618675
Kavehei, E; Iram, N; Rashti, MR; Jenkins, GA; Lemckert, C; Adame, MF	Greenhouse gas emissions from stormwater bioretention basins	ECOLOGICAL ENGINEERING	Article	Griffith University; Griffith University; University of Canberra	0925-8574	2021	10.1016/j.ecoleng.2020.106120
Vicente-Vicente, JL; Piorr, A	Can a shift to regional and organic diets reduce greenhouse gas emissions from the food system? A case study from Qatar	CARBON BALANCE AND MANAGEMENT	Article	Leibniz Zentrum fur Agrarlandschaftsforschung (ZALF)	1750-0680	2021	10.1186/s13021-020-00167-y
Nie, SQ; Mo, SM; Gao, TW; Yan, B; Shen, PH; Kashif, M; Zhang, ZF; Li, JH; Jiang, CJ	Coupling effects of nitrate reduction and sulfur oxidation in a subtropical marine mangrove ecosystem with Spartina alterniflora invasion	SCIENCE OF THE TOTAL ENVIRONMENT	Article	Guangxi University; Guangxi Academy of Sciences; Guangxi Academy of Sciences; Chinese Academy of Sciences; Research Center for Eco-Environmental Sciences (RCEES); Chinese Academy of Sciences; University of Chinese Academy of Sciences, CAS	0048-9697	2023	10.1016/j.scitotenv.2022.160930
Xiao, Y; Xue, J; Zhang, XL; Wang, N; Hong, YS; Jiang, YF; Zhou, Y; Teng, HF; Hu, BF; Lugato, E; Richer-de-Forges, AC; Arrouays, D; Shi, Z; Chen, SC	Improving pedotransfer functions for predicting soil mineral associated organic carbon by ensemble machine learning	GEODERMA	Article	Zhejiang University; Zhejiang University of Finance & Economics; Wuhan Institute of Technology; Jiangxi University of Finance & Economics; European Commission Joint Research Centre; EC JRC ISPRA Site; INRAE	0016-7061	2022	10.1016/j.geoderma.2022.116208
Ma, XM; Zhou, Z; Chen, J; Xu, H; Ma, SH; Dippold, MA; Kuzyakov, Y	Long-term nitrogen and phosphorus fertilization reveals that phosphorus limitation shapes the microbial community composition and functions in tropical montane forest soil	SCIENCE OF THE TOTAL ENVIRONMENT	Article	Zhejiang A&F University; Chinese Academy of Forestry; Research Institute of Tropical Forestry, CAF; Peking University; Eberhard Karls University of Tubingen; University of Gottingen; Peoples Friendship University of Russia	0048-9697	2023	10.1016/j.scitotenv.2022.158709
Li, DH; Yang, YX; Xia, F; Sun, W; Li, X; Xie, YJ	Exploring the influences of different processes of habitat fragmentation on ecosystem services	LANDSCAPE AND URBAN PLANNING	Article	Fudan University; Fudan University	0169-2046	2022	10.1016/j.landurbplan.2022.104544
Xing, AJ; Du, EZ; Shen, HH; Xu, LC; Zhao, MY; Liu, XY; Fang, JY	High-level nitrogen additions accelerate soil respiration reduction over time in a boreal forest	ECOLOGY LETTERS	Article	Chinese Academy of Sciences; Institute of Botany, CAS; Chinese Academy of Sciences; University of Chinese Academy of Sciences, CAS; Beijing Normal University; Peking University; Peking University	1461-023X	2022	10.1111/ele.14065
Holzinger, A; Mair, MM; Luecker, D; Seidenath, D; Opel, T; Langhof, N; Otti, O; Feldhaar, H	Comparison of fitness effects in the earthworm Eisenia fetida after exposure to single or multiple anthropogenic pollutants	SCIENCE OF THE TOTAL ENVIRONMENT	Article	University of Bayreuth; University of Bayreuth; University of Bayreuth	0048-9697	2022	10.1016/j.scitotenv.2022.156387
Noe, GB; Hopkins, KG; Claggett, PR; Schenk, ER; Metes, MJ; Ahmed, L; Doody, TR; Hupp, CR	Streambank and floodplain geomorphic change and contribution to watershed material budgets	ENVIRONMENTAL RESEARCH LETTERS	Article	United States Department of the Interior; United States Geological Survey; United States Department of the Interior; United States Geological Survey; United States Department of the Interior; United States Geological Survey; United States Department of the Interior; United States Geological Survey	1748-9326	2022	10.1088/1748-9326/ac6e47
Gao, GF; Li, H; Shi, Y; Yang, T; Gao, CH; Fan, KK; Zhang, YH; Zhu, YG; Delgado-Baquerizo, M; Zheng, HL; Chu, HY	Continental-scale plant invasions reshuffle the soil microbiome of blue carbon ecosystems	GLOBAL CHANGE BIOLOGY	Article	Chinese Academy of Sciences; Institute of Soil Science, CAS; Chinese Academy of Sciences; University of Chinese Academy of Sciences, CAS; Xiamen University; Bengbu University; Henan University; Chinese Academy of Sciences; Institute of Urban Environment, CAS; Consejo Superior de Investigaciones Cientificas (CSIC); CSIC - Instituto de Recursos Naturales y Agrobiologia de Sevilla (IRNAS); Universid…	1354-1013	2022	10.1111/gcb.16211
Geng, HH; Wang, F; Yan, CC; Ma, S; Zhang, YY; Qin, QZ; Tian, ZJ; Liu, RP; Chen, HL; Zhou, BH; Yuan, RF	Rhizosphere microbial community composition and survival strategies in oligotrophic and metal(loid) contaminated iron tailings areas	JOURNAL OF HAZARDOUS MATERIALS	Article	University of Science & Technology Beijing; Beijing Normal University; Chinese Academy of Sciences; Institute of Urban Environment, CAS; China University of Mining & Technology	0304-3894	2022	10.1016/j.jhazmat.2022.129045
Xue, BL; Yinglan, A; Wang, GQ; Helman, D; Sun, G; Tao, SL; Liu, TX; Yan, DH; Zhao, TT; Zhang, HB; Chen, LH; Sun, WC; Xiao, JF	Divergent Hydrological Responses to Forest Expansion in Dry and Wet Basins of China: Implications for Future Afforestation Planning	WATER RESOURCES RESEARCH	Article	Beijing Normal University; China Institute of Water Resources & Hydropower Research; Hebrew University of Jerusalem; Hebrew University of Jerusalem; United States Department of Agriculture (USDA); United States Forest Service; Peking University; Inner Mongolia Agricultural University; Sun Yat Sen University; Southern Marine Science & Engineering Guangdong Laboratory; Southern Marine Science & Eng…	0043-1397	2022	10.1029/2021WR031856
Cetin, Z; Yastikli, N	The Use of Machine Learning Algorithms in Urban Tree Species Classification	ISPRS INTERNATIONAL JOURNAL OF GEO-INFORMATION	Article	Yildiz Technical University		2022	10.3390/ijgi11040226
Chai, GD; Wang, DQ; Shan, JQ; Jiang, CB; Yang, ZJ; Liu, EY; Meng, HY; Wang, H; Wang, Z; Qin, L; Xi, JY; Ma, YN; Li, HE; Qian, YS; Li, JK; Lin, YS	Accumulation of high-molecular-weight polycyclic aromatic hydrocarbon impacted the performance and microbial ecology of bioretention systems	CHEMOSPHERE	Article	Xi'an University of Technology; Xi'an University of Technology; Xi'an University of Technology; Xi'an Modern Chemistry Research Institute; Nanjing University	0045-6535	2022	10.1016/j.chemosphere.2022.134314
You, YM; Chu, SH; Khalid, M; Hayat, K; Yang, XJ; Zhang, D; Zhou, P	A sustainable approach for removing nitrate: Studying the nitrate transformation and metabolic potential under different carbon source by microorganism	JOURNAL OF CLEANER PRODUCTION	Article	Shanghai Jiao Tong University; Ministry of Agriculture & Rural Affairs; Shanghai Jiao Tong University	0959-6526	2022	10.1016/j.jclepro.2022.131169
Deng, J; Wu, F; Gao, SX; Dionysiou, DD; Huang, LZ	Self-activated Ni(OH)2 cathode for complete electrochemical reduction of trichloroethylene to ethane in low-conductivity groundwater	APPLIED CATALYSIS B-ENVIRONMENTAL	Article	Wuhan University; Wuhan University; Wuhan University; Chinese Academy of Sciences; University of Science & Technology of China, CAS; University System of Ohio; University of Cincinnati	0926-3373	2022	10.1016/j.apcatb.2022.121258
Zhou, S; Wang, JY; Chen, L; Wang, J; Zhao, FZ	Microbial community structure and functional genes drive soil priming effect following afforestation	SCIENCE OF THE TOTAL ENVIRONMENT	Article	Northwest University Xi'an; Northwest University Xi'an; Ministry of Water Resources; Chinese Academy of Sciences; Institute of Soil & Water Conservation (ISWC), CAS	0048-9697	2022	10.1016/j.scitotenv.2022.153925
Luo, YY; Yang, DW; O'Connor, P; Wu, TH; Ma, WJ; Xu, LX; Guo, RF; Lin, JY	Dynamic characteristics and synergistic effects of ecosystem services under climate change scenarios on the Qinghai-Tibet Plateau	SCIENTIFIC REPORTS	Article	Chinese Academy of Sciences; Institute of Urban Environment, CAS; Chinese Academy of Sciences; University of Chinese Academy of Sciences, CAS; Southwest University - China; University of Adelaide; University of Adelaide; Chinese Academy of Sciences; Lanzhou University; Leiden University; Leiden University - Excl LUMC	2045-2322	2022	10.1038/s41598-022-06350-0
Datta, D; Chandra, S; Nath, CP; Kar, G; Ghosh, S; Chaturvedi, S; Bhatnagar, A; Singh, G; Singh, V	Soil-plant water dynamics, yield, quality and profitability of spring sweet corn under variable irrigation scheduling, crop establishment and moisture conservation practices	FIELD CROPS RESEARCH	Article	Indian Council of Agricultural Research (ICAR); ICAR - Central Research Institute for Jute & Allied Fibres; Govind Ballabh Pant University of Agriculture Technology; Indian Council of Agricultural Research (ICAR); ICAR - Indian Institute of Pulses Research; Indian Council of Agricultural Research (ICAR); ICAR - Directorate on Onion & Garlic Research	0378-4290	2022	10.1016/j.fcr.2022.108450
Li, JY; Zhou, Y; Li, Q; Yi, SQ; Peng, LA	Exploring the Effects of Land Use Changes on the Landscape Pattern and Soil Erosion of Western Hubei Province from 2000 to 2020	INTERNATIONAL JOURNAL OF ENVIRONMENTAL RESEARCH AND PUBLIC HEALTH	Article	Central China Normal University; Central China Normal University		2022	10.3390/ijerph19031571
Li, HY; Mao, DH; Li, XY; Wang, ZM; Jia, MM; Huang, X; Xiao, YH; Xiang, HX	Understanding the contrasting effects of policy-driven ecosystem conservation projects in northeastern China	ECOLOGICAL INDICATORS	Article	Qingdao University of Technology; Chinese Academy of Sciences; Northeast Institute of Geography & Agroecology, CAS; Jilin University; University of Arkansas System; University of Arkansas Fayetteville	1470-160X	2022	10.1016/j.ecolind.2022.108578
Cummings, LE; Stewart, JD; Kremer, P; Shakya, KM	Predicting citywide distribution of air pollution using mobile monitoring and three-dimensional urban structure	SUSTAINABLE CITIES AND SOCIETY	Article	Villanova University; Vrije Universiteit Amsterdam	2210-6707	2022	10.1016/j.scs.2021.103510
Wang, XM; Wen, YY; Liu, XC; Wen, D; Long, YX; Zhao, P; Liu, PA; Zhong, J	Protection Effect and Vacancy of the Ecological Protection Redline: A Case Study in Guangdong-Hong Kong-Macao Greater Bay Area, China	REMOTE SENSING	Article	University of California System; University of California Davis		2021	10.3390/rs13245171
Pregitzer, CC; Hanna, C; Charlop-Powers, S; Bradford, MA	Estimating carbon storage in urban forests of New York City	URBAN ECOSYSTEMS	Article		1083-8155	2022	10.1007/s11252-021-01173-9
Gan, L; Garg, A; Wang, H; Mei, GX; Liu, JQ	Influence of biochar amendment on stormwater management in green roofs: experiment with numerical investigation	ACTA GEOPHYSICA	Article	Guangxi University; Guangxi University; Shantou University	1895-6572	2021	10.1007/s11600-021-00685-4
Zhang, TP; Sun, FJ; Lei, QL; Jiang, ZD; Luo, JF; Lindsey, S; Xu, YB; Liu, HB	Quantification of soil element changes in long-term agriculture: A case study in Northeast China	CATENA	Article	Chinese Academy of Agricultural Sciences; Institute of Agricultural Resources & Regional Planning, CAAS; Ministry of Agriculture & Rural Affairs; Shenyang Agricultural University; AgResearch - New Zealand	0341-8162	2022	10.1016/j.catena.2021.105766
Samek, L; Styszko, K; Stegowski, Z; Zimnoch, M; Skiba, A; Turek-Fijak, A; Gorczyca, Z; Furman, P; Kasper-Giebl, A; Rozanski, K	Comparison of PM10 Sources at Traffic and Urban Background Sites Based on Elemental, Chemical and Isotopic Composition: Case Study from Krakow, Southern Poland	ATMOSPHERE	Article	AGH University of Krakow; AGH University of Krakow; Technische Universitat Wien		2021	10.3390/atmos12101364
Thapa, P; Torralba, M; Buerkert, A; Dittrich, C; Plieninger, T	Ecological and social outcomes of urbanization on regional farming systems: a global synthesis	ECOLOGY AND SOCIETY	Article	Universitat Kassel; Universitat Kassel; University of Gottingen; University of Gottingen	1708-3087	2021	10.5751/ES-12579-260324
Constantin, M; Strat, G; Deaconu, ME; Patarlageanu, SR	INNOVATIVE AGRI-FOOD VALUE CHAIN MANAGEMENT THROUGH A UNIQUE URBAN ECOSYSTEM	MANAGEMENT RESEARCH AND PRACTICE	Article	Bucharest University of Economic Studies; University of Agronomic Science & Veterinary Medicine - Bucharest	2067-2462	2021
Buzzard, V; Gil-Loaiza, J; Grachet, NG; Talkington, H; Youngerman, C; Tfaily, MM; Meredith, LK	Green infrastructure influences soil health: Biological divergence one year after installation	SCIENCE OF THE TOTAL ENVIRONMENT	Article	University of Arizona; University of Arizona; University of Arizona	0048-9697	2021	10.1016/j.scitotenv.2021.149644
Napoletano, P; Colombo, C; Di Iorio, E; Memoli, V; Panico, SC; Ruggiero, AG; Santorufo, L; Maisto, G; De Marco, A	Integrated Approach for Quality Assessment of Technosols in Experimental Mesocosms	SUSTAINABILITY	Article	University of Molise; University of Naples Federico II; University of Naples Federico II		2021	10.3390/su13169101
Sharma, SK; Banoo, R; Mandal, TK	Seasonal characteristics and sources of carbonaceous components and elements of PM10 (2010-2019) in Delhi, India	JOURNAL OF ATMOSPHERIC CHEMISTRY	Article	Council of Scientific & Industrial Research (CSIR) - India; CSIR - National Physical Laboratory (NPL); Academy of Scientific & Innovative Research (AcSIR)	0167-7764	2021	10.1007/s10874-021-09424-x
He, YH; Yao, YX; Jia, Z; Chen, XY; Zhou, LY; Shao, JJ; Liu, RQ; Zhou, GY; Fu, YL; Sun, XY; Zhou, XH; Bai, SH	Antagonistic interaction between biochar and nitrogen addition on soil greenhouse gas fluxes: A global synthesis	GLOBAL CHANGE BIOLOGY BIOENERGY	Article	East China Normal University; Northeast Forestry University - China; Griffith University	1757-1693	2021	10.1111/gcbb.12878
Wang, QQ; Huang, Q; Wang, JX; Khan, MA; Guo, GM; Liu, Y; Hu, S; Jin, FM; Wang, JF; Yu, YB	Dissolved organic carbon drives nutrient cycling via microbial community in paddy soil	CHEMOSPHERE	Article	Hainan University; Hainan University; Shenzhen University; Chinese Academy of Sciences; Institute of Urban Environment, CAS; Chinese Academy of Sciences	0045-6535	2021	10.1016/j.chemosphere.2021.131472
Nizamutdinov, T; Morgun, E; Pechkin, A; Kostecki, J; Greinert, A; Abakumov, E	Differentiation of Trace Metal Contamination Level between Different Urban Functional Zones in Permafrost Affected Soils (the Example of Several Cities in the Yamal Region, Russian Arctic)	MINERALS	Article	Saint Petersburg State University; University of Zielona Gora		2021	10.3390/min11070668
Tatariw, C; Mason, OU; Mortazavi, B	Ditching Nutrients: Roadside Drainage Networks are Hotspots for Microbial Nitrogen Removal	JOURNAL OF GEOPHYSICAL RESEARCH-BIOGEOSCIENCES	Article	University of Alabama System; University of Alabama Tuscaloosa; State University System of Florida; Florida State University; University of Alabama System; University of Alabama Tuscaloosa; University of Alabama System; University of Alabama Tuscaloosa	2169-8953	2021	10.1029/2020JG006115
Guo, XJ; Wu, Y; Li, NX; Tian, YY; Peng, YY; Yuan, DH	Effects on the complexation of heavy metals onto biochar-derived WEOM extracted from low-temperature pyrolysis	ECOTOXICOLOGY AND ENVIRONMENTAL SAFETY	Article	Chengdu University of Information Technology; Beijing University of Civil Engineering & Architecture	0147-6513	2021	10.1016/j.ecoenv.2021.112456
Liu, FQ; You, SJ; Wang, ZY; Liu, YB	Redox-Active Nanohybrid Filter for Selective Recovery of Gold from Water	ACS ES&T ENGINEERING	Article	Donghua University; Southern University of Science & Technology; Harbin Institute of Technology		2021	10.1021/acsestengg.1c00158
Rahman, YASRA; Cooper, RACE; Truong, NOL; Ergas, SRN; Nachabe, MMO	Water quality and hydraulic performance of biochar amended biofilters for management of agricultural runoff	CHEMOSPHERE	Article	State University System of Florida; University of South Florida; State University System of Florida; University of South Florida	0045-6535	2021	10.1016/j.chemosphere.2021.130978
Zhou, HM; Shao, JJ; Liu, HY; Du, ZG; Zhou, LY; Liu, RQ; Bernhofer, C; Grünwald, T; Dusek, J; Montagnani, L; Tagesson, T; Black, TA; Jassal, R; Woodgate, W; Biraud, S; Varlagin, A; Mammarella, I; Gharun, M; Shekhar, A; Buchmann, N; Manco, A; Magliulo, E; Billesbach, D; Silberstein, RP; Ohta, T; Yu, GR; Chen, Z; Zhang, YP; Zhou, XH	Relative importance of climatic variables, soil properties and plant traits to spatial variability in net CO2 exchange across global forests and grasslands	AGRICULTURAL AND FOREST METEOROLOGY	Article	East China Normal University; Technische Universitat Dresden; Czech Academy of Sciences; Global Change Research Centre of the Czech Academy of Sciences; Free University of Bozen-Bolzano; Lund University; University of Copenhagen; University of British Columbia; University of Queensland; Commonwealth Scientific & Industrial Research Organisation (CSIRO); United States Department of Energy (DOE); L…	0168-1923	2021	10.1016/j.agrformet.2021.108506
Chen, SC; Budhraja, R; Adrian, L; Calabrese, F; Stryhanyuk, H; Musat, N; Richnow, HH; Duan, GL; Zhu, YG; Musat, F	Novel clades of soil biphenyl degraders revealed by integrating isotope probing, multi-omics, and single-cell analyses	ISME JOURNAL	Article	Helmholtz Association; Helmholtz Center for Environmental Research (UFZ); Helmholtz Association; Helmholtz Center for Environmental Research (UFZ); Technical University of Berlin; Chinese Academy of Sciences; Research Center for Eco-Environmental Sciences (RCEES); Chinese Academy of Sciences; Institute of Urban Environment, CAS	1751-7362	2021	10.1038/s41396-021-01022-9
Ahmad, B; Wang, YH; Hao, J; Liu, YH; Bohnett, E; Zhang, KB	Variation of carbon density components with overstory structure of larch plantations in northwest China and its implication for optimal forest management	FOREST ECOLOGY AND MANAGEMENT	Article	Chinese Academy of Forestry; Research Institute of Forest Ecology, Environment and Protection, CAF; Beijing Forestry University; State University System of Florida; University of Florida	0378-1127	2021	10.1016/j.foreco.2021.119399
Alessandrino, L; Gervasio, MP; Vincenzi, F; Colombani, N; Castaldelli, G; Mastrocicco, M	Nutrients and carbon fate in two lowland contrasting soils amended with compost	CATENA	Article	Universita della Campania Vanvitelli; Marche Polytechnic University; University of Ferrara	0341-8162	2021	10.1016/j.catena.2021.105493
Hong, HL; Wu, SJ; Wang, Q; Dai, MY; Qian, L; Zhu, H; Li, JW; Zhang, J; Liu, JC; Li, J; Lu, HL; Yan, CL	Fluorescent dissolved organic matter facilitates the phytoavailability of copper in the coastal wetlands influenced by artificial topography	SCIENCE OF THE TOTAL ENVIRONMENT	Article	Xiamen University; Xiamen University; Virginia Polytechnic Institute & State University; Jiangsu University; Lanzhou University; Guangxi Normal University; Chinese Academy of Sciences; Institute of Urban Environment, CAS	0048-9697	2021	10.1016/j.scitotenv.2021.147855
Chen, Y; Yue, WZ; Liu, X; Zhang, LL; Chen, YA	Multi-Scenario Simulation for the Consequence of Urban Expansion on Carbon Storage: A Comparative Study in Central Asian Republics	LAND	Article	Ningbo University; Zhejiang University; East China Normal University; Zhejiang Gongshang University; Zhejiang University		2021	10.3390/land10060608
Fu, RX; Xu, XN; Yu, YC; Zhang, YB; Sun, ZL; Tao, X	Forest soil respiration response to increasing nitrogen deposition along an urban-rural gradient	GLOBAL ECOLOGY AND CONSERVATION	Article	Anhui Agricultural University; Nanjing Forestry University; Chinese Academy of Sciences; Shenyang Institute of Applied Ecology, CAS		2021	10.1016/j.gecco.2021.e01575
Niu, ZE; He, HL; Peng, SS; Ren, XL; Zhang, L; Gu, FX; Zhu, GF; Peng, CH; Li, P; Wang, JB; Ge, R; Zeng, N; Zhu, XB; Lv, Y; Chang, QQ; Xu, Q; Zhang, MY; Liu, WH	A Process-Based Model Integrating Remote Sensing Data for Evaluating Ecosystem Services	JOURNAL OF ADVANCES IN MODELING EARTH SYSTEMS	Article	Chinese Academy of Sciences; Institute of Geographic Sciences & Natural Resources Research, CAS; Chinese Academy of Sciences; Institute of Geographic Sciences & Natural Resources Research, CAS; Chinese Academy of Sciences; University of Chinese Academy of Sciences, CAS; Chinese Academy of Sciences; University of Chinese Academy of Sciences, CAS; Peking University; Ministry of Agriculture & Rural …		2021	10.1029/2020MS002451
Oulehle, F; Goodale, CL; Evans, CD; Chuman, T; Hruska, J; Krám, P; Navrátil, T; Tesar, M; Ac, A; Urban, O; Tahovská, K	Dissolved and gaseous nitrogen losses in forests controlled by soil nutrient stoichiometry	ENVIRONMENTAL RESEARCH LETTERS	Article	Czech Geological Survey; Czech Academy of Sciences; Global Change Research Centre of the Czech Academy of Sciences; Cornell University; UK Centre for Ecology & Hydrology (UKCEH); Czech Academy of Sciences; Institute of Geology of the Czech Academy of Sciences; Czech Academy of Sciences; Institute of Hydrodynamics of the Czech Academy of Sciences; University of South Bohemia Ceske Budejovice	1748-9326	2021	10.1088/1748-9326/ac007b
Page, J; Kåresdotter, E; Destouni, G; Pan, HZ; Kalantari, Z	A more complete accounting of greenhouse gas emissions and sequestration in urban landscapes	ANTHROPOCENE	Article	Stockholm University; Shanghai Jiao Tong University; Shanghai Jiao Tong University; Royal Institute of Technology	2213-3054	2021	10.1016/j.ancene.2021.100296
Zhang, PP; Wang, YQ; Sun, H; Qi, LJ; Liu, H; Wang, Z	Spatial variation and distribution of soil organic carbon in an urban ecosystem from high-density sampling	CATENA	Article	Chinese Academy of Sciences; Institute of Earth Environment, CAS; Chinese Academy of Sciences; University of Chinese Academy of Sciences, CAS	0341-8162	2021	10.1016/j.catena.2021.105364
Aboubakar, A; El Hajjaji, S; Douaik, A; Mewouo, YCM; Madong, RCBA; Dahchour, A; Mabrouki, J; Labjar, N	Heavy metal concentrations in soils and two vegetable crops (Corchorus olitorius and Solanum nigrum L.), their transfer from soil to vegetables and potential human health risks assessment at selected urban market gardens of Yaounde, Cameroon	INTERNATIONAL JOURNAL OF ENVIRONMENTAL ANALYTICAL CHEMISTRY	Article	Mohammed V University in Rabat; Mohammed V University in Rabat	0306-7319	2023	10.1080/03067319.2021.1910251
Zhang, Y; Tang, Q; Shi, PX; Katsumi, T	Influence of bio-clogging on permeability characteristics of soil	GEOTEXTILES AND GEOMEMBRANES	Article	Soochow University - China; Kyoto University	0266-1144	2021	10.1016/j.geotexmem.2020.11.010
Li, GY; Zhang, MX; Wu, CF	Short-term fallow practices drive soil bacterial community changes: A case study from China	APPLIED SOIL ECOLOGY	Article	Zhejiang University of Finance & Economics; Zhejiang University	0929-1393	2021	10.1016/j.apsoil.2021.103988
Strand, LT; Fjellstad, W; Jackson-Blake, L; De Wit, HA	Afforestation of a pasture in Norway did not result in higher soil carbon, 50 years after planting	LANDSCAPE AND URBAN PLANNING	Article	Norwegian University of Life Sciences; Norwegian Institute of Bioeconomy Research; Norwegian Institute for Water Research (NIVA); University of Oslo	0169-2046	2021	10.1016/j.landurbplan.2020.104007
Maan, I; Kaur, A; Singh, HP; Batish, DR; Kohli, RK	Exotic avenue plantations turning foe: Invasive potential, distribution and impact of Broussonetia papyrifera in Chandigarh, India	URBAN FORESTRY & URBAN GREENING	Article	Panjab University; Panjab University	1618-8667	2021	10.1016/j.ufug.2021.127010
Fernandes, KS; dos Santos, EO; Godoi, RHM; Yamamoto, CI; Barbosa, CGG; Souza, RAF; Machado, CMD	Characterization, Source Apportionment and Health Risk Assessment of PM2.5 for a Rural Classroom in the Amazon: A Case Study	JOURNAL OF THE BRAZILIAN CHEMICAL SOCIETY	Article	Universidade Federal de Amazonas; Universidade Federal do Parana; Universidade Federal do Parana; Universidade do Estado do Amazonas	0103-5053	2021	10.21577/0103-5053.20200188
Yang, L; Rees, RM; Nie, J; Xu, CX; Cao, WD	Carbon substrates exert a stronger role than mineral nitrogen application in structuring soil diazotroph communities during Chinese milk vetch growth	APPLIED SOIL ECOLOGY	Article	Peking University; Chinese Academy of Agricultural Sciences; Institute of Agricultural Resources & Regional Planning, CAAS; Scotland's Rural College; Hunan Academy of Agricultural Sciences; Jiangxi Academy of Agricultural Sciences; Nanjing Agricultural University	0929-1393	2021	10.1016/j.apsoil.2020.103778
Chen, S; Zhong, J; Li, C; Liu, J; Wang, WF; Xu, S; Li, SL	Coupled effects of hydrology and temperature on temporal dynamics of dissolved carbon in the Min River, Tibetan Plateau	JOURNAL OF HYDROLOGY	Article	Tianjin University; University of Hong Kong; Chinese Academy of Sciences; Guiyang Institute of Geochemistry, CAS; Huaiyin Normal University; Guizhou University of Finance & Economics	0022-1694	2021	10.1016/j.jhydrol.2020.125641
Hundertmark, WJ; Lee, MR; Smith, IA; Bang, AHY; Chen, VV; Gately, CK; Templer, PH; Hutyra, LR	Influence of landscape management practices on urban greenhouse gas budgets	CARBON BALANCE AND MANAGEMENT	Article	Boston University; Brown University; Boston University	1750-0680	2021	10.1186/s13021-020-00160-5
Li, XX; Huang, S; McBride, MB	Rhizosphere effect on Pb solubility and phytoavailability in Pb-Contaminated soils	ENVIRONMENTAL POLLUTION	Article	Cornell University	0269-7491	2021	10.1016/j.envpol.2020.115840
Ofori-Amanfo, KK; Klem, K; Veselá, B; Holub, P; Agyei, T; Marek, MV; Grace, J; Urban, O	Interactive Effect of Elevated CO2 and Reduced Summer Precipitation on Photosynthesis is Species-Specific: The Case Study with Soil-Planted Norway Spruce and Sessile Oak in a Mountainous Forest Plot	FORESTS	Article	Czech Academy of Sciences; Global Change Research Centre of the Czech Academy of Sciences; Mendel University in Brno; Slovak University of Technology Bratislava; University of Edinburgh		2021	10.3390/f12010042
Qi, Q; Yue, HW; Zhang, ZH; Van Nostrand, JD; Wu, LW; Xue, G; Feng, JJ; Wang, MM; Yang, SH; Zhao, JS; Qun, G; Zhang, QT; Zhao, MX; Xie, CY; Ma, ZY; He, JS; Chu, HY; Yi, H; Zhou, JZ; Yang, YF	Microbial Functional Responses Explain Alpine Soil Carbon Fluxes under Future Climate Scenarios	MBIO	Article	Tsinghua University; Chinese Academy of Sciences; University of Oklahoma System; University of Oklahoma - Norman; University of Oklahoma System; University of Oklahoma - Norman; South China Normal University; Tsinghua University; Peking University; Peking University; Chinese Academy of Sciences; Institute of Soil Science, CAS; Peking University; United States Department of Energy (DOE); Lawrence …	2150-7511	2021	10.1128/mBio.00761-20
She, RH; Yu, YX; Ge, CR; Yao, HY	Soil Texture Alters the Impact of Salinity on Carbon Mineralization	AGRONOMY-BASEL	Article	Wuhan Institute of Technology; Chinese Academy of Sciences; Institute of Urban Environment, CAS; Chinese Academy of Sciences		2021	10.3390/agronomy11010128
Zhang, GH; Liu, D; Lin, JJ; Kumar, A; Jia, KT; Tian, XX; Yu, ZG; Zhu, B	Priming effects induced by degradable microplastics in agricultural soils	SOIL BIOLOGY & BIOCHEMISTRY	Article	Chongqing Three Gorges University; Nanjing University of Information Science & Technology; Peking University; Peking University	0038-0717	2023	10.1016/j.soilbio.2023.109006
Qu, JH; Liu, RX; Bi, XW; Li, ZR; Li, KG; Hu, Q; Zhang, XR; Zhang, GS; Ma, SY; Zhang, Y	Remediation of atrazine contaminated soil by microwave activated persulfate system: Performance, mechanism and DFT calculation	JOURNAL OF CLEANER PRODUCTION	Article	Northeast Agricultural University - China; Shenyang Pharmaceutical University; Harbin Institute of Technology	0959-6526	2023	10.1016/j.jclepro.2023.136546
Ma, XZ; Li, SL; Pan, RK; Wang, ZQ; Li, JY; Zhang, X; Azeem, M; Yao, YQ; Xu, ZY; Pan, JT; Zhang, ZQ; Li, RH	Effect of biochar on the mitigation of organic volatile fatty acid emission during aerobic biostabilization of biosolids and the underlying mechanism	JOURNAL OF CLEANER PRODUCTION	Article	Northwest A&F University - China; Qinghai University; North Minzu University; Chinese Academy of Sciences; Institute of Urban Environment, CAS; Arid Agriculture University; Northwest A&F University - China; Chinese Academy of Agricultural Sciences; Institute of Agricultural Resources & Regional Planning, CAAS; Ministry of Agriculture & Rural Affairs	0959-6526	2023	10.1016/j.jclepro.2023.136213
Castelo-Cabay, M; Piedra-Fernandez, JA; Ayala, R	Deep learning for land use and land cover classification from the Ecuadorian Paramo.	INTERNATIONAL JOURNAL OF DIGITAL EARTH	Article	Universidad de Almeria	1753-8947	2022	10.1080/17538947.2022.2088872
Zhou, SYD; Lie, ZY; Liu, XJ; Zhu, YG; Peñuelas, J; Neilson, R; Su, XX; Liu, ZF; Chu, GW; Meng, Z; Yan, JH; Liu, JX	Distinct patterns of soil bacterial and fungal community assemblages in subtropical forest ecosystems under warming	GLOBAL CHANGE BIOLOGY	Article	Chinese Academy of Sciences; South China Botanical Garden, CAS; Chinese Academy of Sciences; South China Botanical Garden, CAS; Chinese Academy of Sciences; Institute of Urban Environment, CAS; Centro de Investigacion Ecologica y Aplicaciones Forestales (CREAF-CERCA); Consejo Superior de Investigaciones Cientificas (CSIC); James Hutton Institute; Southwest University - China	1354-1013	2023	10.1111/gcb.16541
Yang, Y; Chai, YB; Xie, HJ; Zhang, L; Zhang, ZM; Yang, X; Hao, SL; Gai, JP; Chen, YL	Responses of soil microbial diversity, network complexity and multifunctionality to three land-use changes	SCIENCE OF THE TOTAL ENVIRONMENT	Article	China Agricultural University; Chinese Academy of Sciences; Research Center for Eco-Environmental Sciences (RCEES); Yunnan University	0048-9697	2023	10.1016/j.scitotenv.2022.160255
Ma, HL; Li, XJ; Zeng, JY; Zhang, X; Dong, JZ; Chen, NC; Fan, L; Sadeghi, M; Frappart, F; Liu, XZ; Wang, MJ; Wang, H; Fu, Z; Xing, ZP; Ciais, P; Wigneron, JP	An assessment of L-band surface soil moisture products from SMOS and SMAP in the tropical areas	REMOTE SENSING OF ENVIRONMENT	Article	Wuhan University; UDICE-French Research Universities; Universite de Bordeaux; INRAE; Chinese Academy of Sciences; China University of Geosciences; Massachusetts Institute of Technology (MIT); Southwest University - China; Peking University; UDICE-French Research Universities; Universite Paris Cite; Universite Paris Saclay; CEA; Centre National de la Recherche Scientifique (CNRS); Chinese Academy …	0034-4257	2023	10.1016/j.rse.2022.113344
Rao, WE; Shen, ZH; Duan, XW	Spatiotemporal patterns and drivers of soil erosion in Yunnan, Southwest China: RULSE assessments for recent 30 years and future predictions based on CMIP6	CATENA	Article	Peking University; Yunnan University	0341-8162	2023	10.1016/j.catena.2022.106703
Chen, YC; Zhang, L; Hu, HM; Wu, RX; Ling, J; Yue, SQ; Yang, D; Yu, WF; Du, W; Shen, GF; Zhao, MR	Neonicotinoid pollution in marine sediments of the East China Sea	SCIENCE OF THE TOTAL ENVIRONMENT	Article	Zhejiang University of Technology; Kunming University of Science & Technology; East China Normal University; Peking University	0048-9697	2022	10.1016/j.scitotenv.2022.156658
Yan, Y; Ji, WJ; Li, BG; Wang, GM; Hu, BF; Zhang, C; Mouazen, AM	Effects of Long-Term Straw Return and Environmental Factors on the Spatiotemporal Variability of Soil Organic Matter in the Black Soil Region: A Case Study	AGRONOMY-BASEL	Article	China Agricultural University; Ministry of Natural Resources of the People's Republic of China; China Agricultural University; Jiangxi University of Finance & Economics; INRAE; Ghent University		2022	10.3390/agronomy12102532
Yang, JX; Ma, X; Zhao, XY; Li, WQ	Spatiotemporal of the Coupling Relationship between Ecosystem Services and Human Well-Being in Guanzhong Plain Urban Agglomeration	INTERNATIONAL JOURNAL OF ENVIRONMENTAL RESEARCH AND PUBLIC HEALTH	Article	Northwest Normal University - China; Lanzhou University		2022	10.3390/ijerph191912535
Ponette-González, AG; Chen, DM; Elderbrock, E; Rindy, JE; Barrett, TE; Luce, BW; Lee, JH; Ko, YK; Weathers, KC	Urban edge trees: Urban form and meteorology drive elemental carbon deposition to canopies and soils	ENVIRONMENTAL POLLUTION	Article	University of North Texas System; University of North Texas Denton; University of Oregon; University of Oregon; Cary Institute of Ecosystem Studies; Boston University	0269-7491	2022	10.1016/j.envpol.2022.120197
Wu, JY; Huang, YT; Jiang, WK	Spatial matching and value transfer assessment of ecosystem services supply and demand in urban agglomerations: A case study of the Guangdong-Hong Kong-Macao Greater Bay area in China	JOURNAL OF CLEANER PRODUCTION	Article	South China University of Technology	0959-6526	2022	10.1016/j.jclepro.2022.134081
Li, ZH; Wu, HW; Wu, F	Impacts of urban forms and socioeconomic factors on CO2 emissions: A spatial econometric analysis	JOURNAL OF CLEANER PRODUCTION	Article	Chinese Academy of Sciences; Institute of Geographic Sciences & Natural Resources Research, CAS; Chinese Academy of Sciences; Chinese Academy of Sciences; University of Chinese Academy of Sciences, CAS; Beijing Forestry University	0959-6526	2022	10.1016/j.jclepro.2022.133722
Wang, C; Wang, LY; Zhan, JY; Liu, W; Teng, YM; Chu, X; Wang, HH	Spatial heterogeneity of urbanization impacts on ecosystem services in the urban agglomerations along the Yellow River, China	ECOLOGICAL ENGINEERING	Article	Beijing Normal University; Shandong Normal University; Dongguan University of Technology	0925-8574	2022	10.1016/j.ecoleng.2022.106717
Jiang, JH; Wang, FH; Yang, X; Zhang, YP; Deng, JW; Wei, QP; Cai, WL; Chen, CF	Evaluation of the long-term performance of the deep U-type borehole heat exchanger on different geological parameters using the Taguchi method	JOURNAL OF BUILDING ENGINEERING	Article	Xi'an Jiaotong University; Ministry of Natural Resources of the People's Republic of China; Tsinghua University; Helmholtz Association; Helmholtz Center for Environmental Research (UFZ)		2022	10.1016/j.jobe.2022.105122
Barroso, GC; Abril, G; Machado, W; Abuchacra, RC; Peixoto, RB; Bernardes, M; Marques, GS; Sanders, CJ; Oliveira, GB; Oliveira, SR; Amora-Nogueira, L; Marotta, H	Linking eutrophication to carbon dioxide and methane emissions from exposed mangrove soils along an urban gradient	SCIENCE OF THE TOTAL ENVIRONMENT	Article	Universidade Federal Fluminense; Universidade Federal Fluminense; UDICE-French Research Universities; Sorbonne Universite; Centre National de la Recherche Scientifique (CNRS); Institut de Recherche pour le Developpement (IRD); Museum National d'Histoire Naturelle (MNHN); Southern Cross University; Universidade Federal Fluminense	0048-9697	2022	10.1016/j.scitotenv.2022.157988
Hong, YS; Chen, YY; Chen, SC; Shen, RL; Hu, BF; Peng, J; Wang, N; Guo, L; Zhuo, ZQ; Yang, YY; Liu, YL; Mouazen, AM; Shi, Z	Data mining of urban soil spectral library for estimating organic carbon	GEODERMA	Article	Zhejiang University; Wuhan University; Jiangxi University of Finance & Economics; Tarim University; Huazhong Agricultural University; Zhejiang Academy of Agricultural Sciences; Hangzhou City University; Ghent University; Vytautas Magnus University	0016-7061	2022	10.1016/j.geoderma.2022.116102
Berggren, M; Guillemette, F; Bieroza, M; Buffam, I; Deininger, A; Hawkes, JA; Kothawala, DN; LaBrie, R; Lapierre, JF; Murphy, KR; Al-Kharusi, ES; Rulli, MPD; Hensgens, G; Younes, H; Wünsch, UJ	Unified understanding of intrinsic and extrinsic controls of dissolved organic carbon reactivity in aquatic ecosystems	ECOLOGY	Article	Lund University; University of Quebec; University of Quebec Trois Rivieres; Swedish University of Agricultural Sciences; Swedish University of Agricultural Sciences; Norwegian Institute for Water Research (NIVA); University of Agder; Uppsala University; Uppsala University; Universite de Montreal; Chalmers University of Technology	0012-9658	2022	10.1002/ecy.3763
Wang, XY; Cai, Y; Liu, G; Zhang, MY; Bai, YP; Zhang, F	Carbon emission accounting and spatial distribution of industrial entities in Beijing-Combining nighttime light data and urban functional areas	ECOLOGICAL INFORMATICS	Article	Capital Normal University; Capital Normal University; Beijing Forestry University; Chinese Academy of Sciences; Institute of Geographic Sciences & Natural Resources Research, CAS; Chinese Academy of Sciences; University of Chinese Academy of Sciences, CAS; China University of Geosciences	1574-9541	2022	10.1016/j.ecoinf.2022.101759
Gbeddy, G; Egodawatta, P; Akortia, E; Goonetilleke, A	Inherent and external factors influencing the distribution of PAHs, hydroxy-PAHs, carbonyl-PAHs and nitro-PAHs in urban road dust	ENVIRONMENTAL POLLUTION	Article	Queensland University of Technology (QUT)	0269-7491	2022	10.1016/j.envpol.2022.119705
Liu, YW; Piao, SL; Makowski, D; Ciais, P; Gasser, T; Song, J; Wan, SQ; Peñuelas, J; Janssens, IA	Data-driven quantification of nitrogen enrichment impact on Northern Hemisphere plant biomass	ENVIRONMENTAL RESEARCH LETTERS	Article	Chinese Academy of Sciences; Institute of Tibetan Plateau Research, CAS; Peking University; AgroParisTech; UDICE-French Research Universities; Universite Paris Saclay; INRAE; UDICE-French Research Universities; Universite Paris Saclay; CEA; Centre National de la Recherche Scientifique (CNRS); International Institute for Applied Systems Analysis (IIASA); Hebei University; University of Barcelona; …	1748-9326	2022	10.1088/1748-9326/ac7b38
Pan, HY; Zheng, XY; Tian, X; Geng, Y; Zhang, XH; Xiao, SJ; Gao, ZY; Yang, YX; Liu, XC; Li, L; Huang, CY; Deng, SH; Liu, Q	Toward sustainable crop production in China: A co-benefits evaluation	JOURNAL OF CLEANER PRODUCTION	Article	Sichuan Agricultural University; Shanghai Jiao Tong University; Shanghai Jiao Tong University	0959-6526	2022	10.1016/j.jclepro.2022.132285
Xu, P; Houlton, BZ; Zheng, Y; Zhou, F; Ma, L; Li, B; Liu, X; Li, G; Lu, HY; Quan, F; Hu, SY; Chen, AP	Policy-enabled stabilization of nitrous oxide emissions from livestock production in China over 1978-2017	NATURE FOOD	Article	Southern University of Science & Technology; Cornell University; Cornell University; Southern University of Science & Technology; Southern University of Science & Technology; Peking University; Chinese Academy of Sciences; Institute of Genetics & Developmental Biology, CAS; Hunan Agricultural University; Hong Kong University of Science & Technology; Hong Kong University of Science & Technology (G…		2022	10.1038/s43016-022-00513-y
Zhou, JN; Chen, XS; Zhou, YZ; Wang, WY; Wang, P; Kong, XL; Xu, Y; Geng, HS; Jin, FN	Blast responses of polyurea retrofitted utility tunnel reinforced with basalt fibre reinforced polymer bars	DEFENCE TECHNOLOGY	Article	Army Engineering University of PLA	2096-3459	2022	10.1016/j.dt.2021.03.024
Li, XY; Huang, CS; Jin, HJ; Han, YL; Kang, SQ; Liu, J; Cai, HY; Hu, TX; Yang, G; Yu, HZ; Sun, L	Spatio-Temporal Patterns of Carbon Storage Derived Using the InVEST Model in Heilongjiang Province, Northeast China	FRONTIERS IN EARTH SCIENCE	Article	Northeast Forestry University - China; Chinese Academy of Sciences; Northeast Forestry University - China		2022	10.3389/feart.2022.846456
Zhang, ZR; Gao, XX; Zhang, SB; Gao, H; Huang, J; Sun, SY; Song, XF; Fry, E; Tian, HQ; Xia, XH	Urban development enhances soil organic carbon storage through increasing urban vegetation	JOURNAL OF ENVIRONMENTAL MANAGEMENT	Article	Beijing Normal University; Guangdong University of Technology; Edge Hill University; Auburn University System; Auburn University	0301-4797	2022	10.1016/j.jenvman.2022.114922
Meng, B; Li, JQ; Yao, Y; Nippert, JB; Williams, DG; Chai, H; Collins, SL; Sun, W	Soil N enrichment mediates carbon allocation through respiration in a dominant grass during drought	FUNCTIONAL ECOLOGY	Article	Northeast Normal University - China; Peking University; Peking University; Kansas State University; University of Wyoming; University of New Mexico	0269-8463	2022	10.1111/1365-2435.14033
Guerrero, P; Haase, D; Albert, C	Identifying Spatial Patterns and Ecosystem Service Delivery of Nature-Based Solutions	ENVIRONMENTAL MANAGEMENT	Article	Ruhr University Bochum; Humboldt University of Berlin; Helmholtz Association; Helmholtz Center for Environmental Research (UFZ)	0364-152X	2022	10.1007/s00267-022-01613-y
Fan, YX; Wei, F	Contributions of Natural Carbon Sink Capacity and Carbon Neutrality in the Context of Net-Zero Carbon Cities: A Case Study of Hangzhou	SUSTAINABILITY	Article	Zhejiang University; Zhejiang University		2022	10.3390/su14052680
Li, M; Zheng, P; Pan, WB	Spatial-Temporal Variation and Tradeoffs/Synergies Analysis on Multiple Ecosystem Services: A Case Study in Fujian	SUSTAINABILITY	Article	Fuzhou University		2022	10.3390/su14053086
Ning, QS; Jiang, LC; Niu, GX; Yu, Q; Liu, JS; Wang, RZ; Liao, S; Huang, JH; Han, XG; Yang, JJ	Mowing increased plant diversity but not soil microbial biomass under N-enriched environment in a temperate grassland	PLANT AND SOIL	Article; Early Access	Chinese Academy of Sciences; Institute of Botany, CAS; Chinese Academy of Sciences; University of Chinese Academy of Sciences, CAS; Chinese Academy of Sciences; South China Botanical Garden, CAS; Chinese Academy of Agricultural Sciences; Institute of Agricultural Resources & Regional Planning, CAAS; Northeast Normal University - China; Chinese Academy of Sciences; Shenyang Institute of Applied Ec…	0032-079X	2022	10.1007/s11104-022-05332-5
Garvey, SM; Templer, PH; Pierce, EA; Reinmann, AB; Hutyra, LR	Diverging patterns at the forest edge: Soil respiration dynamics of fragmented forests in urban and rural areas	GLOBAL CHANGE BIOLOGY	Article	Boston University; Boston University; City University of New York (CUNY) System; City University of New York (CUNY) System; Hunter College (CUNY); City University of New York (CUNY) System; University of Wisconsin System; University of Wisconsin Madison	1354-1013	2022	10.1111/gcb.16099
Feng, WL; Zhang, YF; Huang, LL; Li, YL; Guo, QK; Peng, HY; Shi, L	Spatial distribution, pollution characterization, and risk assessment of environmentally persistent free radicals in urban road dust from central China	ENVIRONMENTAL POLLUTION	Article	Zhoukou Normal University; Zhoukou Normal University; Guilin University of Technology; Henan University of Engineering	0269-7491	2022	10.1016/j.envpol.2022.118861
Yu, JL; Wan, LF; Liu, GH; Ma, KM; Cheng, H; Shen, Y; Liu, YQ; Su, XK	A Meta-Analysis on Degraded Alpine Grassland Mediated by Climate Factors: Enlightenment for Ecological Restoration	FRONTIERS IN PLANT SCIENCE	Article	Chinese Academy of Sciences; Research Center for Eco-Environmental Sciences (RCEES); Chinese Academy of Sciences; University of Chinese Academy of Sciences, CAS	1664-462X	2022	10.3389/fpls.2021.821954
Deng, YY; Chen, XY; Yao, XD; Dong, LZ; Zhang, HJ; Zeng, H; Wang, W	No thermal adaptation in soil extracellular enzymes across a temperate grassland region	SOIL BIOLOGY & BIOCHEMISTRY	Article	Peking University; Peking University; Peking University	0038-0717	2022	10.1016/j.soilbio.2021.108540
Huang, BB; Lu, F; Wang, XK; Wu, X; Zhang, L; Ouyang, ZY	Ecological restoration and rising CO2 enhance the carbon sink, counteracting climate change in northeastern China	ENVIRONMENTAL RESEARCH LETTERS	Article	Chinese Academy of Sciences; Research Center for Eco-Environmental Sciences (RCEES); Chinese Academy of Sciences; University of Chinese Academy of Sciences, CAS	1748-9326	2022	10.1088/1748-9326/ac3871
Khalid, M; Tan, HX; Ali, M; Rehman, A; Liu, XX; Su, LT; Saeed-ur-Rahman; Zhao, C; Li, XX; Hui, N	Karst rocky desertification diverged the soil residing and the active ectomycorrhizal fungal communities thereby fostering distinctive extramatrical mycelia	SCIENCE OF THE TOTAL ENVIRONMENT	Article	Shanghai Jiao Tong University; Shanghai Jiao Tong University	0048-9697	2022	10.1016/j.scitotenv.2021.151016
Jeon, M; Guerra, HB; Choi, H; Kwon, D; Kim, H; Kim, LH	Stormwater Runoff Treatment Using Rain Garden: Performance Monitoring and Development of Deep Learning-Based Water Quality Prediction Models	WATER	Article	Kongju National University; Kongju National University		2021	10.3390/w13243488
Matej-Lukowicz, K; Wojciechowska, E; Strycharz, J; Szubska, M; Kulinski, K; Beldowski, J; Winogradow, A	Can Bottom Sediments Be a Prospective Fertilizing Material? A Chemical Composition Analysis for Potential Reuse in Agriculture	MATERIALS	Article	Fahrenheit Universities; Gdansk University of Technology; Polish Academy of Sciences; Institute of Oceanology of the Polish Academy of Sciences		2021	10.3390/ma14247685
Li, XY; Suoerdahan, G; Shi, ZY; Xing, ZH; Ren, YX; Yang, R	Spatial-Temporal Impacts of Urban Sprawl on Ecosystem Services: Implications for Urban Planning in the Process of Rapid Urbanization	LAND	Article	Jilin University; Chinese Academy of Sciences; Northeast Institute of Geography & Agroecology, CAS		2021	10.3390/land10111210
Liu, XB; He, B; Guo, LL; Huang, L; Yuan, WP; Chen, XZ; Hao, XM; Xie, XM; Zhang, YF; Zhong, ZQ; Li, TW; Chen, AF	European Carbon Uptake has Not Benefited From Vegetation Greening	GEOPHYSICAL RESEARCH LETTERS	Article	Beijing Normal University; Beijing Normal University; Peking University; Sun Yat Sen University; Chinese Academy of Sciences; Xinjiang Institute of Ecology & Geography, CAS; Southern University of Science & Technology	0094-8276	2021	10.1029/2021GL094870
Jorge, NF; Clark, J; Cárdenas, ML; Geoghegan, H; Shannon, V	Measuring Soil Colour to Estimate Soil Organic Carbon Using a Large-Scale Citizen Science-Based Approach	SUSTAINABILITY	Article	University of Reading		2021	10.3390/su131911029
Wang, YR; Song, JX; Zhang, XX; Sun, HT	Sustainable Development Evaluation and Its Obstacle Factors of the Weihe River Basin in Shaanxi Province, China	FRONTIERS IN EARTH SCIENCE	Article	Chinese Academy of Sciences; Institute of Soil & Water Conservation (ISWC), CAS; Ministry of Water Resources; Chinese Academy of Sciences; University of Chinese Academy of Sciences, CAS; Northwest University Xi'an		2021	10.3389/feart.2021.744224
Islamd, MS; Idris, AM; Islam, AMT; Phoungthong, K; Ali, MM; Kabir, MH	Geochemical variation and contamination level of potentially toxic elements in land-uses urban soils	INTERNATIONAL JOURNAL OF ENVIRONMENTAL ANALYTICAL CHEMISTRY	Article; Early Access	King Khalid University; King Khalid University; Prince of Songkla University; Sher-e-Bangla Agricultural University (SAU); Mawlana Bhashani Science & Technology University	0306-7319	2021	10.1080/03067319.2021.1977286
Zhao, ZH; Gao, SF; Lu, CY; Li, XY; Wang, TY	Soil organic carbon fractions and its association with water-stable aggregates under different fertilization management practices	SOIL USE AND MANAGEMENT	Article	Henan University of Urban Construction; Chinese Academy of Sciences; Institute of Soil Science, CAS; Shanxi Agricultural University; Nanjing Forestry University	0266-0032	2022	10.1111/sum.12758
Guo, XM; Wang, L; Ma, F; You, YQ; Ju, C	Multi-level methods to quantify risk assessment, source apportionment and identifying key risk areas of soil toxic elements in Ashi River watershed, China	SCIENCE OF THE TOTAL ENVIRONMENT	Article	Harbin Institute of Technology	0048-9697	2021	10.1016/j.scitotenv.2021.149385
Ji, XY; Tang, YC; Ye, J; Wu, SC; Hou, MF; Huang, SH; Wang, R	The effect of carbon-based copper nanocomposites on Microcystis aeruginosa and the movability of antibiotic resistance genes in urban water	CHEMOSPHERE	Article	Shanghai Institute of Technology; Guangdong Academy of Sciences; Institute of Eco-environmental & Soil Sciences, Guangdong Academy of Sciences; Shanghai Institute of Technology	0045-6535	2022	10.1016/j.chemosphere.2021.131744
Ji, YY; Tang, QQ; Yan, LY; Wu, SJ; Yan, LM; Tan, DM; Chen, JL; Chen, Q	Spatiotemporal Variations and Influencing Factors of Terrestrial Evapotranspiration and Its Components during Different Impoundment Periods in the Three Gorges Reservoir Area	WATER	Article	Chinese Academy of Sciences; Chongqing Institute of Green & Intelligent Technology, CAS; Chinese Academy of Sciences; University of Chinese Academy of Sciences, CAS; Tibet Academy of Agriculture & Animal Husbandry Sciences		2021	10.3390/w13152111
Wu, DH; Liu, D; Wang, T; Ding, JZ; He, YJ; Ciais, P; Zhang, GX; Piao, SL	Carbon turnover times shape topsoil carbon difference between Tibetan Plateau and Arctic tundra	SCIENCE BULLETIN	Article	Peking University; Chinese Academy of Sciences; Institute of Tibetan Plateau Research, CAS; Chinese Academy of Sciences; University of California System; University of California Irvine; UDICE-French Research Universities; Universite Paris Cite; Universite Paris Saclay; CEA; Centre National de la Recherche Scientifique (CNRS)	2095-9273	2021	10.1016/j.scib.2021.04.019
Wang, YH; Zhang, Q; Majidzadeh, H; He, C; Shi, Q; Kong, SF; Yang, ZB; Wang, JJ	Depletion of Soil Water-Extractable Organic Matter With Long-Term Coverage by Impervious Surfaces	FRONTIERS IN ENVIRONMENTAL SCIENCE	Article	Southern University of Science & Technology; Southern University of Science & Technology; Wuhan University; China University of Petroleum; Shenzhen Institute of Information Technology		2021	10.3389/fenvs.2021.714311
Wan, Y; Li, WJ; Wang, J; Shi, XJ	Bacterial Diversity and Community in Response to Long-Term Nitrogen Fertilization Gradient in Citrus Orchard Soils	DIVERSITY-BASEL	Article	Chongqing Jiaotong University; Chongqing Jiaotong University; Southwest University - China		2021	10.3390/d13070282
Upadhyay, S; Singh, R; Verma, P; Raghubanshi, AS	Spatio-temporal variability in soil CO2 efflux and regulatory physicochemical parameters from the tropical urban natural and anthropogenic land use classes	JOURNAL OF ENVIRONMENTAL MANAGEMENT	Article	Banaras Hindu University (BHU)	0301-4797	2021	10.1016/j.jenvman.2021.113141
Gonzalez, A; Millet, DB; Yu, XY; Wells, KC; Griffis, TJ; Baier, BC; Campbell, PC; Choi, YH; DiGangi, JP; Gvakharia, A; Halliday, HS; Kort, EA; McKain, K; Nowak, JB; Plant, G	Fossil Versus Nonfossil CO Sources in the US: New Airborne Constraints From ACT-America and GEM	GEOPHYSICAL RESEARCH LETTERS	Article	University of Minnesota System; University of Minnesota Twin Cities; University of Colorado System; University of Colorado Boulder; National Oceanic Atmospheric Admin (NOAA) - USA; George Mason University; National Oceanic Atmospheric Admin (NOAA) - USA; National Aeronautics & Space Administration (NASA); NASA Langley Research Center; University of Michigan System; University of Michigan	0094-8276	2021	10.1029/2021GL093361
Li, D; Van de Werfhorst, LC; Rugh, MB; Feraud, M; Hung, WC; Jay, J; Cao, YP; Parker, EA; Grant, SB; Holden, PA	Limited Bacterial Removal in Full-Scale Stormwater Biofilters as Evidenced by Community Sequencing Analysis	ENVIRONMENTAL SCIENCE & TECHNOLOGY	Article	University of California System; University of California Santa Barbara; University of California System; University of California Los Angeles; Virginia Polytechnic Institute & State University; Virginia Polytechnic Institute & State University	0013-936X	2021	10.1021/acs.est.1c00510
Wang, W; Zhang, YY; Du, W; Tao, S	Water-induced release of recalcitrant polycyclic aromatic hydrocarbons from soil organic matter during microwave-assisted solvent extraction*	ENVIRONMENTAL POLLUTION	Article	Peking University; Westlake University; Westlake University; East China Normal University	0269-7491	2021	10.1016/j.envpol.2021.117493
Felgate, SL; Barry, CDG; Mayor, DJ; Sanders, R; Carrias, A; Young, A; Fitch, A; Mayorga-Adame, CG; Andrews, G; Brittain, H; Cryer, SE; Evans, CD; Goddard-Dwyer, M; Holt, JT; Hughes, BK; Lapworth, DJ; Pinder, A; Price, DM; Rosado, S; Evans, C	Conversion of Forest to Agriculture Increases Colored Dissolved Organic Matter in a Subtropical Catchment and Adjacent Coastal Environment	JOURNAL OF GEOPHYSICAL RESEARCH-BIOGEOSCIENCES	Article	University of Southampton; NERC National Oceanography Centre; UK Centre for Ecology & Hydrology (UKCEH); Bjerknes Centre for Climate Research; Norwegian Research Centre (NORCE); NERC National Oceanography Centre; University of Liverpool; University of Southampton; UK Research & Innovation (UKRI); Natural Environment Research Council (NERC); NERC British Geological Survey	2169-8953	2021	10.1029/2021JG006295
Zhang, L; Ge, AH; Tóth, T; An, FH; Guo, LL; Nie, ZY; Liu, JB; Yang, F; Wang, ZC	Soil bacterial microbiota predetermines rice yield in reclaiming saline-sodic soils leached with brackish ice	JOURNAL OF THE SCIENCE OF FOOD AND AGRICULTURE	Article	Chinese Academy of Sciences; Northeast Institute of Geography & Agroecology, CAS; Chinese Academy of Sciences; University of Chinese Academy of Sciences, CAS; Chinese Academy of Sciences; Research Center for Eco-Environmental Sciences (RCEES); Eotvos Lorand Research Network; Hungarian Academy of Sciences; Hungarian Centre for Agricultural Research	0022-5142	2021	10.1002/jsfa.11319
Zhang, WW; Liu, W; He, SW; Chen, QC; Han, JG; Zhang, QF	Mixed plantations of Metasequoia glyptostroboides and Bischofia polycarpa change soil fungal and archaeal communities and enhance soil phosphorus availability in Shanghai, China	ECOLOGY AND EVOLUTION	Article	Chinese Academy of Sciences	2045-7758	2021	10.1002/ece3.7532
Ao, L; Zhao, MC; Li, X; Sun, GY	Different Urban Forest Tree Species Affect the Assembly of the Soil Bacterial and Fungal Community	MICROBIAL ECOLOGY	Article	Northeast Forestry University - China; Northeast Agricultural University - China; Northeast Forestry University - China	0095-3628	2022	10.1007/s00248-021-01754-3
Li, LJ; Jiang, B; Wan, YN; Li, JM; Ma, YB	Integrating bioavailability and aging in the criteria derivation of cadmium for the safe production of rice in paddy soils	ECOTOXICOLOGY AND ENVIRONMENTAL SAFETY	Article	Chinese Academy of Agricultural Sciences; Institute of Agricultural Resources & Regional Planning, CAAS; Beijing Municipal Research Institute of Environment; Macau University of Science & Technology	0147-6513	2021	10.1016/j.ecoenv.2021.112356
Di Martino, RMR; Capasso, G	On the complexity of anthropogenic and geological sources of carbon dioxide: Onsite differentiation using isotope surveying	ATMOSPHERIC ENVIRONMENT	Article	Istituto Nazionale Geofisica e Vulcanologia (INGV)	1352-2310	2021	10.1016/j.atmosenv.2021.118446
Yuan, X; Qin, WK; Chen, Y; Xu, TL; Chen, KL; Zhu, BA	Plateau pika offsets the positive effects of warming on soil organic carbon in an alpine swamp meadow on the Tibetan Plateau	CATENA	Article	Peking University; Peking University; Qinghai Normal University	0341-8162	2021	10.1016/j.catena.2021.105417
Gao, J; Tang, XG; Lin, SQ; Bian, HY	The Influence of Land Use Change on Key Ecosystem Services and Their Relationships in a Mountain Region from Past to Future (1995-2050)	FORESTS	Article	Southwest University - China; Southwest University - China		2021	10.3390/f12050616
Yang, RR; Fang, JH; Cao, QQ; Zhao, D; Dong, JY; Wang, RQ; Liu, J	The content, composition, and influencing factors of organic carbon in the sediments of two types of constructed wetlands	ENVIRONMENTAL SCIENCE AND POLLUTION RESEARCH	Article	Shandong University; Shandong Jianzhu University; Shandong University	0944-1344	2021	10.1007/s11356-021-14134-8
Oka, A; Takahashi, J; Endoh, Y; Seino, T	Bark Effects on Stemflow Chemistry in a Japanese Temperate Forest I. The Role of Bark Surface Morphology	FRONTIERS IN FORESTS AND GLOBAL CHANGE	Article	University of Tsukuba; University of Tsukuba; University of Tsukuba		2021	10.3389/ffgc.2021.654375
Delibas, M; Tezer, A; Bacchin, TK	Towards embedding soil ecosystem services in spatial planning	CITIES	Article	Istanbul Technical University; Istanbul Technical University	0264-2751	2021	10.1016/j.cities.2021.103150
Park, JH; Gan, JB; Park, C	Discrepancies between Global Forest Net Primary Productivity Estimates Derived from MODIS and Forest Inventory Data and Underlying Factors	REMOTE SENSING	Article	Korea Environment Institute (KEI); Texas A&M University System; Texas A&M University College Station; University of Seoul		2021	10.3390/rs13081441
Su, XX; Yang, XR; Li, H; Wang, HT; Wang, YM; Xu, JX; Ding, K; Zhu, YG	Bacterial communities are more sensitive to ocean acidification than fungal communities in estuarine sediments	FEMS MICROBIOLOGY ECOLOGY	Article	Chinese Academy of Sciences; Institute of Urban Environment, CAS; Chinese Academy of Sciences; University of Chinese Academy of Sciences, CAS; Fuzhou University; Chinese Academy of Sciences; Research Center for Eco-Environmental Sciences (RCEES)	0168-6496	2021	10.1093/femsec/fiab058
Zhu, XD; Hou, YW; Zhang, YG; Lu, XL; Liu, ZQ; Weng, QH	Potential of Sun-Induced Chlorophyll Fluorescence for Indicating Mangrove Canopy Photosynthesis	JOURNAL OF GEOPHYSICAL RESEARCH-BIOGEOSCIENCES	Article	Xiamen University; Southern Marine Science & Engineering Guangdong Laboratory; Southern Marine Science & Engineering Guangdong Laboratory (Zhuhai); Nanjing University; Chinese Academy of Sciences; Institute of Soil & Water Conservation (ISWC), CAS; Northwest A&F University - China	2169-8953	2021	10.1029/2020JG006159
Sun, XD; Wang, G; Ye, YQ; Ma, QX; Guan, QW; Jones, DL	Response of nitrogen fractions in the rhizosphere and bulk soil to organic mulching in an urban forest plantation	JOURNAL OF FORESTRY RESEARCH	Article	Nanjing Forestry University; Bangor University	1007-662X	2021	10.1007/s11676-021-01310-2
Burns, EA	Placing regenerative farming on environmental educators' horizons	AUSTRALIAN JOURNAL OF ENVIRONMENTAL EDUCATION	Article	University of Waikato	0814-0626	2021	10.1017/aee.2020.21
Le Noë, J; Erb, KH; Matej, S; Magerl, A; Bhan, M; Gingrich, S	Socio-ecological drivers of long-term ecosystem carbon stock trend: An assessment with the LUCCA model of the French case	ANTHROPOCENE	Article	University of Natural Resources & Life Sciences, Vienna	2213-3054	2021	10.1016/j.ancene.2020.100275
Shang, B; Xu, YS; Peng, JL; Agathokleous, E; Feng, ZZ	High nitrogen addition decreases the ozone flux by reducing the maximum stomatal conductance in poplar saplings	ENVIRONMENTAL POLLUTION	Article	Nanjing University of Information Science & Technology; Chinese Academy of Sciences; Research Center for Eco-Environmental Sciences (RCEES)	0269-7491	2021	10.1016/j.envpol.2020.115979
Ji, XW; Abakumov, E; Chigray, S; Saparova, S; Polyakov, V; Wang, WJ; Wu, DS; Li, CL; Huang, Y; Xie, XC	Response of carbon and microbial properties to risk elements pollution in arctic soils	JOURNAL OF HAZARDOUS MATERIALS	Article	Nanchang University; Saint Petersburg State University; University of Saskatchewan; Arctic & Antarctic Research Institute; East China Normal University; East China Normal University; Nanjing Hydraulic Research Institute; Nanjing University	0304-3894	2021	10.1016/j.jhazmat.2020.124430
Zhang, QY; Wang, QF; Zhu, JX; Xu, L; Li, MX; Rengel, Z; Xiao, JF; Hobbie, EA; Piao, SL; Luo, WT; He, NP	Higher soil acidification risk in southeastern Tibetan Plateau	SCIENCE OF THE TOTAL ENVIRONMENT	Article	Chinese Academy of Sciences; Institute of Geographic Sciences & Natural Resources Research, CAS; Chinese Academy of Sciences; University of Chinese Academy of Sciences, CAS; University of Western Australia; Institute for Adriatic Crops and Karst Reclamation Split; University System Of New Hampshire; University of New Hampshire; Peking University; Chinese Academy of Sciences; Shenyang Institute of…	0048-9697	2021	10.1016/j.scitotenv.2020.143372
Dong, CC; Wang, W; Liu, HY; Xu, XT; Chen, XY; Zeng, H	Comparison of soil microbial responses to nitrogen addition between ex-arable grassland and natural grassland	JOURNAL OF SOILS AND SEDIMENTS	Article	Peking University; Peking University; Peking University	1439-0108	2021	10.1007/s11368-021-02892-4
Yang, DL; Luo, J; Peng, PH; Li, W; Shi, WB; Jia, LY; He, YM	Dynamics of nitrogen and phosphorus accumulation and their stoichiometry along a chronosequence of forest primary succession in the Hailuogou Glacier retreat area, eastern Tibetan Plateau	PLOS ONE	Article	Chengdu University of Technology; Chinese Academy of Sciences; Institute of Mountain Hazards & Environment, CAS; Chengdu University of Technology; Chinese Academy of Sciences; University of Chinese Academy of Sciences, CAS	1932-6203	2021	10.1371/journal.pone.0246433
Liu, FQ; Zhang, YP; Liang, H; Gao, DW	Resilience of methane cycle and microbial functional genes to drought and flood in an alkaline wetland: A metagenomic analysis	CHEMOSPHERE	Article	Harbin Institute of Technology; Beijing University of Civil Engineering & Architecture	0045-6535	2021	10.1016/j.chemosphere.2020.129034
Sonti, NF; Hallett, RA; Griffin, KL; Trammell, TLE; Sullivan, JH	Chlorophyll fluorescence parameters, leaf traits and foliar chemistry of white oak and red maple trees in urban forest patches	TREE PHYSIOLOGY	Article	United States Department of Agriculture (USDA); United States Forest Service; United States Department of Agriculture (USDA); United States Forest Service; Columbia University; University of Delaware; University System of Maryland; University of Maryland College Park	0829-318X	2021	10.1093/treephys/tpaa121
Zhang, MY; Wang, WJ; Tang, L; Heenan, M; Wang, DJ; Xu, ZH	Impacts of prescribed burning on urban forest soil: Minor changes in net greenhouse gas emissions despite evident alterations of microbial community structures	APPLIED SOIL ECOLOGY	Article	Hunan Agricultural University; Griffith University; Fujian Normal University	0929-1393	2021	10.1016/j.apsoil.2020.103780
Qiu, GY; Wang, B; Li, T; Zhang, XN; Zou, ZD; Yan, CH	Estimation of the transpiration of urban shrubs using the modified three-dimensional three-temperature model and infrared remote sensing	JOURNAL OF HYDROLOGY	Article	Peking University	0022-1694	2021	10.1016/j.jhydrol.2020.125940
Brown, MA; Beasley, B; Atalay, F; Cobb, KM; Dwiveldi, P; Hubbs, J; Iwaniek, DM; Mani, S; Matisoff, D; Mohan, JE; Mullen, J; Oxman, M; Rochberg, D; Rodgers, M; Shepherd, M; Simmons, R; Taylor, L; Toktay, LB	Translating a Global Emission-Reduction Framework for Subnational Climate Action: A Case Study from the State of Georgia	ENVIRONMENTAL MANAGEMENT	Article	University System of Georgia; Georgia Institute of Technology; Emory University; Rollins School Public Health; University System of Georgia; Georgia Institute of Technology; University System of Georgia; University of Georgia; University System of Georgia; Georgia State University; University System of Georgia; University of Georgia; University System of Georgia; University of Georgia; University…	0364-152X	2021	10.1007/s00267-020-01406-1
Wen, Z; Zheng, H; Smith, JR; Ouyang, ZY	Plant functional diversity mediates indirect effects of land-use intensity on soil water conservation in the dry season of tropical areas	FOREST ECOLOGY AND MANAGEMENT	Article	Chinese Academy of Sciences; Research Center for Eco-Environmental Sciences (RCEES); Chinese Academy of Sciences; University of Chinese Academy of Sciences, CAS; Stanford University; Stanford University	0378-1127	2021	10.1016/j.foreco.2020.118646
Cambou, A; Saby, NPA; Hunault, G; Nold, F; Cannavo, P; Schwartz, C; Vidal-Beaudet, L	Impact of city historical management on soil organic carbon stocks in Paris (France)	JOURNAL OF SOILS AND SEDIMENTS	Article	Institut Agro; Montpellier SupAgro; CIRAD; Institut de Recherche pour le Developpement (IRD); INRAE; Universite de Montpellier; Institut Agro; Agrocampus Ouest; Universite de Lorraine; INRAE; INRAE; Universite d'Angers	1439-0108	2021	10.1007/s11368-020-02869-9
Soba, D; Gámez, AL; Uriz, N; de Larrinaga, LR; Gonzalez-Murua, C; Becerril, JM; Esteban, R; Serret, D; Araus, JL; Aranjuelo, I	Foliar heavy metals and stable isotope (δ13C, δ15N) profiles as reliable urban pollution biomonitoring tools	URBAN FORESTRY & URBAN GREENING	Article	Consejo Superior de Investigaciones Cientificas (CSIC); CSIC-GN-UPNA - Instituto de Agrobiotecnologia (IDAB); University of Barcelona; Centre de Recerca en Agrotecnologia (Agrotecnio); University of Basque Country	1618-8667	2021	10.1016/j.ufug.2020.126918
Mihalakakou, G; Souliotis, M; Papadaki, M; Menounou, P; Dimopoulos, P; Kolokotsa, D; Paravantis, JA; Tsangrassoulis, A; Panaras, G; Giannakopoulos, E; Papaefthimiou, S	Green roofs as a nature-based solution for improving urban sustainability: Progress and perspectives	RENEWABLE & SUSTAINABLE ENERGY REVIEWS	Article	University of Patras; University of Western Macedonia; University of Patras; University of Patras; Technical University of Crete; University of Piraeus; University of Thessaly; University of Western Macedonia; University of Patras; Technical University of Crete	1364-0321	2023	10.1016/j.rser.2023.113306
Cui, YX; Moorhead, DL; Peng, SS; Sinsabaugh, RL	New insights into the patterns of ecoenzymatic stoichiometry in soil and sediment	SOIL BIOLOGY & BIOCHEMISTRY	Article	Peking University; University System of Ohio; University of Toledo; University of New Mexico	0038-0717	2023	10.1016/j.soilbio.2022.108910
Wan, LF; Cheng, H; Liu, YQ; Shen, Y; Liu, GH; Su, XK	Global meta-analysis reveals differential effects of microplastics on soil ecosystem	SCIENCE OF THE TOTAL ENVIRONMENT	Article	Chinese Academy of Sciences; Research Center for Eco-Environmental Sciences (RCEES); Chinese Academy of Sciences; University of Chinese Academy of Sciences, CAS	0048-9697	2023	10.1016/j.scitotenv.2023.161403
Wang, KA; Hou, JJ; Zhang, SD; Hu, WJ; Yi, GW; Chen, WJ; Cheng, L; Zhang, QZ	Preparation of a new biochar-based microbial fertilizer: Nutrient release patterns and synergistic mechanisms to improve soil fertility	SCIENCE OF THE TOTAL ENVIRONMENT	Article	East China Normal University; Shanghai Institute of Technology; Ministry of Natural Resources of the People's Republic of China	0048-9697	2023	10.1016/j.scitotenv.2022.160478
Wang, JZ; Du, W; Chen, YC; Lei, YL; Chen, L; Shen, GF; Pan, B; Tao, S	Nitrated and oxygenated polycyclic aromatic hydrocarbons emissions from solid fuel combustion in rural China: Database of 12 real-world scenarios for residential cooking and heating activities	SCIENCE OF THE TOTAL ENVIRONMENT	Article	Kunming University of Science & Technology; Peking University; Zhejiang University of Technology; East China Normal University	0048-9697	2022	10.1016/j.scitotenv.2022.158501
Su, PJ; Gao, CY; Zhang, XJ; Zhang, D; Liu, XY; Xiang, TT; Luo, YF; Chu, K; Zhang, GH; Bu, NS; Li, ZL	Microplastics stimulated nitrous oxide emissions primarily through denitrification: A meta-analysis	JOURNAL OF HAZARDOUS MATERIALS	Article	Liaoning University; Ministry of Agriculture & Rural Affairs; Southwest University - China; Southwest University - China; Chinese Academy of Agricultural Sciences; Institute of Plant Protection, CAAS; Liaoning University	0304-3894	2023	10.1016/j.jhazmat.2022.130500
Zhu, SN; Yan, C; Zheng, J; Chen, C; Ning, HS; Yang, DS; Wang, M; Ma, Y; Zhan, JL; Hua, CJ; Yin, RJ; Li, YY; Liu, YC; Jiang, JK; Yao, L; Wang, L; Kulmala, M; Worsnop, DR	Observation and Source Apportionment of Atmospheric Alkaline Gases in Urban Beijing	ENVIRONMENTAL SCIENCE & TECHNOLOGY	Article	Nanjing University of Information Science & Technology; Nanjing University; Nanjing University of Information Science & Technology; Beijing University of Chemical Technology; Tsinghua University; University of Helsinki	0013-936X	2022	10.1021/acs.est.2c03584
Ding, TH; Fang, LP; Chen, JF; Ji, J; Fang, Z	Exploring the relationship between water-energy-food nexus sustainability and multiple ecosystem services at the urban agglomeration scale	SUSTAINABLE PRODUCTION AND CONSUMPTION	Article	Hohai University; Hohai University	2352-5509	2023	10.1016/j.spc.2022.10.028
Yuan, Y; Bai, ZK; Zhang, JJ; Huang, YH	Investigating the trade-offs between the supply and demand for ecosystem services for regional spatial management	JOURNAL OF ENVIRONMENTAL MANAGEMENT	Article	China University of Geosciences; Ministry of Natural Resources of the People's Republic of China; Ministry of Natural Resources of the People's Republic of China; China University of Geosciences	0301-4797	2023	10.1016/j.jenvman.2022.116591
Wei, JX; Hu, A; Gan, XY; Zhao, XD; Huang, Y	Spatial and Temporal Characteristics of Ecosystem Service Trade-Off and Synergy Relationships in the Western Sichuan Plateau, China	FORESTS	Article	Sichuan University; University of Tokyo; East China University of Science & Technology		2022	10.3390/f13111845
Zhuang, QW; Shao, ZF; Gong, JY; Li, DR; Huang, X; Zhang, Y; Xu, XD; Dang, CY; Chen, JL; Altan, O; Wu, SX	Modeling carbon storage in urban vegetation: Progress, challenges, and opportunities	INTERNATIONAL JOURNAL OF APPLIED EARTH OBSERVATION AND GEOINFORMATION	Article	Wuhan University; Wuhan University; University of Arkansas System; University of Arkansas Fayetteville; Istanbul Technical University; Chinese Academy of Sciences; Xinjiang Institute of Ecology & Geography, CAS	1569-8432	2022	10.1016/j.jag.2022.103058
Chen, XF; Wang, JC; Wang, RY; Zhang, D; Chu, SH; Yang, XJ; Hayat, K; Fan, ZQ; Cao, XD; Ok, YS; Zhou, P	Insights into growth-promoting effect of nanomaterials: Using transcriptomics and metabolomics to reveal the molecular mechanisms of MWCNTs in enhancing hyperaccumulator under heavy metal(loid)s stress	JOURNAL OF HAZARDOUS MATERIALS	Article	Shanghai Jiao Tong University; Shanghai Jiao Tong University; Shanghai Jiao Tong University; Fudan University; Shanghai Jiao Tong University; Korea University; Korea University	0304-3894	2022	10.1016/j.jhazmat.2022.129640
Fini, A; Frangi, P; Comin, S; Vigevani, I; Rettori, AA; Brunetti, C; Moura, BB; Ferrini, F	Effects of pavements on established urban trees: Growth, physiology, ecosystem services and disservices	LANDSCAPE AND URBAN PLANNING	Article	University of Milan; Consiglio Nazionale delle Ricerche (CNR); Istituto per la Protezione Sostenibile delle Piante (IPSP-CNR); University of Florence	0169-2046	2022	10.1016/j.landurbplan.2022.104501
Yang, PM; Hu, J; Hu, BF; Luo, DF; Peng, J	Estimating Soil Organic Matter Content in Desert Areas Using In Situ Hyperspectral Data and Feature Variable Selection Algorithms in Southern Xinjiang, China	REMOTE SENSING	Article	Tarim University; University of Wisconsin System; University of Wisconsin Madison; Jiangxi University of Finance & Economics		2022	10.3390/rs14205221
Zhang, XJ; Wang, GQ; Xue, BL; Yinglan, A	Changes in vegetation cover and its influencing factors in the inner Mongolia reach of the yellow river basin from 2001 to 2018	ENVIRONMENTAL RESEARCH	Article	Beijing Normal University; China Institute of Water Resources & Hydropower Research; Beijing Normal University	0013-9351	2022	10.1016/j.envres.2022.114253
Su, PJ; Wang, J; Zhang, D; Chu, K; Yao, YZ; Sun, QQ; Luo, YF; Zhang, RJ; Su, XP; Wang, ZC; Bu, NS; Li, ZL	Hierarchical and cascading changes in the functional traits of soil animals induced by microplastics: A meta-analysis	JOURNAL OF HAZARDOUS MATERIALS	Article	Liaoning University; Liaoning University; Harbin Institute of Technology; Chinese Academy of Agricultural Sciences; Institute of Plant Protection, CAAS; Southwest University - China; Ministry of Agriculture & Rural Affairs; Harbin Institute of Technology; Liaoning University	0304-3894	2022	10.1016/j.jhazmat.2022.129854
Pereira, MAG; Domingos, M; da Silva, EA; Aragaki, S; Ramon, M; de Camargo, PB; Ferreira, ML	Isotopic composition (d13C and d15N) in the soil-plant system of subtropical urban forests	SCIENCE OF THE TOTAL ENVIRONMENT	Article	Universidade Nove de Julho; Centro Universitario Adventista de Sao Paulo; Universidade Guarulhos	0048-9697	2022	10.1016/j.scitotenv.2022.158052
Casey, L; Freeman, B; Francis, K; Brychkova, G; McKeown, P; Spillane, C; Bezrukov, A; Zaworotko, M; Styles, D	Comparative environmental footprints of lettuce supplied by hydroponic controlled-environment agriculture and field-based supply chains	JOURNAL OF CLEANER PRODUCTION	Article	University of Limerick; Bangor University	0959-6526	2022	10.1016/j.jclepro.2022.133214
Chang, YP; Ding, YJ; Zhang, SQ; Qin, J; Zhao, QD	Dynamics and environmental controls of evapotranspiration for typical alpine meadow in the northeastern Tibetan Plateau	JOURNAL OF HYDROLOGY	Article	Chinese Academy of Sciences; Chinese Academy of Sciences; Chinese Academy of Sciences; University of Chinese Academy of Sciences, CAS; Northwest University Xi'an; Northwest University Xi'an	0022-1694	2022	10.1016/j.jhydrol.2022.128282
Kinsman-Costello, L; Bean, E; Goeckner, A; Matthews, JW; O'Driscoll, M; Palta, MM; Peralta, AL; Reisinger, AJ; Reyes, GJ; Smyth, AR; Stofan, M	Mud in the city: Effects of freshwater salinization on inland urban wetland nitrogen and phosphorus availability and export	LIMNOLOGY AND OCEANOGRAPHY LETTERS	Article	University System of Ohio; Kent State University; Kent State University Salem; Kent State University Kent; State University System of Florida; University of Florida; University of North Carolina; East Carolina University; Pace University; State University System of Florida; University of Florida		2023	10.1002/lol2.10273
Niu, L; Zhang, ZF; Liang, YZ; Huang, YF	Assessing the Impact of Urbanization and Eco-Environmental Quality on Regional Carbon Storage: A Multiscale Spatio-Temporal Analysis Framework	REMOTE SENSING	Article	Renmin University of China; Tianjin University		2022	10.3390/rs14164007
Bao, HY; Chen, ZQ; Wen, QX; Wu, YQ; Fu, QQ	Effect of calcium peroxide dosage on organic matter degradation, humification during sewage sludge composting and application as amendment for Cu (II)-polluted soils	JOURNAL OF HAZARDOUS MATERIALS	Article	Harbin Institute of Technology; Harbin Institute of Technology; Harbin Institute of Technology	0304-3894	2022	10.1016/j.jhazmat.2022.129592
Wei, FL; Wang, S; Fu, BJ; Wang, LH; Zhang, WM; Wang, LX; Pan, N; Fensholt, R	Divergent trends of ecosystem-scale photosynthetic efficiency between arid and humid lands across the globe	GLOBAL ECOLOGY AND BIOGEOGRAPHY	Article	Chinese Academy of Sciences; Research Center for Eco-Environmental Sciences (RCEES); University of Copenhagen; Beijing Normal University; Aarhus University; Indiana University System; Indiana University-Purdue University Indianapolis	1466-822X	2022	10.1111/geb.13561
Sifton, MA; Lim, P; Smith, SM; Thomas, SC	Interactive effects of biochar and N-fixing companion plants on growth and physiology of Acer saccharinum	URBAN FORESTRY & URBAN GREENING	Article	University of Toronto; Heinrich Heine University Dusseldorf	1618-8667	2022	10.1016/j.ufug.2022.127652
Sanchez-Pinero, J; Novo-Quiza, N; Pernas-Castano, C; Moreda-Pineiro, J; Muniategui-Lorenzo, S; Lopez-Mahia, P	Inhalation bioaccessibility of multi-class organic pollutants associated to atmospheric PM2.5: Correlation with PM2.5 properties and health risk assessment	ENVIRONMENTAL POLLUTION	Article	Universidade da Coruna	0269-7491	2022	10.1016/j.envpol.2022.119577
Li, XP; Liu, T; Li, HX; Geisen, S; Hu, F; Liu, MQ	Management effects on soil nematode abundance differ among functional groups and land-use types at a global scale	JOURNAL OF ANIMAL ECOLOGY	Article	Nanjing Agricultural University; Nanjing Agricultural University; Wageningen University & Research	0021-8790	2022	10.1111/1365-2656.13744
Xue, Y; Kang, HB; Cui, YX; Lu, S; Yang, H; Zhu, JQ; Fu, ZJ; Yan, CL; Wang, DX	Consistent Plant and Microbe Nutrient Limitation Patterns During Natural Vegetation Restoration	FRONTIERS IN PLANT SCIENCE	Article	Northwest A&F University - China; Peking University	1664-462X	2022	10.3389/fpls.2022.885984
Zou, YP; Zhang, SY; Shi, ZY; Zhou, HX; Zheng, HW; Hu, JH; Mei, J; Bai, L; Jia, JL	Effects of mixed-based biochar on water infiltration and evaporation in aeolian sand soil	JOURNAL OF ARID LAND	Article	China University of Mining & Technology	1674-6767	2022	10.1007/s40333-022-0060-6
Li, ZL; Zeng, ZQ; Song, ZP; Tian, DS; Huang, XZ; Nie, S; Wang, J; Jiang, LF; Luo, YQ; Cui, J; Niu, SL	Variance and main drivers of field nitrous oxide emissions: A global synthesis	JOURNAL OF CLEANER PRODUCTION	Article	Chinese Academy of Sciences; Institute of Geographic Sciences & Natural Resources Research, CAS; Southwest University - China; Chinese Academy of Agricultural Sciences; Institute of Plant Protection, CAAS; Southwest University - China; Northern Arizona University; Shandong Agricultural University; Chinese Academy of Sciences; University of Chinese Academy of Sciences, CAS; Peking University; Peki…	0959-6526	2022	10.1016/j.jclepro.2022.131686
Sánchez-Galván, G; Olguín, EJ; Melo, FJ; Jiménez-Moreno, D; Hernández, VJ	Pontederia sagittata and Cyperus papyrus contribution to carbon storage in floating treatment wetlands established in subtropical urban ponds	SCIENCE OF THE TOTAL ENVIRONMENT	Article	Instituto de Ecologia - Mexico	0048-9697	2022	10.1016/j.scitotenv.2022.154990
Xue, D; Wang, ZJ; Li, Y; Liu, MX; Wei, HJ	Assessment of Ecosystem Services Supply and Demand (Mis)matches for Urban Ecological Management: A Case Study in the Zhengzhou-Kaifeng-Luoyang Cities	REMOTE SENSING	Article	Henan Agricultural University; Henan Agricultural University; Zhejiang Gongshang University; Beijing Normal University		2022	10.3390/rs14071703
Schittko, C; Onandia, G; Bernard-Verdier, M; Heger, T; Jeschke, JM; Kowarik, I; Maass, S; Joshi, J	Biodiversity maintains soil multifunctionality and soil organic carbon in novel urban ecosystems	JOURNAL OF ECOLOGY	Article	University of Potsdam; Leibniz Institut fur Gewasserokologie und Binnenfischerei (IGB); Leibniz Zentrum fur Agrarlandschaftsforschung (ZALF); Free University of Berlin; Technical University of Munich; Technical University of Berlin; University of Potsdam	0022-0477	2022	10.1111/1365-2745.13852
Ran, LS; Wang, XH; Li, SL; Zhou, YY; Xu, YJ; Chan, CN; Fang, NF; Xin, ZB; Shen, HX	Integrating Aquatic and Terrestrial Carbon Fluxes to Assess the Net Landscape Carbon Balance of a Highly Erodible Semiarid Catchment	JOURNAL OF GEOPHYSICAL RESEARCH-BIOGEOSCIENCES	Article	University of Hong Kong; Peking University; Tianjin University; Chinese Academy of Sciences; Institute of Geographic Sciences & Natural Resources Research, CAS; Louisiana State University System; Louisiana State University; Chinese Academy of Sciences; Institute of Soil & Water Conservation (ISWC), CAS; Ministry of Water Resources; Beijing Forestry University	2169-8953	2022	10.1029/2021JG006765
Nassary, EK; Msomba, BH; Masele, WE; Ndaki, PM; Kahangwa, CA	Exploring urban green packages as part of Nature-based Solutions for climate change adaptation measures in rapidly growing cities of the Global South	JOURNAL OF ENVIRONMENTAL MANAGEMENT	Article	Sokoine University of Agriculture; University of Dar es Salaam	0301-4797	2022	10.1016/j.jenvman.2022.114786
Zhang, WJ; Li, TT; Tang, JY; Liu, XL; Liu, YH; Zhong, X	The profiles of chiral pesticides in peri-urban areas near Yangtze River: enantioselective distribution characteristics and correlations with surface sediments	JOURNAL OF ENVIRONMENTAL SCIENCES	Article	Hohai University	1001-0742	2022	10.1016/j.jes.2022.02.001
Zeb, B; Alam, K; Ditta, A; Ullah, S; Ali, HM; Ibrahim, M; Salem, MZM	Variation in Coarse Particulate Matter (PM10) and Its Characterization at Multiple Locations in the Semiarid Region	FRONTIERS IN ENVIRONMENTAL SCIENCE	Article	University of Peshawar; University of Western Australia; King Saud University; Government College University Faisalabad; Egyptian Knowledge Bank (EKB); Alexandria University		2022	10.3389/fenvs.2022.843582
Assennato, F; Smiraglia, D; Cavalli, A; Congedo, L; Giuliani, C; Riitano, N; Strollo, A; Munafò, M	The Impact of Urbanization on Land: A Biophysical-Based Assessment of Ecosystem Services Loss Supported by Remote Sensed Indicators	LAND	Article	Italian Institute for Environmental Protection & Research (ISPRA); Tuscia University		2022	10.3390/land11020236
Xie, ZJ; Sun, X; Lux, J; Chen, TW; Potapov, M; Wu, DH; Scheu, S	Drivers of Collembola assemblages along an altitudinal gradient in northeast China	ECOLOGY AND EVOLUTION	Article	Chinese Academy of Sciences; Northeast Institute of Geography & Agroecology, CAS; Chinese Academy of Sciences; Institute of Urban Environment, CAS; Chinese Academy of Sciences; University of Chinese Academy of Sciences, CAS; University of Gottingen; Czech Academy of Sciences; Biology Centre of the Czech Academy of Sciences; Moscow State University of Education; Northeast Normal University - China…	2045-7758	2022	10.1002/ece3.8559
Zhang, L; Yang, Z; Peng, M; Cheng, XM	Contamination Levels and the Ecological and Human Health Risks of Potentially Toxic Elements (PTEs) in Soil of Baoshan Area, Southwest China	APPLIED SCIENCES-BASEL	Article	China Geological Survey; Institute of Geophysical & Geochemical Exploration, Chinese Academy of Geological Sciences; Chinese Academy of Geological Sciences; China Geological Survey; Chinese Academy of Geological Sciences; China Geological Survey		2022	10.3390/app12031693
Tian, QX; Jiang, QH; Huang, L; Li, D; Lin, QL; Tang, ZY; Liu, F	Vertical Distribution of Soil Bacterial Communities in Different Forest Types Along an Elevation Gradient	MICROBIAL ECOLOGY	Article; Early Access	Chinese Academy of Sciences; Wuhan Botanical Garden, CAS; Chinese Academy of Sciences; Chinese Academy of Sciences; University of Chinese Academy of Sciences, CAS; Tibet University; Peking University; Peking University	0095-3628	2022	10.1007/s00248-021-01949-8
Rauch, HP; von der Thannen, M; Raymond, P; Mira, E; Evette, A	Ecological challenges for the use of soil and water bioengineering techniques in river and coastal engineering projects	ECOLOGICAL ENGINEERING	Article	University of Natural Resources & Life Sciences, Vienna; Communaute Universite Grenoble Alpes; UDICE-French Research Universities; Universite Grenoble Alpes (UGA); INRAE; INRAE; AgroParisTech; CIRAD; Centre National de la Recherche Scientifique (CNRS); Universite des Antilles	0925-8574	2022	10.1016/j.ecoleng.2021.106539
Van Metre, PC; Mahler, BJ; Qi, SL; Gellis, AC; Fuller, CC; Schmidt, TS	Sediment Sources and Sealed-Pavement Area Drive Polycyclic Aromatic Hydrocarbon and Metal Occurrence in Urban Streams	ENVIRONMENTAL SCIENCE & TECHNOLOGY	Article	United States Department of the Interior; United States Geological Survey; United States Department of the Interior; United States Geological Survey; United States Department of the Interior; United States Geological Survey; United States Department of the Interior; United States Geological Survey	0013-936X	2022	10.1021/acs.est.1c00414
Paltseva, AA; Deeb, M; Di Iorio, E; Circelli, L; Cheng, ZQ; Colombo, C	Prediction of bioaccessible lead in urban and suburban soils with Vis-NIR diffuse reflectance spectroscopy	SCIENCE OF THE TOTAL ENVIRONMENT	Article	City University of New York (CUNY) System; Brooklyn College (CUNY); City University of New York (CUNY) System; Peoples Friendship University of Russia; University of Louisiana Lafayette; University of Molise	0048-9697	2022	10.1016/j.scitotenv.2021.151107
Yang, HF; Chen, W	Spatio-temporal pattern of urban vegetation carbon sink and driving mechanisms of human activities in Huaibei, China	ENVIRONMENTAL SCIENCE AND POLLUTION RESEARCH	Article	Nanjing University; Nanjing University of Posts & Telecommunications	0944-1344	2022	10.1007/s11356-022-18512-8
Wood, KL; Kaushal, SS; Vidon, PG; Mayer, PM; Galella, JG	Tree trade-offs in stream restoration: impacts on riparian groundwater quality	URBAN ECOSYSTEMS	Article	University System of Maryland; University of Maryland College Park; University System of Maryland; University of Maryland College Park; State University of New York (SUNY) System; State University of New York (SUNY) College of Environmental Science & Forestry; United States Environmental Protection Agency	1083-8155	2022	10.1007/s11252-021-01182-8
Abdalla, M; Song, XT; Ju, XT; Smith, P	Evaluation of the DNDC Model to Estimate Soil Parameters, Crop Yield and Nitrous Oxide Emissions for Alternative Long-Term Multi-Cropping Systems in the North China Plain	AGRONOMY-BASEL	Article	University of Aberdeen; Chinese Academy of Sciences; Research Center for Eco-Environmental Sciences (RCEES); Hainan University; China Agricultural University		2022	10.3390/agronomy12010109
Hussain, M; Shah, SNA; Naeem, M; Farooq, S; Jabran, K; Alfarraj, S	Impact of different mulching treatments on weed flora and productivity of maize (Zea mays L.) and sunflower (Helianthus annuus L.)	PLOS ONE	Article	Bahauddin Zakariya University; Murdoch University; Harran University; Nigde Omer Halisdemir University; King Saud University	1932-6203	2022	10.1371/journal.pone.0266756
Ungaro, F; Maienza, A; Ugolini, F; Lanini, GM; Baronti, S; Calzolari, C	Assessment of joint soil ecosystem services supply in urban green spaces: A case study in Northern Italy	URBAN FORESTRY & URBAN GREENING	Article	Consiglio Nazionale delle Ricerche (CNR); Istituto per la BioEconomia (IBE-CNR)	1618-8667	2022	10.1016/j.ufug.2021.127455
Yi, XY; Ning, C; Feng, SL; Gao, HQ; Zhao, JL; Liao, JY; Peng, YH; Zhao, SQ; Liu, SG	Urbanization-induced environmental changes strongly affect wetland soil bacterial community composition and diversity	ENVIRONMENTAL RESEARCH LETTERS	Article	Central South University of Forestry & Technology; Central South University of Forestry & Technology; Peking University	1748-9326	2022	10.1088/1748-9326/ac444f
Yang, Y; Wang, TQ; Li, YL; Wang, ME; Chen, WP; Dai, YT	Mitigating cadmium contamination of rice soils supporting tobacco-rice rotation in southern China: Win-win or lose-lose?	JOURNAL OF HAZARDOUS MATERIALS	Article	Chinese Academy of Sciences; Research Center for Eco-Environmental Sciences (RCEES)	0304-3894	2022	10.1016/j.jhazmat.2021.128052
Aneseyee, AB; Soromessa, T; Elias, E; Noszczyk, T; Hernik, J; Benti, NE	Expressing carbon storage in economic terms: The case of the upper Omo Gibe Basin in Ethiopia	SCIENCE OF THE TOTAL ENVIRONMENT	Article	Addis Ababa University; Agricultural University Krakow	0048-9697	2022	10.1016/j.scitotenv.2021.152166
Zhou, YF; Li, JG; Pu, LJ	Quantifying ecosystem service mismatches for land use planning: spatial-temporal characteristics and novel approach-a case study in Jiangsu Province, China	ENVIRONMENTAL SCIENCE AND POLLUTION RESEARCH	Article	Nanjing University; Ministry of Natural Resources of the People's Republic of China; Jiangsu Normal University; Nanjing Institute of Technology	0944-1344	2022	10.1007/s11356-021-17764-0
Whittinghill, L; Sarr, S	Practices and Barriers to Sustainable Urban Agriculture: A Case Study of Louisville, Kentucky	URBAN SCIENCE	Article	Kentucky State University; Connecticut Agricultural Experiment Station; University of Louisville		2021	10.3390/urbansci5040092
Li, SJ; Yuan, XY; Feng, ZZ; Du, YD; Agathokleous, E; Paoletti, E	Whole-plant compensatory responses of isoprene emission from hybrid poplar seedlings exposed to elevated ozone	SCIENCE OF THE TOTAL ENVIRONMENT	Article	Nanjing University of Information Science & Technology; Nanjing University of Information Science & Technology; Chinese Academy of Sciences; Research Center for Eco-Environmental Sciences (RCEES); Consiglio Nazionale delle Ricerche (CNR)	0048-9697	2022	10.1016/j.scitotenv.2021.150949
Zheng, NG; Yu, YX; Li, YY; Ge, CR; Chapman, SJ; Yao, HY	Can aged biochar offset soil greenhouse gas emissions from crop residue amendments in saline and non-saline soils under laboratory conditions?	SCIENCE OF THE TOTAL ENVIRONMENT	Article	Wuhan Institute of Technology; Chinese Academy of Sciences; Institute of Urban Environment, CAS; Chinese Academy of Sciences; James Hutton Institute	0048-9697	2022	10.1016/j.scitotenv.2021.151256
Li, JS; Zhao, YQ; Shao, XQ; Huang, D; Shang, JY; Li, H; He, YX; Liu, KS	The Mixed Addition of Biochar and Nitrogen Improves Soil Properties and Microbial Structure of Moderate-Severe Degraded Alpine Grassland in Qinghai-Tibet Plateau	FRONTIERS IN PLANT SCIENCE	Article	China Agricultural University; Chengdu University of Technology; China Agricultural University; Chinese Academy of Sciences	1664-462X	2021	10.3389/fpls.2021.765041
Weng, JY; Zhang, PX; Gao, LR; Zhu, S; Liu, Y; Qiao, L; Zhao, B; Liu, Y; Xu, M; Zheng, MH	Concentrations, homolog profiles, and risk assessment of short- and medium-chain chlorinated paraffins in soil around factories in a non-ferrous metal recycling park*	ENVIRONMENTAL POLLUTION	Article	Chinese Academy of Sciences; University of Chinese Academy of Sciences, CAS; Chinese Academy of Sciences; Research Center for Eco-Environmental Sciences (RCEES)	0269-7491	2022	10.1016/j.envpol.2021.118456
You, YM; Chu, SH; Chi, YW; Chen, XF; Wang, JC; Hayat, K; Yang, XJ; Müller, C; Zhang, D; Zhou, P	How bacteria remediate soil nitrate for sustainable crop production	JOURNAL OF CLEANER PRODUCTION	Article	Shanghai Jiao Tong University; Shanghai Jiao Tong University; Shanghai Jiao Tong University; Justus Liebig University Giessen; University College Dublin; University College Dublin	0959-6526	2021	10.1016/j.jclepro.2021.129600
Adeyemi, A; Molnar, P; Boman, J; Wichmann, J	Source apportionment of fine atmospheric particles using positive matrix factorization in Pretoria, South Africa	ENVIRONMENTAL MONITORING AND ASSESSMENT	Article	University of Pretoria; Sahlgrenska University Hospital; University of Gothenburg	0167-6369	2021	10.1007/s10661-021-09483-3
Kleyer, M	Enhancing landscape planning: Vegetation-mediated ecosystem services predicted by plant traits	LANDSCAPE AND URBAN PLANNING	Article	Carl von Ossietzky Universitat Oldenburg	0169-2046	2021	10.1016/j.landurbplan.2021.104220
Sun, YF; Feng, YH; Wang, YP; Zhao, X; Yang, YH; Tang, ZY; Wang, SP; Su, HJ; Zhu, JL; Chang, JF; Fang, JY	Field-Based Estimation of Net Primary Productivity and Its Above- and Belowground Partitioning in Global Grasslands	JOURNAL OF GEOPHYSICAL RESEARCH-BIOGEOSCIENCES	Article	Peking University; Chinese Academy of Sciences; Institute of Botany, CAS; Zhejiang University	2169-8953	2021	10.1029/2021JG006472
Wang, F; Yuan, XZ; Zhou, LL; Liu, SS; Zhang, MJ; Zhang, D	Detecting the Complex Relationships and Driving Mechanisms of Key Ecosystem Services in the Central Urban Area Chongqing Municipality, China	REMOTE SENSING	Article	Chongqing University; Chongqing University; Chongqing University; Chongqing Jiaotong University		2021	10.3390/rs13214248
Han, MG; Feng, JG; Chen, Y; Sun, LJ; Fu, LC; Zhu, BA	Mycorrhizal mycelial respiration: A substantial component of soil respired CO2	SOIL BIOLOGY & BIOCHEMISTRY	Article	Peking University; Peking University	0038-0717	2021	10.1016/j.soilbio.2021.108454
Zhou, W; Sun, XY; Li, SY; Du, TT; Zheng, Y; Fan, ZH	Effects of organic mulching on soil aggregate stability and aggregate binding agents in an urban forest in Beijing, China	JOURNAL OF FORESTRY RESEARCH	Article	Beijing Forestry University	1007-662X	2022	10.1007/s11676-021-01402-z
Tian, JQ; Liu, LF; Chen, H; Zhong, L; Zhou, XQ; Jiang, L; Zhan, W; Wang, YF	Aerobic environments in combination with substrate additions to soil significantly reshape depth-dependent microbial distribution patterns in Zoige peatlands, China	APPLIED SOIL ECOLOGY	Article	Chinese Academy of Sciences; Institute of Botany, CAS; Chinese Academy of Sciences; Institute of Microbiology, CAS; Chinese Academy of Sciences; Chengdu Institute of Biology, CAS; Chinese Academy of Sciences; Chengdu Institute of Biology, CAS; Chinese Academy of Sciences; Tianjin University; East China Normal University; Northwest A&F University - China; Chinese Academy of Sciences; University of…	0929-1393	2022	10.1016/j.apsoil.2021.104252
O'Riordan, R; Davies, J; Stevens, C; Quinton, JN	The effects of sealing on urban soil carbon and nutrients	SOIL	Article	Lancaster University; Lancaster University	2199-3971	2021	10.5194/soil-7-661-2021
Fiard, M; Cuny, P; Sylvi, L; Hubas, C; Jézéquel, R; Lamy, D; Walcker, R; El Houssainy, A; Heimbürger-Boavida, LE; Robinet, T; Bihannic, I; Gilbert, F; Michaud, E; Dirberg, G; Militon, C	Mangrove microbiota along the urban-to-rural gradient of the Cayenne estuary (French Guiana, South America): Drivers and potential bioindicators	SCIENCE OF THE TOTAL ENVIRONMENT	Article	Centre National de la Recherche Scientifique (CNRS); UDICE-French Research Universities; Aix-Marseille Universite; Institut de Recherche pour le Developpement (IRD); UDICE-French Research Universities; Sorbonne Universite; Centre National de la Recherche Scientifique (CNRS); Institut de Recherche pour le Developpement (IRD); Museum National d'Histoire Naturelle (MNHN); Institut de Recherche pour …	0048-9697	2022	10.1016/j.scitotenv.2021.150667
Wang, H	Regional assessment of ecological risk caused by human activities on wetlands in the Muleng-Xingkai Plain of China using a pressure-capital-vulnerability-response model	WETLANDS ECOLOGY AND MANAGEMENT	Article	Nanning Normal University	0923-4861	2022	10.1007/s11273-021-09838-0
Li, Y; Li, HW; Jin, CY; Wang, ZG; Hao, J; Li, YQ; Liu, JL	Multi-scale investigation and mechanism analysis on Young's modulus of C-S-H modified by multi-walled carbon nanotubes	CONSTRUCTION AND BUILDING MATERIALS	Article	Beijing University of Technology; Beijing University of Technology; Inner Mongolia University; Beijing Forestry University	0950-0618	2021	10.1016/j.conbuildmat.2021.125079
Prakash, J; Choudhary, S; Raliya, R; Chadha, TS; Fang, JX; Biswas, P	Real-time source apportionment of fine particle inorganic and organic constituents at an urban site in Delhi city: An IoT-based approach	ATMOSPHERIC POLLUTION RESEARCH	Article	Washington University (WUSTL); University of Miami	1309-1042	2021	10.1016/j.apr.2021.101206
Downey, AE; Groffman, PM; Mejía, GA; Cook, EM; Sritrairat, S; Karty, R; Palmer, MI; McPhearson, T	Soil carbon sequestration in urban afforestation sites in New York City	URBAN FORESTRY & URBAN GREENING	Article	City University of New York (CUNY) System; Brooklyn College (CUNY); City University of New York (CUNY) System; City University of New York (CUNY) System; The New School; Columbia University; Cary Institute of Ecosystem Studies; Stockholm University	1618-8667	2021	10.1016/j.ufug.2021.127342
Droz, AG; Coffman, RR; Fulton, TG; Blackwood, CB	Moving beyond habitat analogs: Optimizing green roofs for a balance of ecosystem services	ECOLOGICAL ENGINEERING	Article	University System of Ohio; Kent State University; Kent State University Kent; Kent State University Salem; University System of Ohio; Kent State University; Kent State University Kent; Kent State University Salem	0925-8574	2021	10.1016/j.ecoleng.2021.106422
Hoang, SA; Lamb, D; Sarkar, B; Seshadri, B; Yu, RMK; Tran, TKA; O'Connor, J; Rinklebe, J; Kirkham, MB; Vo, HT; Bolan, NS	Phosphorus application enhances alkane hydroxylase gene abundance in the rhizosphere of wild plants grown in petroleum-hydrocarbon-contaminated soil	ENVIRONMENTAL RESEARCH	Article	University of Newcastle; University of Newcastle; Royal Melbourne Institute of Technology (RMIT); Lancaster University; University of Newcastle; University of Wuppertal; Sejong University; Kansas State University; University of Western Australia; University of Western Australia	0013-9351	2022	10.1016/j.envres.2021.111924
Bae, J; Ryu, Y	The magnitude and causes of edge effects on soil organic carbon stocks within and across urban to rural forest patches	LANDSCAPE AND URBAN PLANNING	Article	Seoul National University (SNU); Seoul National University (SNU); Seoul National University (SNU)	0169-2046	2021	10.1016/j.landurbplan.2021.104223
Wang, LN; Yu, EY; Li, S; Fu, X; Wu, G	Analysis of Ecosystem Service Trade-Offs and Synergies in Ulansuhai Basin	SUSTAINABILITY	Article	Chinese Academy of Sciences; Research Center for Eco-Environmental Sciences (RCEES); Chinese Academy of Sciences; University of Chinese Academy of Sciences, CAS		2021	10.3390/su13179839
Nag, R; O'Rourke, SM; Cummins, E	A GIS study to rank Irish agricultural lands with background and anthropogenic concentrations of metal(loid)s in soil	CHEMOSPHERE	Article	University College Dublin	0045-6535	2022	10.1016/j.chemosphere.2021.131928
Hechmi, S; Hamdi, H; Mokni-Tlili, S; Zoghlami, RI; Khelil, MN; Jellali, S; Benzarti, S; Jedidi, N	Variation of soil properties with sampling depth in two different light-textured soils after repeated applications of urban sewage sludge	JOURNAL OF ENVIRONMENTAL MANAGEMENT	Article	Centre de Recherche et des Technologies des Eaux de Borj Cedria; Universite de Carthage; Qatar University; Institut des Regions Arides; Universite de Gabes; Sultan Qaboos University	0301-4797	2021	10.1016/j.jenvman.2021.113355
Bonetti, G; Trevathan-Tackett, SM; Hebert, N; Carnell, PE; Macreadie, PI	Microbial community dynamics behind major release of methane in constructed wetlands	APPLIED SOIL ECOLOGY	Article	Deakin University	0929-1393	2021	10.1016/j.apsoil.2021.104163
Toan, NS; Tan, XF; Phuong, NTD; Aron, NSM; Chew, KW; Khoo, KS; Thu, TTN; Lim, DT; Dong, PD; Ang, WL; Show, PL	Advanced green bioprocess of soil carbohydrate extraction from long-term conversion of forest soil to paddy field	JOURNAL OF ENVIRONMENTAL CHEMICAL ENGINEERING	Article	University of Danang; Heilongjiang Institute of Technology; Harbin Institute of Technology; University of Nottingham Malaysia; Xiamen University Malaysia Campus; Vietnam Academy of Science & Technology (VAST); National University of Civil Engineering; Universiti Kebangsaan Malaysia	2213-2929	2021	10.1016/j.jece.2021.106021
Kozak, C; Leithold, J; do Prado, LL; Knapik, HG; Azevedo, JCD; Braga, SM; Fernandes, CVS	Adaptive monitoring approach to assess dissolved organic matter dynamics during rainfall events	ENVIRONMENTAL MONITORING AND ASSESSMENT	Article	Universidade Federal do Parana; Universidade Federal do Parana; Universidade Tecnologica Federal do Parana	0167-6369	2021	10.1007/s10661-021-09183-y
Polyakov, V; Nizamutdinov, T; Abakumov, E; Morgun, E	Soil Diversity and Key Functional Characteristics of Yakutsk City: Largest Urbanized Cryogenic World's Ecosystem	ENERGIES	Article	Saint Petersburg State University; Arctic & Antarctic Research Institute		2021	10.3390/en14133819
Kotze, DJ; Ghosh, S; Hui, N; Jumpponen, A; Lee, BPYH; Lu, CY; Lum, S; Pouyat, R; Szlavecz, K; Wardle, DA; Yesilonis, I; Zheng, BX; Setälä, H	Urbanization minimizes the effects of plant traits on soil provisioned ecosystem services across climatic regions	GLOBAL CHANGE BIOLOGY	Article	University of Helsinki; Shanghai Jiao Tong University; Kansas State University; Nanyang Technological University & National Institute of Education (NIE) Singapore; Nanyang Technological University; University of Delaware; Johns Hopkins University; United States Department of Agriculture (USDA); United States Forest Service	1354-1013	2021	10.1111/gcb.15717
Ho, L; Jerves-Cobo, R; Forio, MAE; Mouton, A; Nopens, I; Goethals, P	Integrated mechanistic and data-driven modeling for risk assessment of greenhouse gas production in an urbanized river system	JOURNAL OF ENVIRONMENTAL MANAGEMENT	Article	Ghent University; Universidad de Cuenca; Ghent University	0301-4797	2021	10.1016/j.jenvman.2021.112999
Premarathne, C; Jiang, ZJ; He, JL; Fang, Y; Chen, QM; Cui, LJ; Wu, YC; Liu, SL; Zhao, CY; Vijerathna, P; Huang, XP	Low Light Availability Reduces the Subsurface Sediment Carbon Content in Halophila beccarii From the South China Sea	FRONTIERS IN PLANT SCIENCE	Article	Chinese Academy of Sciences; South China Sea Institute of Oceanology, CAS; Chinese Academy of Sciences; University of Chinese Academy of Sciences, CAS; Southern Marine Science & Engineering Guangdong Laboratory; Southern Marine Science & Engineering Guangdong Laboratory (Guangzhou); Chinese Academy of Sciences; Dezhou University; University of Colombo	1664-462X	2021	10.3389/fpls.2021.664060
Duan, SW; Kaushal, SS; Rosenfeldt, EJ; Huang, JL; Murthy, S	Changes in concentrations and source of nitrogen along the Potomac River with watershed land use	APPLIED GEOCHEMISTRY	Article	University System of Maryland; University of Maryland College Park; University System of Maryland; University of Maryland College Park; Xiamen University	0883-2927	2021	10.1016/j.apgeochem.2021.105006
Tian, P; Li, JL; Cao, LD; Pu, RL; Gong, HB; Zhang, HT; Chen, HL; Yang, XD	Assessing Matching Characteristics and Spatial Differences between Supply and Demand of Ecosystem Services: A Case Study in Hangzhou, China	LAND	Article	Ningbo University; Ningbo University; State University System of Florida; University of South Florida; Ningbo University		2021	10.3390/land10060582
Yang, XY; Bao, N; Li, WW; Liu, SJ; Fu, YH; Mao, YC	Soil Nutrient Estimation and Mapping in Farmland Based on UAV Imaging Spectrometry	SENSORS	Article	Northeastern University - China; Arizona State University; Arizona State University-Tempe; Northeastern University - China		2021	10.3390/s21113919
Huang, YS; Li, P; An, Q; Mao, FJ; Zhai, WC; Yu, KF; He, YL	Long-term land use/cover changes reduce soil erosion in an ionic rare-earth mineral area of southern China	LAND DEGRADATION & DEVELOPMENT	Article	Shanghai Jiao Tong University; Chongqing University; National University of Singapore; Shanghai Jiao Tong University	1085-3278	2021	10.1002/ldr.3890
Law, QD; Trappe, JM; Braun, RC; Patton, AJ	Greenhouse gas fluxes from turfgrass systems: Species, growth rate, clipping management, and environmental effects	JOURNAL OF ENVIRONMENTAL QUALITY	Article	Purdue University System; Purdue University West Lafayette Campus; Purdue University	0047-2425	2021	10.1002/jeq2.20222
Peng, JL; Xu, YS; Shang, B; Agathokleous, E; Feng, ZZ	Effects of elevated ozone on maize under varying soil nitrogen levels: Biomass, nitrogen and carbon, and their allocation to kernel	SCIENCE OF THE TOTAL ENVIRONMENT	Article	Nanjing University of Information Science & Technology; Chinese Academy of Sciences; Research Center for Eco-Environmental Sciences (RCEES); Chinese Academy of Sciences; University of Chinese Academy of Sciences, CAS	0048-9697	2021	10.1016/j.scitotenv.2020.144332
Wang, C; Liu, S; Wang, PF; Chen, J; Wang, X; Yuan, QS; Ma, JJ	How sediment bacterial community shifts along the urban river located in mining city	ENVIRONMENTAL SCIENCE AND POLLUTION RESEARCH	Article	Hohai University	0944-1344	2021	10.1007/s11356-020-12031-0
Ozgul, M; Dindaroglu, T	Multi-criteria analysis for mapping of environmentally sensitive areas in a karst ecosystem	ENVIRONMENT DEVELOPMENT AND SUSTAINABILITY	Article	Ataturk University; Kahramanmaras Sutcu Imam University	1387-585X	2021	10.1007/s10668-021-01363-7
Suárez, JC; Polanía, JA; Anzola, JA; Contreras, AT; Méndez, DL; Vanegas, JI; Noriega, JE; Rodríguez, L; Urban, MO; Beebe, S; Rao, IM	Influence of nitrogen supply on gas exchange, chlorophyll fluorescence and grain yield of breeding lines of common bean evaluated in the Amazon region of Colombia	ACTA PHYSIOLOGIAE PLANTARUM	Article	Universidad Nacional Autonoma de Mexico; Alliance; International Center for Tropical Agriculture - CIAT; United States Department of Agriculture (USDA)	0137-5881	2021	10.1007/s11738-021-03233-1
Wang, FH; Chen, SM; Qin, SP; Sun, RB; Zhang, YM; Wang, SQ; Hu, CS; Hu, HW; Liu, BB	Long-term nitrogen fertilization alters microbial community structure and denitrifier abundance in the deep vadose zone	JOURNAL OF SOILS AND SEDIMENTS	Article	Chinese Academy of Sciences; Institute of Genetics & Developmental Biology, CAS; Chinese Academy of Sciences; Research Center for Eco-Environmental Sciences (RCEES); Chinese Academy of Sciences; University of Chinese Academy of Sciences, CAS; Fujian Agriculture & Forestry University; University of Melbourne	1439-0108	2021	10.1007/s11368-021-02931-0
Gao, J; Zhou, MY; Shao, JJ; Zhou, GY; Liu, RQ; Zhou, LY; Liu, HY; He, YH; Chen, Y; Zhou, XH	Fine root trait-function relationships affected by mycorrhizal type and climate	GEODERMA	Article	East China Normal University	0016-7061	2021	10.1016/j.geoderma.2021.115011
Raj, A; Jhariya, MK	Site quality and vegetation biomass in the tropical Sal mixed deciduous forest of Central India	LANDSCAPE AND ECOLOGICAL ENGINEERING	Article	Lovely Professional University; Sant Gahira Guru Vishwavidyalaya, Sarguja	1860-1871	2021	10.1007/s11355-021-00450-1
Chang, L; Sun, X; Wang, BF; Gao, MX; Chen, L; Liang, AZ; Wu, DH	Green more than brown food resources drive the effect of simulated climate change on Collembola: A soil transplantation experiment in Northeast China	GEODERMA	Article	Chinese Academy of Sciences; Northeast Institute of Geography & Agroecology, CAS; Chinese Academy of Sciences; Institute of Urban Environment, CAS; Jilin Academy of Agricultural Sciences; Ningbo University; Sichuan University; Texas Tech University System; Texas Tech University; Northeast Normal University - China	0016-7061	2021	10.1016/j.geoderma.2021.115008
Lan, Y; Tham, J; Jia, SG; Sarkar, S; Fan, WH; Reid, JS; Ong, CN; Yu, LYE	Peat-forest burning smoke in Maritime Continent: Impacts on receptor PM2.5 and implications at emission sources	ENVIRONMENTAL POLLUTION	Article	National University of Singapore; National University of Singapore; United States Department of Defense; United States Navy; Naval Research Laboratory; National University of Singapore; Sun Yat Sen University; Indian Institute of Technology System (IIT System); Indian Institute of Technology (IIT) - Mandi	0269-7491	2021	10.1016/j.envpol.2021.116626
Thienelt, TS; Anderson, DE	Estimates of energy partitioning, evapotranspiration, and net ecosystem exchange of CO2 for an urban lawn and a tallgrass prairie in the Denver metropolitan area under contrasting conditions	URBAN ECOSYSTEMS	Article	Martin Luther University Halle Wittenberg; United States Department of the Interior; United States Geological Survey	1083-8155	2021	10.1007/s11252-021-01108-4
Kiss, TBW; Chen, XH; Ponting, J; Sizmur, T; Hodson, ME	Dual stresses of flooding and agricultural land use reduce earthworm populations more than the individual stressors	SCIENCE OF THE TOTAL ENVIRONMENT	Article	University of York - UK; University of Leeds; University of Reading	0048-9697	2021	10.1016/j.scitotenv.2020.142102
Zhu, YK; Shen, HH; Feng, YP; Li, H; Akinyemi, DS; Hu, HF; Fang, JY	Effects of shrub encroachment on soil aggregates and organic carbon vary in different grasslands in Inner Mongolia, China	ECOSPHERE	Article	Chinese Academy of Sciences; Institute of Botany, CAS; Chinese Academy of Sciences; University of Chinese Academy of Sciences, CAS; Peking University	2150-8925	2021	10.1002/ecs2.3363
Dmuchowski, W; Baczewska-Dabrowska, A; Gozdowski, D; Bragoszewska, P; Gworek, B; Suwara, I; Chojnacki, T; Józwiak, A; Swiezewska, E	Effect of salt stress in urban conditions on two Acer species with different sensitivity	PEERJ	Article	Institute of Environmental Protection - National Research Institute; Polish Academy of Sciences; Warsaw University of Life Sciences; Polish Academy of Sciences; Institute of Biochemistry & Biophysics - Polish Academy of Sciences	2167-8359	2021	10.7717/peerj.10577
Sun, LJ; Ataka, M; Kominami, Y; Yoshimura, K; Kitayama, K	A constant microbial C/N ratio mediates the microbial nitrogen mineralization induced by root exudation among four co-existing canopy species	RHIZOSPHERE	Article	Peking University; Kyoto University; Forestry & Forest Products Research Institute - Japan; Forestry & Forest Products Research Institute - Japan; Yamagata University		2021	10.1016/j.rhisph.2021.100317
Kalev, S; Duan, SW; Toor, GS	Enriched dissolved organic carbon export from a residential stormwater pond	SCIENCE OF THE TOTAL ENVIRONMENT	Article	State University System of Florida; University of Florida; University System of Maryland; University of Maryland College Park	0048-9697	2021	10.1016/j.scitotenv.2020.141773
Paradelo, R; Herbón, C; Barral, MT	Composition and chemical properties of the soils of the city of Santiago de Compostela, northwestern Spain	JOURNAL OF ENVIRONMENTAL QUALITY	Article; Proceedings Paper	Universidade de Santiago de Compostela	0047-2425	2021	10.1002/jeq2.20094
Wang, XH; Li, SYN; Zhu, B; Homyak, PM; Chen, GS; Yao, XD; Wu, DM; Yang, ZJ; Lyu, M; Yang, YS	Long-term nitrogen deposition inhibits soil priming effects by enhancing phosphorus limitation in a subtropical forest	GLOBAL CHANGE BIOLOGY	Article	Fujian Normal University; Peking University; Peking University; University of California System; University of California Riverside; Fujian Normal University	1354-1013	2023	10.1111/gcb.16718
Chakraborty, P; Wood, DA; Singh, S; Hazra, B	Trace element contamination in soils surrounding the open-cast coal mines of eastern Raniganj basin, India	ENVIRONMENTAL GEOCHEMISTRY AND HEALTH	Article	Council of Scientific & Industrial Research (CSIR) - India; CSIR - Central Institute of Mining & Fuel Research (CIMFR); Academy of Scientific & Innovative Research (AcSIR)	0269-4042	2023	10.1007/s10653-023-01556-1
Amalina, F; Krishnan, S; Zularisam, AW; Nasrullah, M	Recent advancement and applications of biochar technology as a multifunctional component towards sustainable environment	ENVIRONMENTAL DEVELOPMENT	Article	Universiti Malaysia Pahang Al-Sultan Abdullah (UMPSA); Prince of Songkla University	2211-4645	2023	10.1016/j.envdev.2023.100819
Qiao, Q; Zhen, ZL; Liu, LM; Luo, PP	The Construction of Ecological Security Pattern under Rapid Urbanization in the Loess Plateau: A Case Study of Taiyuan City	REMOTE SENSING	Article	Shanxi Agricultural University; Hunan University; Chang'an University; Chang'an University; Chang'an University		2023	10.3390/rs15061523
Liu, J; Meng, X; Xie, JH; Liu, B; Tang, B; Wang, RY; Wang, C; Gu, P; Song, YD; Huo, SC; Zou, JL	Dual Active Sites Engineering on Sea Urchin-Like CoNiS Hollow Nanosphere for Stabilizing Oxygen Electrocatalysis via a Template-Free Vulcanization Strategy	ADVANCED FUNCTIONAL MATERIALS	Article	Heilongjiang University; Kunming University of Science & Technology; Guangdong University of Technology	1616-301X	2023	10.1002/adfm.202300579
Potapov, AM; Guerra, CA; van den Hoogen, J; Babenko, A; Bellini, BC; Berg, MP; Chown, SL; Deharveng, L; Kovác, L; Kuznetsova, NA; Ponge, JF; Potapov, MB; Russell, DJ; Alexandre, D; Alatalo, JM; Arbea, JI; Bandyopadhyaya, I; Bernava, V; Bokhorst, S; Bolger, T; Castaño-Meneses, G; Chauvat, M; Chen, TW; Chomel, M; Classen, AT; Cortet, J; Cuchta, P; Manuela de la Pedrosa, A; Ferreira, SSD; Fiera, C; …	Globally invariant metabolism but density-diversity mismatch in springtails	NATURE COMMUNICATIONS	Article	University of Gottingen; Russian Academy of Sciences; Saratov Scientific Center of the Russian Academy of Sciences; Severtsov Institute of Ecology & Evolution; Leipzig University; Swiss Federal Institutes of Technology Domain; ETH Zurich; Universidade Federal do Rio Grande do Norte; Vrije Universiteit Amsterdam; University of Groningen; Monash University; UDICE-French Research Universities; Sorbo…		2023	10.1038/s41467-023-36216-6
Yang, H; Munson, SM; Huntingford, C; Carvalhais, N; Knapp, AK; Li, XY; Peñuelas, J; Zscheischler, J; Chen, AP	The detection and attribution of extreme reductions in vegetation growth across the global land surface	GLOBAL CHANGE BIOLOGY	Article	Max Planck Society; Peking University; United States Department of the Interior; United States Geological Survey; UK Centre for Ecology & Hydrology (UKCEH); Universidade Nova de Lisboa; Colorado State University; Colorado State University; University of Barcelona; Centro de Investigacion Ecologica y Aplicaciones Forestales (CREAF-CERCA); Consejo Superior de Investigaciones Cientificas (CSIC); Cen…	1354-1013	2023	10.1111/gcb.16595
Ding, TH; Chen, JF; Fang, LP; Ji, J; Fang, Z	Urban ecosystem services supply-demand assessment from the perspective of the water-energy-food nexus	SUSTAINABLE CITIES AND SOCIETY	Article	Hohai University; Hohai University	2210-6707	2023	10.1016/j.scs.2023.104401
Li, CW; Fang, SB; Geng, XL; Yuan, Y; Zheng, XW; Zhang, D; Li, RX; Sun, W; Wang, XR	Coastal ecosystem service in response to past and future land use and land cover change dynamics in the Yangtze river estuary	JOURNAL OF CLEANER PRODUCTION	Article	Fudan University	0959-6526	2023	10.1016/j.jclepro.2022.135601
Ju, WL; Moorhead, DL; Shen, GT; Cui, YX; Fang, LC	Soil aggregate development and associated microbial metabolic limitations alter grassland carbon storage following livestock removal	SOIL BIOLOGY & BIOCHEMISTRY	Article	Wuhan University of Technology; Ministry of Water Resources; Chinese Academy of Sciences; Institute of Soil & Water Conservation (ISWC), CAS; Tsinghua University; University System of Ohio; University of Toledo; Helmholtz Association; Helmholtz Center for Environmental Research (UFZ); Peking University; Chinese Academy of Sciences; Wuhan University of Technology	0038-0717	2023	10.1016/j.soilbio.2022.108907
Azzi, ES; Karltun, E; Sundberg, C	Life cycle assessment of urban uses of biochar and case study in Uppsala, Sweden	BIOCHAR	Article	Royal Institute of Technology; Swedish University of Agricultural Sciences; Swedish University of Agricultural Sciences	2524-7972	2022	10.1007/s42773-022-00144-3
Maroof, L; Khan, I; Hassan, H; Azam, S; Khan, W	Microbial degradation of low density polyethylene by Exiguobacterium sp. strain LM-IK2 isolated from plastic dumped soil	WORLD JOURNAL OF MICROBIOLOGY & BIOTECHNOLOGY	Article	University of Peshawar; Tsinghua University; Tsinghua University	0959-3993	2022	10.1007/s11274-022-03389-z
He, X; Wang, YY; Tai, MH; Lin, A; Owyong, S; Li, X; Leong, K; Yusof, MLM; Ghosh, S; Wang, CH	Integrated applications of water hyacinth biochar: A circular economy case study	JOURNAL OF CLEANER PRODUCTION	Article	National University of Singapore; National University of Singapore; University of New England	0959-6526	2022	10.1016/j.jclepro.2022.134621
Ehlers, TA; Chen, DL; Appel, E; Bolch, T; Chen, FH; Diekmann, B; Dippold, MA; Giese, M; Guggenberger, G; Lai, HW; Li, X; Liu, JG; Liu, YQ; Ma, YM; Miehe, G; Mosbrugger, V; Mulch, A; Piao, SL; Schwalb, A; Thompson, LG; Su, ZB; Sun, H; Yao, TD; Yang, XX; Yang, K; Zhu, LP	Past, present, and future geo-biosphere interactions on the Tibetan Plateau and implications for permafrost	EARTH-SCIENCE REVIEWS	Article	Eberhard Karls University of Tubingen; University of Gothenburg; University of St Andrews; Chinese Academy of Sciences; Institute of Tibetan Plateau Research, CAS; Helmholtz Association; Alfred Wegener Institute, Helmholtz Centre for Polar & Marine Research; Leibniz University Hannover; Chinese Academy of Sciences; Institute of Tibetan Plateau Research, CAS; Southern University of Science & Techn…	0012-8252	2022	10.1016/j.earscirev.2022.104197
Li, Y; Li, MD; Zheng, ZC; Shen, W; Li, YA; Rong, PJ; Qin, YC	Trends in drought and effects on carbon sequestration over the Chinese mainland	SCIENCE OF THE TOTAL ENVIRONMENT	Article	Henan University; Henan University; Henan University; Henan University; Henan University of Economics & Law	0048-9697	2023	10.1016/j.scitotenv.2022.159075
Junginger, T; Payraudeau, S; Imfeld, G	Transformation and stable isotope fractionation of the urban biocide terbutryn during biodegradation, photodegradation and abiotic hydrolysis	CHEMOSPHERE	Article	UDICE-French Research Universities; Universites de Strasbourg Etablissements Associes; Universite de Strasbourg	0045-6535	2022	10.1016/j.chemosphere.2022.135329
Tan, XF; Zhang, CF; Wei, HZ; Shi, P; Chang, HX; Ho, SH	Versatile strategy of sulfanilamide antibiotics removal via microalgal biochar: Role of oxygen-enriched functional groups	CHEMOSPHERE	Article	Heilongjiang Institute of Technology; Harbin Institute of Technology; Chinese Academy of Sciences; Dalian Institute of Chemical Physics, CAS; Chongqing University of Technology	0045-6535	2022	10.1016/j.chemosphere.2022.135244
Wang, Y; Xie, MD; Hu, BF; Jiang, QS; Shi, Z; He, YF; Peng, J	Desert Soil Salinity Inversion Models Based on Field In Situ Spectroscopy in Southern Xinjiang, China	REMOTE SENSING	Article	Tarim University; Gansu Agricultural University; Jiangxi University of Finance & Economics; Zhejiang University; Tarim University; Zhejiang University; China Geological Survey		2022	10.3390/rs14194962
Munirwan, RP; Taib, AM; Taha, MR; Abd Rahman, N; Munirwansyah, M	Utilization of coffee husk ash for soil stabilization: A systematic review	PHYSICS AND CHEMISTRY OF THE EARTH	Article	Universiti Kebangsaan Malaysia; Universiti Kebangsaan Malaysia; Universitas Syiah Kuala	1474-7065	2022	10.1016/j.pce.2022.103252
Zhou, J; Li, ZP; Shi, LL; Kuzyakov, Y; Pausch, J	Microbial utilization of photosynthesized carbon depends on land-use	GEODERMA	Article	China Agricultural University; Chinese Academy of Sciences; Institute of Urban Environment, CAS; University of Gottingen; Chinese Academy of Sciences; Kunming Institute of Botany, CAS; Chinese Academy of Sciences; Eberhard Karls University of Tubingen; University of Gottingen; University of Bayreuth; Peoples Friendship University of Russia	0016-7061	2022	10.1016/j.geoderma.2022.116160
Harjung, A; Schweichhart, J; Rasch, G; Griebler, C	Large-scale study on groundwater dissolved organic matter reveals a strong heterogeneity and a complex microbial footprint	SCIENCE OF THE TOTAL ENVIRONMENT	Article	University of Vienna; Czech Academy of Sciences; Biology Centre of the Czech Academy of Sciences	0048-9697	2023	10.1016/j.scitotenv.2022.158542
Liang, HB; Xue, YY; Li, ZS; Gao, GY; Liu, GH	Afforestation may accelerate the depletion of deep soil moisture on the Loess Plateau: Evidence from a meta-analysis	LAND DEGRADATION & DEVELOPMENT	Article	Taiyuan Normal University; Chinese Academy of Sciences; Research Center for Eco-Environmental Sciences (RCEES); Chinese Academy of Sciences; University of Chinese Academy of Sciences, CAS; Xinjiang University	1085-3278	2022	10.1002/ldr.4426
Manga, M; Evans, BE; Ngasala, TM; Camargo-Valero, MA	Recycling of Faecal Sludge: Nitrogen, Carbon and Organic Matter Transformation during Co-Composting of Faecal Sludge with Different Bulking Agents	INTERNATIONAL JOURNAL OF ENVIRONMENTAL RESEARCH AND PUBLIC HEALTH	Article	University of North Carolina; University of North Carolina Chapel Hill; University of Leeds; Makerere University; Michigan State University; Universidad Nacional de Colombia		2022	10.3390/ijerph191710592
He, X; Ling, CCY; Sun, ZY; Xu, XY; Li, SFY; Wang, XA; Tan, HTW; Yusof, MLM; Ghosh, S; Wang, CH	Sustainable management of water hyacinth via gasification: Economic, environmental, and toxicity assessments	JOURNAL OF CLEANER PRODUCTION	Article	National University of Singapore; National University of Singapore; National University of Singapore; University of New England	0959-6526	2022	10.1016/j.jclepro.2022.133725
Zhang, B; Jiao, WT	Biochar facilitated bacterial reduction of Cr(VI) by Shewanella Putrefaciens CN32: Pathways and surface characteristics	ENVIRONMENTAL RESEARCH	Article	Chinese Academy of Sciences; Research Center for Eco-Environmental Sciences (RCEES); Chinese Academy of Sciences; Research Center for Eco-Environmental Sciences (RCEES)	0013-9351	2022	10.1016/j.envres.2022.113971
Zhao, DM; Wang, JZ; Miao, J; Zhen, JN; Wang, JJ; Gao, CJ; Jiang, JC; Wu, GF	Spectral features of Fe and organic carbon in estimating low and moderate concentration of heavy metals in mangrove sediments across different regions and habitat types	GEODERMA	Article	Shenzhen University; Shenzhen University; Shenzhen University; Shenzhen University; Shenzhen University; Chinese Academy of Sciences; Shenzhen Institute of Advanced Technology, CAS; Shenzhen Polytechnic University	0016-7061	2022	10.1016/j.geoderma.2022.116093
Bhuiyan, MAH; Karmaker, SC; Saha, BB	Nexus between potentially toxic elements accumulation and seasonal/anthropogenic influences on mangrove sediments and ecological risk in Sundarbans, Bangladesh: An approach from GIS, self-organizing map, conditional inference tree and random forest models	ENVIRONMENTAL POLLUTION	Article	Kyushu University; Kyushu University; Jahangirnagar University; University of Dhaka	0269-7491	2022	10.1016/j.envpol.2022.119765
Wang, QM; Yang, K; Li, LX; Zhu, YH	Assessing the Terrain Gradient Effect of Landscape Ecological Risk in the Dianchi Lake Basin of China Using Geo-Information Tupu Method	INTERNATIONAL JOURNAL OF ENVIRONMENTAL RESEARCH AND PUBLIC HEALTH	Article	Yunnan Normal University; Yunnan Normal University		2022	10.3390/ijerph19159634
Yu, QS; Ma, SH; Ni, XF; Ni, XL; Guo, ZM; Tan, XP; Zhong, MY; Abu Hanif, M; Zhu, JL; Ji, CJ; Zhu, B; Fang, JY	Long-term phosphorus addition inhibits phosphorus transformations involved in soil arbuscular mycorrhizal fungi and acid phosphatase in two tropical rainforests	GEODERMA	Article	Peking University; Peking University; Chinese Academy of Sciences; Chinese Academy of Sciences; South China Botanical Garden, CAS	0016-7061	2022	10.1016/j.geoderma.2022.116076
Zhao, B; Ballantyne, AP; Meng, SW; Zhao, G; Zheng, ZT; Zhu, JT; Cao, J; Zhang, YJ; Zhao, XH	Understory plant removal counteracts tree thinning effect on soil respiration in a temperate forest	GLOBAL CHANGE BIOLOGY	Article	Chinese Academy of Sciences; Institute of Geographic Sciences & Natural Resources Research, CAS; University of Montana System; University of Montana; Peking University; Peking University; Beijing Forestry University	1354-1013	2022	10.1111/gcb.16337
Helman, D; Yungstein, Y; Mulero, G; Michael, Y	High-Throughput Remote Sensing of Vertical Green Living Walls (VGWs) in Workplaces	REMOTE SENSING	Article	Hebrew University of Jerusalem; Hebrew University of Jerusalem		2022	10.3390/rs14143485
Wang, JY; He, LY; Xu, XF; Ren, CJ; Wang, J; Guo, YX; Zhao, FZ	Linkage between microbial functional genes and net N mineralisation in forest soils along an elevational gradient	EUROPEAN JOURNAL OF SOIL SCIENCE	Article	Northwest University Xi'an; Northwest University Xi'an; California State University System; San Diego State University; Northwest A&F University - China; Ministry of Water Resources; Chinese Academy of Sciences; Institute of Soil & Water Conservation (ISWC), CAS; Northwest University Xi'an	1351-0754	2022	10.1111/ejss.13276
Wang, JF; Li, LF; Li, Q; Wang, S; Liu, XL; Li, Y	The Spatiotemporal Evolution and Prediction of Carbon Storage in the Yellow River Basin Based on the Major Function-Oriented Zone Planning	SUSTAINABILITY	Article	Shanxi Normal University; Hebei Academy of Sciences		2022	10.3390/su14137963
Li, YX; Sun, LJ; Zhu, B	Trade-offs among fine-root phosphorus-acquisition strategies of 15 tropical woody species	FOREST ECOSYSTEMS	Article	Peking University; Peking University	2095-6355	2022	10.1016/j.fecs.2022.100055
Zhou, P; Zhao, DX; Liu, X; Duo, LH; He, BJ	Dynamic Change of Vegetation Index and Its Influencing Factors in Alxa League in the Arid Area	FRONTIERS IN ECOLOGY AND EVOLUTION	Article	Henan Polytechnic University; Chinese Academy of Sciences; University of Queensland; South China University of Technology; University of Hong Kong; South China University of Technology; South China University of Technology; East China University of Technology; East China University of Technology; Ministry of Natural Resources of the People's Republic of China; Chongqing University; Chongqing Univ…	2296-701X	2022	10.3389/fevo.2022.922739
Zhang, B; Chen, HZ; Deng, MQ; Li, JY; Gonzalez, AL; Wang, SP	High dimensionality of stoichiometric niches in soil fauna	ECOLOGY	Article	Peking University; Rutgers State University Camden; Rutgers State University New Brunswick; Rutgers State University New Brunswick; Rutgers State University Camden	0012-9658	2022	10.1002/ecy.3741
Dong, LZ; Yao, XD; Deng, YY; Zhang, HJ; Zeng, WJ; Li, XY; Tang, JJ; Wang, W	Nitrogen deficiency in soil mediates multifunctionality responses to global climatic drivers	SCIENCE OF THE TOTAL ENVIRONMENT	Article	Peking University; Peking University; Peking University; Fujian Normal University; Chinese Academy of Sciences; Institute of Geographic Sciences & Natural Resources Research, CAS; Peking University	0048-9697	2022	10.1016/j.scitotenv.2022.156533
Ullah, R; Khan, N; Hewitt, N; Ali, K; Jones, DA; Khan, MEH	Invasive Species as Rivals: Invasive Potential and Distribution Pattern of Xanthium strumarium L.	SUSTAINABILITY	Article	University of Malakand; University of British Columbia		2022	10.3390/su14127141
Yan, X; Han, HJ; Qiu, J; Zhang, L; Xia, YQ; Yan, XY	Suburban agriculture increased N levels but decreased indirect N2O emissions in an agricultural-urban gradient river	WATER RESEARCH	Article	Chinese Academy of Sciences; Institute of Soil Science, CAS; Chinese Academy of Sciences; University of Chinese Academy of Sciences, CAS	0043-1354	2022	10.1016/j.watres.2022.118639
Rodgers, TFM; Wu, LP; Gu, XY; Spraakman, S; Passeport, E; Diamond, ML	Stormwater Bioretention Cells Are Not an Effective Treatment forPersistent and Mobile Organic Compounds (PMOCs)	ENVIRONMENTAL SCIENCE & TECHNOLOGY	Article	University of Toronto; University of British Columbia; University of Toronto; University of Toronto; University of Toronto	0013-936X	2022	10.1021/acs.est.1c07555
Chen, YC; Wu, RX; Zhang, L; Ling, J; Yu, WF; Shen, GF; Du, W; Zhao, MR	High spatial resolved cropland coverage and cultivation category determine neonicotinoid distribution in agricultural soil at the provincial scale	JOURNAL OF HAZARDOUS MATERIALS	Article	Zhejiang University of Technology; Peking University; Kunming University of Science & Technology; East China Normal University	0304-3894	2022	10.1016/j.jhazmat.2022.128476
Almeida, SM; Faria, T; Martins, V; Canha, N; Diapouli, E; Eleftheriadis, K; Manousakas, MI	Source apportionment of children daily exposure to particulate matter	SCIENCE OF THE TOTAL ENVIRONMENT	Article	Universidade de Lisboa; Instituto Superior Tecnico; National Centre of Scientific Research Demokritos; Swiss Federal Institutes of Technology Domain; Paul Scherrer Institute	0048-9697	2022	10.1016/j.scitotenv.2022.155349
Li, HY; Li, YH; Yang, MH; Chen, SC; Shi, Z	Strategies for efficient estimation of soil organic content at the local scale based on a national spectral database	LAND DEGRADATION & DEVELOPMENT	Article	Jiangxi University of Finance & Economics; Zhejiang University	1085-3278	2022	10.1002/ldr.4223
Gao, DW; Wang, WJ; Gao, WF; Zeng, QB; Liang, H	Greenhouse gas fluxes response to autumn freeze-thaw period in continuous permafrost region of Daxing'an Mountains, Northeast China	ENVIRONMENTAL SCIENCE AND POLLUTION RESEARCH	Article	Beijing University of Civil Engineering & Architecture; Beijing University of Civil Engineering & Architecture; Northeast Normal University - China; Harbin Institute of Technology	0944-1344	2022	10.1007/s11356-022-20371-2
Fu, W; Chen, BD; Jansa, J; Wu, HH; Ma, W; Luo, WT; Xu, C; Hao, ZP; Wu, H; Yu, Q; Han, XG	Contrasting community responses of root and soil dwelling fungi to extreme drought in a temperate grassland	SOIL BIOLOGY & BIOCHEMISTRY	Article	Chinese Academy of Sciences; Research Center for Eco-Environmental Sciences (RCEES); Chinese Academy of Sciences; University of Chinese Academy of Sciences, CAS; Czech Academy of Sciences; Institute of Microbiology of the Czech Academy of Sciences; Chinese Academy of Agricultural Sciences; Institute of Agricultural Resources & Regional Planning, CAAS; Ministry of Agriculture & Rural Affairs; Chin…	0038-0717	2022	10.1016/j.soilbio.2022.108670
Duan, PP; Wang, DB; Xiao, KC; Zheng, L; Chen, H; Wang, KL; Li, DJ	Responses of Soil Nitrous Oxide Emission to Nitrogen Addition at Two Topographic Positions of a Subtropical Forest	JOURNAL OF GEOPHYSICAL RESEARCH-BIOGEOSCIENCES	Article	Chinese Academy of Sciences; Institute of Subtropical Agriculture, CAS; Chinese Academy of Sciences; Institute of Subtropical Agriculture, CAS; Yulin Normal University; Shaoyang University; Sun Yat Sen University	2169-8953	2022	10.1029/2021JG006539
Yao, WB; Huang, L; Yang, ZH; Zhao, FP	Effects of organic acids on heavy metal release or immobilization in contaminated soil	TRANSACTIONS OF NONFERROUS METALS SOCIETY OF CHINA	Article	Central South University; Guangzhou University	1003-6326	2022	10.1016/S1003-6326(22)65873-4
Baldini, C; Marasas, ME; Tittonell, P; Drozd, AA	Urban, periurban and horticultural landscapes-Conflict and sustainable planning in La Plata district, Argentina	LAND USE POLICY	Article	National University of La Plata; Consejo Nacional de Investigaciones Cientificas y Tecnicas (CONICET); Instituto Nacional de Tecnologia Agropecuaria (INTA); CIRAD; Universite de Montpellier; University of Groningen; National University of La Plata; National University of Cordoba; National University of Cordoba	0264-8377	2022	10.1016/j.landusepol.2022.106120
Vega-Garcia, P; Lok, CSC; Marhoon, A; Schwerd, R; Johann, S; Helmreich, B	Modelling the environmental fate and behavior of biocides used in facades covered with mortars and plasters and their transformation products	BUILDING AND ENVIRONMENT	Article	Fraunhofer Gesellschaft; Technical University of Munich	0360-1323	2022	10.1016/j.buildenv.2022.108991
Goeckner, AH; Lusk, MG; Reisinger, AJ; Hosen, JD; Smoak, JM	Florida's urban stormwater ponds are net sources of carbon to the atmosphere despite increased carbon burial over time	COMMUNICATIONS EARTH & ENVIRONMENT	Article	State University System of Florida; University of Florida; State University System of Florida; University of Florida; Purdue University System; Purdue University; State University System of Florida; University of South Florida		2022	10.1038/s43247-022-00384-y
Li, P; Yin, RB; Zhou, HM; Xu, S; Feng, ZZ	Functional traits of poplar leaves and fine roots responses to ozone pollution under soil nitrogen addition	JOURNAL OF ENVIRONMENTAL SCIENCES	Article	Beijing Forestry University; Chinese Academy of Sciences; Research Center for Eco-Environmental Sciences (RCEES); Chinese Academy of Sciences; Shenyang Institute of Applied Ecology, CAS; Nanjing University of Information Science & Technology	1001-0742	2022	10.1016/j.jes.2021.06.006
Petrova, S; Nikolov, B; Velcheva, I; Angelov, N; Valcheva, E; Katova, A; Golubinova, I; Marinov-Serafimov, P	Buffer Green Patches around Urban Road Network as a Tool for Sustainable Soil Management	LAND	Article	Plovdiv University; Agrarian University; Agricultural Academy - Bulgaria		2022	10.3390/land11030343
Wang, Y; Hong, Y; Tian, YL; Tian, GQ; Zhang, JH; Wu, HW; Bai, Y; Qian, JM	Changes in bacterial community composition and soil properties altered the response of soil respiration to rain addition in desert biological soil crusts	GEODERMA	Article	Inner Mongolia Normal University; Northwest University Xi'an; Inner Mongolia University; Chinese Academy of Sciences; Nanjing Institute of Geography & Limnology, CAS; Lanzhou University; Chinese Academy of Sciences; Institute of Genetics & Developmental Biology, CAS	0016-7061	2022	10.1016/j.geoderma.2021.115635
Wang, GH; Liu, F; Tariq, M; Wan, J; Liang, WY; Zhang, W; Peng, C; Yang, J	A comparative study on various indicators for evaluating soil health of three biochar materials application	JOURNAL OF CLEANER PRODUCTION	Article	East China University of Science & Technology; Chinese Academy of Sciences; Suzhou Institute of Nano-Tech & Nano-Bionics, CAS	0959-6526	2022	10.1016/j.jclepro.2022.131085
Xiao, ZX; Yang, LZ; Chen, C; Chen, D; Zhou, X	Redox reaction between solid-phase humins and Fe(III) compounds: Toward a further understanding of the redox properties of humin and its possible environmental effects	JOURNAL OF ENVIRONMENTAL MANAGEMENT	Article	Nanjing Tech University; Jilin Agricultural University	0301-4797	2022	10.1016/j.jenvman.2022.114793
Rincon, G; Quintana, GM; Gonzalez, A; Buitrago, Y; Gonzalez, JC; Molina, C; Jones, B	PM2.5 exceedances and source appointment as inputs for an early warning system	ENVIRONMENTAL GEOCHEMISTRY AND HEALTH	Article	Escuela Superior Politecnica del Litoral; Escuela Superior Politecnica del Litoral; University of Nottingham; Simon Bolivar University; Pontificia Universidad Catolica de Chile	0269-4042	2022	10.1007/s10653-021-01189-2
Xue, WC; Pangara, C; Aung, AM; Yu, S; Tabucanon, AS; Hong, B; Kurniawan, TA	Spatial changes of nutrients and metallic contaminants in topsoil with multi-geostatistical approaches in a large-size watershed	SCIENCE OF THE TOTAL ENVIRONMENT	Article	Asian Institute of Technology; Chinese Academy of Sciences; Institute of Urban Environment, CAS; Mahidol University; Xiamen University	0048-9697	2022	10.1016/j.scitotenv.2022.153888
Chen, H; Jiang, AZ; Huang, JJ; Li, H; McBean, E; Singh, VP; Zhang, JW; Lan, ZQ; Gao, JJ; Zhou, ZQ	An enhanced shuttleworth-wallace model for simulation of evapotranspiration and its components	AGRICULTURAL AND FOREST METEOROLOGY	Article	Nankai University; University of Guelph; Texas A&M University System; Texas A&M University College Station; United Arab Emirates University	0168-1923	2022	10.1016/j.agrformet.2021.108769
Deng, Y; Wu, DH; Wang, XH; Xie, ZQ	Responding time scales of vegetation production to extreme droughts over China	ECOLOGICAL INDICATORS	Article	Chinese Academy of Sciences; Institute of Botany, CAS; Cornell University; Peking University	1470-160X	2022	10.1016/j.ecolind.2022.108630
Fan, KK; Holland-Moritz, H; Walsh, C; Guo, XS; Wang, DZ; Bai, Y; Zhu, YG; Fierer, N; Chu, HY	Identification of the rhizosphere microbes that actively consume plant-derived carbon	SOIL BIOLOGY & BIOCHEMISTRY	Article	Chinese Academy of Sciences; Institute of Soil Science, CAS; Chinese Academy of Sciences; University of Chinese Academy of Sciences, CAS; University of Colorado System; University of Colorado Boulder; University of Colorado System; University of Colorado Boulder; Anhui Academy of Agricultural Sciences; Chinese Academy of Sciences; Institute of Genetics & Developmental Biology, CAS; Chinese Academ…	0038-0717	2022	10.1016/j.soilbio.2022.108577
Gong, WJ; Yang, Y; Chang, HQ; Wang, TY; Liang, H	Evaluating the performance of flow-electrode capacitive deionization for cadmium removal from aqueous solution	JOURNAL OF WATER PROCESS ENGINEERING	Article	Northeast Agricultural University - China; Sichuan University; Chinese Academy of Sciences; Research Center for Eco-Environmental Sciences (RCEES); Harbin Institute of Technology	2214-7144	2022	10.1016/j.jwpe.2022.102595
Zhang, J; Li, J; Ma, LL; He, XH; Liu, ZF; Wang, FM; Chu, GW; Tang, XL	Accumulation of glomalin-related soil protein benefits soil carbon sequestration: Tropical coastal forest restoration experiences	LAND DEGRADATION & DEVELOPMENT	Article	Chinese Academy of Sciences; South China Botanical Garden, CAS; Hong Kong Branch of the Southern Marine Science & Engineering Guangdong Laboratory (Guangzhou); Chinese Academy of Sciences; Institute of Urban Environment, CAS; Chinese Academy of Sciences; University of Chinese Academy of Sciences, CAS; University of California System; University of California Davis	1085-3278	2022	10.1002/ldr.4192
Glasius, M; Thomsen, D; Wang, K; Iversen, LS; Duan, J; Huang, RJ	Chemical characteristics and sources of organosulfates, organosulfonates, and carboxylic acids in aerosols in urban Xi'an, Northwest China	SCIENCE OF THE TOTAL ENVIRONMENT	Article	Aarhus University; Chinese Academy of Sciences; Chinese Academy of Sciences; Institute of Earth Environment, CAS; China Agricultural University	0048-9697	2022	10.1016/j.scitotenv.2021.151187
Moskovchenko, D; Pozhitkov, R; Ukarkhanova, D	Geochemistry of street dust in Tyumen, Russia: influence of traffic load	ENVIRONMENTAL SCIENCE AND POLLUTION RESEARCH	Article	Russian Academy of Sciences; Tyumen State University	0944-1344	2022	10.1007/s11356-021-18013-0
Yan, SC; Wu, Y; Fan, JL; Zhang, FC; Zheng, J; Guo, JJ; Lu, JS; Wu, LF; Qiang, SC; Xiang, YZ	Source-sink relationship and yield stability of two maize cultivars in response to water and fertilizer inputs in northwest China	AGRICULTURAL WATER MANAGEMENT	Article	Lanzhou University; Northwest A&F University - China; Lanzhou University of Technology; Nanchang Institute Technology; Shanxi Agricultural University	0378-3774	2022	10.1016/j.agwat.2021.107332
Reyes, TH; Scartazza, A; Bretzel, F; Di Baccio, D; Guglielminetti, L; Pini, R; Calfapietra, C	Urban conditions affect soil characteristics and physiological performance of three evergreen woody species	PLANT PHYSIOLOGY AND BIOCHEMISTRY	Article	University of Pisa; Consiglio Nazionale delle Ricerche (CNR); Istituto di Ricerca sugli Ecosistemi Terrestri (IRET); Consiglio Nazionale delle Ricerche (CNR); Istituto di Ricerca sugli Ecosistemi Terrestri (IRET)	0981-9428	2022	10.1016/j.plaphy.2021.12.030
Epelde, L; Mendizabal, M; Gutiérrez, L; Artetxe, A; Garbisu, C; Feliu, E	Quantification of the environmental effectiveness of nature-based solutions for increasing the resilience of cities under climate change	URBAN FORESTRY & URBAN GREENING	Article		1618-8667	2022	10.1016/j.ufug.2021.127433
Liu, JW; Li, H; Harvey, J; Zhang, HJ; Tian, Y	Application of Biochar on the runoff purification performance of porous asphalt pavement	TRANSPORTATION SAFETY AND ENVIRONMENT	Article	Tongji University; University of California System; University of California Davis		2021	10.1093/tse/tdab026
Sarkar, A; Deb, S; Ghosh, S; Mandal, S; Quazi, SA; Kushwaha, A; Hoque, A; Choudhury, A	Impact of anthropogenic pollution on soil properties in and around a town in Eastern India	GEODERMA REGIONAL	Article	University of New England	2352-0094	2022	10.1016/j.geodrs.2021.e00462
Agyeman, PC; John, K; Kebonye, NM; Boruvka, L; Vasat, R; Drábek, O	A geostatistical approach to estimating source apportionment in urban and peri-urban soils using the Czech Republic as an example	SCIENTIFIC REPORTS	Article	Czech University of Life Sciences Prague	2045-2322	2021	10.1038/s41598-021-02968-8
Hall, NC; Sikaroodi, M; Hogan, D; Jones, RC; Gillevet, PM	The Presence of Denitrifiers In Bacterial Communities of Urban Stormwater Best Management Practices (BMPs)	ENVIRONMENTAL MANAGEMENT	Article	United States Department of the Interior; United States Geological Survey; George Mason University; United States Department of the Interior; United States Geological Survey; George Mason University	0364-152X	2022	10.1007/s00267-021-01529-z
Suarez, JC; Urban, MO; Contreras, AT; Noriega, JE; Deva, C; Beebe, SE; Polania, JA; Casanoves, F; Rao, IM	Water Use, Leaf Cooling and Carbon Assimilation Efficiency of Heat Resistant Common Beans Evaluated in Western Amazonia	FRONTIERS IN PLANT SCIENCE	Article	Alliance; International Center for Tropical Agriculture - CIAT; University of Leeds; Universidad Nacional Autonoma de Mexico	1664-462X	2021	10.3389/fpls.2021.644010
Liu, L; Barberán, A; Gao, C; Zhang, ZC; Wang, M; Wurzburger, N; Wang, X; Zhang, R; Li, JX; Zhang, J	Impact of urbanization on soil microbial diversity and composition in the megacity of Shanghai	LAND DEGRADATION & DEVELOPMENT	Article	East China Normal University; East China Normal University; Hainan University; University of Arizona; University of California System; University of California Berkeley; University System of Georgia; University of Georgia; Shanghai Jiao Tong University	1085-3278	2022	10.1002/ldr.4145
Zhang, T; Zhuang, XM; Ahmad, S; Lee, T; Cao, CB; Ni, SQ	Investigation of dissimilatory nitrate reduction to ammonium (DNRA) in urban river network along the Huangpu River, China: rates, abundances, and microbial communities	ENVIRONMENTAL SCIENCE AND POLLUTION RESEARCH	Article	Shandong University; Shandong University; Shandong University; Yantai University; Pusan National University	0944-1344	2022	10.1007/s11356-021-17475-6
Wang, YC; Zhao, GS	A joint use of life cycle assessment and emergy analysis for sustainability evaluation of an intensive agro-system in China	ENVIRONMENT DEVELOPMENT AND SUSTAINABILITY	Article	China Agricultural University	1387-585X	2022	10.1007/s10668-021-01929-5
Zhang, QF; Zhou, JC; Li, XJ; Zheng, Y; Xie, L; Yang, ZJ; Liu, XF; Xu, C; Lin, HY; Yuan, XC; Liu, CC; Zhu, BA; Chen, YM; Yang, YS	Contrasting effects of warming and N deposition on soil microbial functional genes in a subtropical forest	GEODERMA	Article	Fujian Normal University; Fujian Normal University; Peking University; Peking University; National Ilan University; Fujian Normal University	0016-7061	2022	10.1016/j.geoderma.2021.115588
Grinshpan, M; Turkeltaub, T; Furman, A; Raveh, E; Weisbrod, N	On the use of orchards to support soil aquifer treatment systems	AGRICULTURAL WATER MANAGEMENT	Article	Ben Gurion University; Technion Israel Institute of Technology	0378-3774	2022	10.1016/j.agwat.2021.107315
Jin, BJ; Bi, QF; Li, KJ; Yu, QG; Ni, L; Lin, XY; Zhu, YG	Long-term combined application of chemical fertilizers and organic manure shapes the gut microbial diversity and functional community structures of earthworms	APPLIED SOIL ECOLOGY	Article	Zhejiang University; Chinese Academy of Sciences; Institute of Urban Environment, CAS; Zhejiang Academy of Agricultural Sciences; Zhejiang University	0929-1393	2022	10.1016/j.apsoil.2021.104250
Korneykova, MV; Vasenev, VI; Nikitin, DA; Soshina, AS; Dolgikh, AV; Sotnikova, YL	Urbanization Affects Soil Microbiome Profile Distribution in the Russian Arctic Region	INTERNATIONAL JOURNAL OF ENVIRONMENTAL RESEARCH AND PUBLIC HEALTH	Article	Peoples Friendship University of Russia; Russian Academy of Sciences; Kola Science Centre of the Russian Academy of Sciences; Institute of North Industrial Ecology Problems, Kola Science Centre of the Russian Academy of Sciences; Wageningen University & Research; Dokuchaev Soil Science Institute; Russian Academy of Sciences; Russian Academy of Sciences; Institute of Geography, Russian Academy of …		2021	10.3390/ijerph182111665
Otieno, MA; Gitari, HI; Danga, B; Karuma, AN	Soil Properties and Fertility Management with Respect to Capsicum (Capsicum annuum L.) Production in Nairobi Peri-urban Counties	JOURNAL OF SOIL SCIENCE AND PLANT NUTRITION	Article	Kenyatta University; University of Nairobi	0718-9508	2022	10.1007/s42729-021-00655-1
Serrani, D; Ajmone-Marsan, F; Corti, G; Cocco, S; Cardelli, V; Adamo, P	Heavy metal load and effects on biochemical properties in urban soils of a medium-sized city, Ancona, Italy	ENVIRONMENTAL GEOCHEMISTRY AND HEALTH	Article	Marche Polytechnic University; University of Turin; University of Naples Federico II	0269-4042	2022	10.1007/s10653-021-01105-8
Rijal, S; Rimal, B; Acharya, RP; Stork, NE	Land use/land cover change and ecosystem services in the Bagmati River Basin, Nepal	ENVIRONMENTAL MONITORING AND ASSESSMENT	Article	Prince of Songkla University; Tribhuvan University; University of Southern Queensland; Griffith University	0167-6369	2021	10.1007/s10661-021-09441-z
Shi, H; Tian, HQ; Pan, NQ; Reyer, CPO; Ciais, P; Chang, JF; Forrest, M; Frieler, K; Fu, BJ; Gädeke, A; Hickler, T; Ito, A; Ostberg, S; Pan, SF; Stevanovic, M; Yang, J	Saturation of Global Terrestrial Carbon Sink Under a High Warming Scenario	GLOBAL BIOGEOCHEMICAL CYCLES	Article	Auburn University System; Auburn University; Chinese Academy of Sciences; Research Center for Eco-Environmental Sciences (RCEES); Potsdam Institut fur Klimafolgenforschung; UDICE-French Research Universities; Universite Paris Cite; Universite Paris Saclay; CEA; Centre National de la Recherche Scientifique (CNRS); Senckenberg Gesellschaft fur Naturforschung (SGN); Senckenberg Biodiversitat & Klima…	0886-6236	2021	10.1029/2020GB006800
Chen, D; Wei, W; Chen, LD	Effects of terracing on soil properties in three key mountainous regions of China	GEOGRAPHY AND SUSTAINABILITY	Article	Chinese Academy of Sciences; Research Center for Eco-Environmental Sciences (RCEES); Chinese Academy of Sciences; University of Chinese Academy of Sciences, CAS	2096-7438	2021	10.1016/j.geosus.2021.08.002
Gheyret, G; Zhang, HT; Guo, YP; Liu, TY; Bai, YH; Li, S; Schmid, B; Bruelheide, H; Ma, KP; Tang, ZY	Radial growth response of trees to seasonal soil humidity in a subtropical forest	BASIC AND APPLIED ECOLOGY	Article	Peking University; Peking University; Chinese Academy of Sciences; Institute of Botany, CAS; University of Zurich; Martin Luther University Halle Wittenberg	1439-1791	2021	10.1016/j.baae.2021.02.015
Pavlovic, D; Pavlovic, M; Perovic, V; Mataruga, Z; Cakmak, D; Mitrovic, M; Pavlovic, P	Chemical Fractionation, Environmental, and Human Health Risk Assessment of Potentially Toxic Elements in Soil of Industrialised Urban Areas in Serbia	INTERNATIONAL JOURNAL OF ENVIRONMENTAL RESEARCH AND PUBLIC HEALTH	Article	University of Belgrade		2021	10.3390/ijerph18179412
Song, M; Kim, M; Oh, SH; Park, C; Kim, M; Kim, M; Lee, H; Choe, S; Bae, MS	Influences of Organic Volatile Compounds on the Secondary Organic Carbon of Fine Particulate Matter in the Fruit Tree Area	APPLIED SCIENCES-BASEL	Article	Mokpo National University; National Institute of Agricultural Sciences		2021	10.3390/app11178193
Zymnis, DM; Whittle, AJ	Geotechnical considerations in the design of borehole heat exchangers	CANADIAN GEOTECHNICAL JOURNAL	Article	Massachusetts Institute of Technology (MIT)	0008-3674	2021	10.1139/cgj-2020-0118
Marull, J; Padró, R; Cirera, J; Giocoli, A; Pons, M; Tello, E	A socioecological integrated analysis of the Barcelona metropolitan agricultural landscapes	ECOSYSTEM SERVICES	Article	Autonomous University of Barcelona; University of Barcelona	2212-0416	2021	10.1016/j.ecoser.2021.101350
Bi, QF; Jin, BJ; Zhu, D; Jiang, YG; Zheng, BX; O'Connor, P; Yang, XR; Richter, A; Lin, XY; Zhu, YG	How can fertilization regimes and durations shape earthworm gut microbiota in a long-term field experiment?	ECOTOXICOLOGY AND ENVIRONMENTAL SAFETY	Article	Zhejiang University; Chinese Academy of Sciences; Institute of Urban Environment, CAS; University of Vienna; Chinese Academy of Sciences; Research Center for Eco-Environmental Sciences (RCEES); University of Helsinki; University of Adelaide	0147-6513	2021	10.1016/j.ecoenv.2021.112643
Cai, W; Li, Y; Hu, J; Cheng, HM	Exploring the Microbial Ecological Functions in Response to Vertical Gradients in a Polluted Urban River	CLEAN-SOIL AIR WATER	Article	Yangzhou University; Hohai University	1863-0650	2021	10.1002/clen.202100004
Li, PY; Shi, TM; Bing, LF; Wang, ZT; Xi, FM	Calculation method and model of carbon sequestration by urban buildings: An example from Shenyang	JOURNAL OF CLEANER PRODUCTION	Article	Shenyang Jianzhu University; Shenyang Jianzhu University; Chinese Academy of Sciences; Shenyang Institute of Applied Ecology, CAS	0959-6526	2021	10.1016/j.jclepro.2021.128450
Pang, YW; Huang, YX; He, L; Zhou, YY; Sui, J; Xu, JF	Remote sensing phenology of two Chinese northern Sphagnum bogs under climate drivers during 2001 and 2018	ECOLOGICAL INDICATORS	Article	Hangzhou Normal University; University of Helsinki	1470-160X	2021	10.1016/j.ecolind.2021.107968
Yao, YZ; Tian, HQ; Kalin, L; Pan, SF; Friedrichs, MAM; Wang, J; Li, Y	Contrasting stream water temperature responses to global change in the Mid-Atlantic Region of the United States: A process-based modeling study	JOURNAL OF HYDROLOGY	Article	Auburn University System; Auburn University; William & Mary; Virginia Institute of Marine Science; Chinese Academy of Sciences; Research Center for Eco-Environmental Sciences (RCEES); Chinese Academy of Sciences; Chinese Academy of Sciences; University of Chinese Academy of Sciences, CAS	0022-1694	2021	10.1016/j.jhydrol.2021.126633
Hu, C; Xu, JP; Liu, C; Chen, Y; Yang, D; Huang, WJ; Deng, LC; Liu, SD; Griffis, TJ; Lee, XH	Anthropogenic and natural controls on atmospheric δ13C-CO2 variations in the Yangtze River delta: insights from a carbon isotope modeling framework	ATMOSPHERIC CHEMISTRY AND PHYSICS	Article	Nanjing Forestry University; Nanjing University of Information Science & Technology; China Meteorological Administration; East China University of Technology; University of Minnesota System; University of Minnesota Twin Cities; Yale University	1680-7316	2021	10.5194/acp-21-10015-2021
Kuittinen, M; Hautamäki, R; Tuhkanen, EM; Riikonen, A; Ariluoma, M	Environmental Product Declarations for plants and soils: how to quantify carbon uptake in landscape design and construction?	INTERNATIONAL JOURNAL OF LIFE CYCLE ASSESSMENT	Article	Aalto University; Natural Resources Institute Finland (Luke); University of Helsinki	0948-3349	2021	10.1007/s11367-021-01926-w
Wigand, C; Eagle, M; Branoff, BL; Balogh, S; Miller, KM; Martin, RM; Hanson, A; Oczkowski, AJ; Huertas, E; Loffredo, J; Watson, EB	Recent Carbon Storage and Burial Exceed Historic Rates in the San Juan Bay Estuary Peri-Urban Mangrove Forests (Puerto Rico, United States)	FRONTIERS IN FORESTS AND GLOBAL CHANGE	Article	United States Environmental Protection Agency; United States Department of the Interior; United States Geological Survey; United States Environmental Protection Agency; United States Environmental Protection Agency; Drexel University; Drexel University		2021	10.3389/ffgc.2021.676691
de Sosa, LL; Benítez, E; Girón, I; Madejón, E	Agro-Industrial and Urban Compost as an Alternative of Inorganic Fertilizers in Traditional Rainfed Olive Grove under Mediterranean Conditions	AGRONOMY-BASEL	Article	Consejo Superior de Investigaciones Cientificas (CSIC); CSIC - Instituto de Recursos Naturales y Agrobiologia de Sevilla (IRNAS); Consejo Superior de Investigaciones Cientificas (CSIC); CSIC - Estacion Experimental del Zaidin (EEZ)		2021	10.3390/agronomy11061223
Hu, TP; Mao, Y; Liu, WJ; Shi, MM; Cheng, C; Xu, A; Su, YW; Li, XY; Zhang, YC; Zhang, ZQ; Qi, SH; Xing, XL	Deposition records of polycyclic aromatic hydrocarbons and black carbon in peat core from Dajiuhu, Shennongjia, Central China: human activity imprint since the industrial revolution	ENVIRONMENTAL SCIENCE AND POLLUTION RESEARCH	Article	China University of Geosciences	0944-1344	2021	10.1007/s11356-021-14383-7
Wang, K; Wang, XH; Piao, SL; Chevallier, F; Mao, JF; Shi, XY; Huntingford, C; Bastos, A; Ciais, P; Xu, H; Keeling, RF; Pacala, SW; Chen, AP	Unusual characteristics of the carbon cycle during the 2015-2016 El Nino	GLOBAL CHANGE BIOLOGY	Article	Peking University; Chinese Academy of Sciences; Institute of Tibetan Plateau Research, CAS; Chinese Academy of Sciences; UDICE-French Research Universities; Universite Paris Saclay; CEA; Centre National de la Recherche Scientifique (CNRS); United States Department of Energy (DOE); Oak Ridge National Laboratory; UK Centre for Ecology & Hydrology (UKCEH); Max Planck Society; University of Californi…	1354-1013	2021	10.1111/gcb.15669
Gao, DX; Wang, S; Li, ZD; Wei, FL; Chen, P; Song, S; Wang, YP; Wang, LX; Fu, BJ	Threshold of vapour-pressure deficit constraint on light use efficiency varied with soil water content	ECOHYDROLOGY	Article	Beijing Normal University; Chinese Academy of Sciences; Research Center for Eco-Environmental Sciences (RCEES); Indiana University System; Indiana University-Purdue University Indianapolis	1936-0584	2022	10.1002/eco.2305
Ibrahim, M; Li, G; Tang, YT	Biochar effects acidic soil remediation and Brassica oleracea L. toxicity-A case study in subtropical area of China	ENVIRONMENTAL TECHNOLOGY & INNOVATION	Article	Chinese Academy of Sciences; Institute of Urban Environment, CAS; Chinese Academy of Sciences; University of Chinese Academy of Sciences, CAS; Chinese Academy of Sciences; Institute of Urban Environment, CAS; University of Nottingham Ningbo China	2352-1864	2021	10.1016/j.eti.2021.101588
de Araujo, JE; Taketani, RG; Pylro, VS; Leite, LR; Silva, MDPE; Lemos, LN; Lourenço, MVD; Andreote, FD	Genomic analysis reveals the potential for hydrocarbon degradation of Rhodopirellula sp. MGV isolated from a polluted Brazilian mangrove	BRAZILIAN JOURNAL OF MICROBIOLOGY	Article	Universidade Federal de Lavras; Fundacao Oswaldo Cruz; Universidade de Sao Paulo	1517-8382	2021	10.1007/s42770-021-00483-6
Coull, M; Butler, B; Hough, R; Beesley, L	A Geochemical and Agronomic Evaluation of Technosols Made from Construction and Demolition Fines Mixed with Green Waste Compost	AGRONOMY-BASEL	Article	James Hutton Institute		2021	10.3390/agronomy11040649
Siciliano, T; Giua, R; Siciliano, M; Di Giulio, S; Genga, A	The morphology and chemical composition of the urban PM10 near a steel plant in Apulia determined by scanning electron microscopy. Source Apportionment	ATMOSPHERIC RESEARCH	Article	University of Salento; Regional Environmental Protection Agency - Italy; University of Salento	0169-8095	2021	10.1016/j.atmosres.2020.105416
Xie, XF; Xiang, Q; Wu, T; Zhu, M; Xu, F; Xu, Y; Pu, LJ	Impacts of Agricultural Land Reclamation on Soil Nutrient Contents, Pools, Stoichiometry, and Their Relationship to Oat Growth on the East China Coast	LAND	Article	Zhejiang Normal University; Ministry of Natural Resources of the People's Republic of China; Nanjing University; Zhejiang University of Finance & Economics; Suzhou University of Science & Technology		2021	10.3390/land10040355
Zeng, WJ; Wang, ZD; Chen, XY; Yao, XD; Wang, W	Increased nitrogen availability alters soil carbon quality by regulating microbial r-K growth strategy, metabolic efficiency, and biomass in degraded temperate grasslands	LAND DEGRADATION & DEVELOPMENT	Article	Peking University; Peking University; Fujian Normal University; Fujian Normal University	1085-3278	2021	10.1002/ldr.3943
Adamu, B; Ibrahim, S; Rasul, A; Whanda, SJ; Headboy, P; Muhammed, I; Maiha, IA	Evaluating the accuracy of spectral indices from Sentinel-2 data for estimating forest biomass in urban areas of the tropical savanna	REMOTE SENSING APPLICATIONS-SOCIETY AND ENVIRONMENT	Article	Soran University	2352-9385	2021	10.1016/j.rsase.2021.100484
Feng, JG; Zhu, B	Does calculation method affect the nutrient-addition effect on priming?	GEODERMA	Article	Peking University; Peking University	0016-7061	2021	10.1016/j.geoderma.2021.115040
Bezyk, Y; Oshurok, D; Dorodnikov, M; Sówka, I	Evaluation of the CALPUFF model performance for the estimation of the urban ecosystem CO2 flux	ATMOSPHERIC POLLUTION RESEARCH	Article	Wroclaw University of Science & Technology; National Academy of Sciences Ukraine; Ukrainian Hydrometeorological Institute of the State Emergency Service of Ukraine & National Academy of Sciences of Ukraine; University of Gottingen	1309-1042	2021	10.1016/j.apr.2020.12.013
Sun, XD; Ye, YQ; Guan, QW; Jones, DL	Organic mulching masks rhizosphere effects on carbon and nitrogen fractions and enzyme activities in urban greening space	JOURNAL OF SOILS AND SEDIMENTS	Article	Nanjing Forestry University; Bangor University	1439-0108	2021	10.1007/s11368-021-02900-7
Wang, Q; Feng, WH; Liu, M; Xu, H	Atmospheric elemental carbon deposition from urban and suburban sites of Shanghai: Characteristics, sources and comparison with aerosols and soils	ATMOSPHERIC POLLUTION RESEARCH	Article	Anhui Normal University; East China Normal University	1309-1042	2021	10.1016/j.apr.2020.11.001
Duarte, NC; Barbosa, AC; Magalhaes, TM; Montagner, CC; Cruz, LMD; Tonetti, AL	Conventional Anaerobic Reactors Applied to Denitrification: a Comparison Between Packed Bed and UASB Reactors Under Low COD Conditions	WATER AIR AND SOIL POLLUTION	Article		0049-6979	2021	10.1007/s11270-021-05009-2
Li, PY; Wang, ZH	Uncertainty and sensitivity analysis of modeling plant CO2 exchange in the built environment	BUILDING AND ENVIRONMENT	Article	Arizona State University; Arizona State University-Tempe	0360-1323	2021	10.1016/j.buildenv.2020.107539
Sapkota, M; Young, J; Slaughter, L; Acosta-Martínez, V; Coldren, C	Soil microbial biomass and composition from urban landscapes in a semiarid climate	APPLIED SOIL ECOLOGY	Article	Texas Tech University System; Texas Tech University	0929-1393	2021	10.1016/j.apsoil.2020.103810
Wang, BF; Wu, FC; Yin, JQ; Jiang, ZL; Song, XY; Reddy, GVP	Use of Taxonomic and Trait-Based Approaches to Evaluate the Effect of Bt maize Expressing Cry1Ie Protein on Non-Target Collembola: A Case Study in Northeast China	INSECTS	Article	Jilin Academy of Agricultural Sciences; United States Department of Agriculture (USDA)		2021	10.3390/insects12020088
Choi, D; Jung, S; Jung, MK; Park, YK; Tsang, YF; Kwon, HH; Kwon, EE	Strategic disposal of flood debris via CO2-assisted catalytic pyrolysis	JOURNAL OF HAZARDOUS MATERIALS	Article	Sejong University; Sejong University; University of Seoul	0304-3894	2021	10.1016/j.jhazmat.2021.125242
Konwuruk, N; Borquaye, LS; Darko, G; Dodd, M	Distribution, bioaccessibility and human health risks of toxic metals in peri-urban topsoils of the Kumasi Metropolis	SCIENTIFIC AFRICAN	Article	Kwame Nkrumah University Science & Technology; Kwame Nkrumah University Science & Technology	2468-2276	2021	10.1016/j.sciaf.2021.e00701
Liu, SN; An, SQ; Yan, ZB; Ren, JP; Lu, XQ; Ge, FY; Han, WX	Variation and potential influence factors of foliar pH in land-water ecozones of three small plateau lakes	JOURNAL OF PLANT ECOLOGY	Article	Sichuan Agricultural University; China Agricultural University; Peking University; University of Hong Kong	1752-9921	2021	10.1093/jpe/rtab003
Wu, HT; Hu, JL; Shaaban, M; Xu, P; Zhao, JS; Hu, RG	The effect of dolomite amendment on soil organic carbon mineralization is determined by the dolomite size	ECOLOGICAL PROCESSES	Article	Hubei Normal University; Huazhong Agricultural University; Bahauddin Zakariya University		2021	10.1186/s13717-020-00278-x
Ning, P; Maw, MJW; Yang, L; Fritschi, FB	Carbon accumulation in kernels of low-nitrogen maize is not limited by carbon availability but by an imbalance of carbon and nitrogen assimilates	JOURNAL OF PLANT NUTRITION AND SOIL SCIENCE	Article	China Agricultural University; University of Missouri System; University of Missouri Columbia; University System of Georgia; Abraham Baldwin Agricultural College; Peking University	1436-8730	2021	10.1002/jpln.202000112
Hill, AC; Barba, J; Hom, J; Vargas, R	Patterns and drivers of multi-annual CO2 emissions within a temperate suburban neighborhood	BIOGEOCHEMISTRY	Article	University of Delaware; University of Birmingham; United States Department of Agriculture (USDA); United States Forest Service	0168-2563	2021	10.1007/s10533-020-00731-1
Liao, HK; Fan, HX; Li, YY; Yao, HY	Influence of reductive soil disinfestation or biochar amendment on bacterial communities and their utilization of plant-derived carbon in the rhizosphere of tomato	APPLIED MICROBIOLOGY AND BIOTECHNOLOGY	Article	Chinese Academy of Sciences; Institute of Urban Environment, CAS; Chinese Academy of Sciences; Chinese Academy of Sciences; University of Chinese Academy of Sciences, CAS; Guizhou Normal University; Wuhan Institute of Technology	0175-7598	2021	10.1007/s00253-020-11036-6
Nayak, Y; Sahu, YK; Patel, KS; Sharma, S; Hung, CC; Martín-Ramos, P; Yurdakul, S	Distribution and Sources of Polychlorinated Biphenyls in Air, Dust, and Sediment from India	JOURNAL OF HAZARDOUS TOXIC AND RADIOACTIVE WASTE	Article	Pt. Ravishankar Shukla University; National Taiwan Ocean University; University of Zaragoza; Suleyman Demirel University	2153-5493	2021	10.1061/(ASCE)HZ.2153-5515.0000560
Sun, JF; Tian, AR; Feng, ZY; Zhang, Y; Jiang, FY; Tang, Q	Evaluation of Zero-Valent Iron for Pb(II) Contaminated Soil Remediation: From the Analysis of Experimental Mechanism Hybird with Carbon Emission Assessment	SUSTAINABILITY	Article	Soochow University - China; Soochow University - China; Kyoto University; Northeastern University		2021	10.3390/su13020452
Zhang, JW; Feng, YZ; Wu, M; Chen, RR; Li, ZP; Lin, XG; Zhu, YG; Delgado-Baquerizo, M	Evaluation of Microbe-Driven Soil Organic Matter Quantity and Quality by Thermodynamic Theory	MBIO	Article	Chinese Academy of Sciences; Institute of Soil Science, CAS; Chinese Academy of Sciences; Research Center for Eco-Environmental Sciences (RCEES); Chinese Academy of Sciences; Institute of Urban Environment, CAS; Universidad Pablo de Olavide; Western Sydney University	2150-7511	2021	10.1128/mBio.03252-20
Yang, GB; Zheng, ZH; Abbott, BW; Olefeldt, D; Knoblauch, C; Song, YT; Kang, LY; Qin, SQ; Peng, YF; Yang, YH	Characteristics of methane emissions from alpine thermokarst lakes on the Tibetan Plateau	NATURE COMMUNICATIONS	Article	Chinese Academy of Sciences; Institute of Botany, CAS; Chinese Academy of Sciences; University of Chinese Academy of Sciences, CAS; Brigham Young University; University of Alberta; University of Hamburg		2023	10.1038/s41467-023-38907-6
Hussain, AJ; Sankar, TK; Vithanage, M; Ambade, B; Gautam, S	Black Carbon Emissions from Traffic Contribute Sustainability to Air Pollution in Urban Cities of India	WATER AIR AND SOIL POLLUTION	Article	National Institute of Technology (NIT System); National Institute of Technology Jamshedpur; University Sri Jayewardenepura; Karunya Institute of Technology & Sciences; Karunya Institute of Technology & Sciences	0049-6979	2023	10.1007/s11270-023-06232-9
Zhao, ZH; Mao, YL; Gao, SF; Lu, CY; Pan, CJ; Li, XY	Organic carbon accumulation and aggregate formation in soils under organic and inorganic fertilizer management practices in a rice-wheat cropping system	SCIENTIFIC REPORTS	Article	Henan University of Urban Construction; Henan University of Urban Construction; Chinese Academy of Sciences; Institute of Soil Science, CAS; Shanxi Agricultural University	2045-2322	2023	10.1038/s41598-023-30541-y
Chen, HM; Zhao, Y; Fu, X; Tang, MF; Guo, MJ; Zhang, SQ; Zhu, Y; Qu, LY; Wu, G	Impacts of regional land-use patterns on ecosystem services in the typical agro-pastoral ecotone of northern China	ECOSYSTEM HEALTH AND SUSTAINABILITY	Article	Chinese Academy of Sciences; Research Center for Eco-Environmental Sciences (RCEES); Chinese Academy of Sciences; University of Chinese Academy of Sciences, CAS	2096-4129	2022	10.1080/20964129.2022.2110521
Xia, L; Zhao, BQ; Luo, T; Xu, WN; Guo, T; Xia, D	Microbial functional diversity in rhizosphere and non-rhizosphere soil of different dominant species in a vegetation concrete slope	BIOTECHNOLOGY & BIOTECHNOLOGICAL EQUIPMENT	Article	China Three Gorges University; China Three Gorges University; China Three Gorges University; China Three Gorges University	1310-2818	2022	10.1080/13102818.2022.2082319
Wang, H; Wigneron, JP; Ciais, P; Yao, YT; Fan, L; Liu, XZ; Li, XJ; Green, JK; Tian, F; Tao, SL; Li, W; Frappart, F; Albergel, C; Wang, MJ; Li, SC	Seasonal variations in vegetation water content retrieved from microwave remote sensing over Amazon intact forests	REMOTE SENSING OF ENVIRONMENT	Article	Peking University; INRAE; UDICE-French Research Universities; Universite de Bordeaux; UDICE-French Research Universities; Universite Paris Saclay; CEA; Centre National de la Recherche Scientifique (CNRS); Southwest University - China; University of California System; University of California Berkeley; Wuhan University; Tsinghua University; Zhengzhou University	0034-4257	2023	10.1016/j.rse.2022.113409
Belviso, S; Abadie, C; Montagne, D; Hadjar, D; Tropée, D; Vialettes, L; Kazan, V; Delmotte, M; Maignan, F; Remaud, M; Ramonet, M; Lopez, M; Yver-Kwok, C; Ciais, P	Carbonyl sulfide (COS) emissions in two agroecosystems in central France	PLOS ONE	Article	UDICE-French Research Universities; Universite Paris Saclay; CEA; Centre National de la Recherche Scientifique (CNRS); CNRS - National Institute for Earth Sciences & Astronomy (INSU); UDICE-French Research Universities; Universite Paris Saclay; AgroParisTech; INRAE; Centre National de la Recherche Scientifique (CNRS); AgroParisTech; UDICE-French Research Universities; Universite Paris Saclay; INR…	1932-6203	2022	10.1371/journal.pone.0278584
Abd El-Hamid, HT; Eid, EM; El-Morsy, MHE; Osman, HEM; Keshta, AE	Benefits of Blue Carbon Stocks in a Coastal Jazan Ecosystem Undergoing Land Use Change	WETLANDS	Article	Egyptian Knowledge Bank (EKB); National Institute of Oceanography & Fisheries (NIOF); King Khalid University; Egyptian Knowledge Bank (EKB); Kafrelsheikh University; Umm Al Qura University; Egyptian Knowledge Bank (EKB); Desert Research Center (DRC); Umm Al Qura University; Egyptian Knowledge Bank (EKB); Al Azhar University; Egyptian Knowledge Bank (EKB); Tanta University	0277-5212	2022	10.1007/s13157-022-01597-9
Gong, EJ; Shi, FX; Wang, ZH; Hu, QF; Zhang, J; Hai, HX	Evaluating Environmental Quality and Its Driving Force in Northeastern China Using the Remote Sensing Ecological Index	SUSTAINABILITY	Article	North China University of Water Resources & Electric Power; Yangtze River Water Resources Protection Bureau; Chang'an University		2022	10.3390/su142316304
Zhang, CZ; Zhao, ZH; Li, F; Zhang, JB	Effects of Organic and Inorganic Fertilization on Soil Organic Carbon and Enzymatic Activities	AGRONOMY-BASEL	Article	Chinese Academy of Sciences; Institute of Soil Science, CAS; Henan University of Urban Construction; Henan Agricultural University		2022	10.3390/agronomy12123125
Phillips, CL; Wang, RY; Mattox, C; Trammell, TLE; Young, J; Kowalewski, A	High soil carbon sequestration rates persist several decades in turfgrass systems: A meta-analysis	SCIENCE OF THE TOTAL ENVIRONMENT	Article	United States Department of Agriculture (USDA); Oregon State University; University of Delaware; Texas Tech University System; Texas Tech University; United States Department of Agriculture (USDA)	0048-9697	2023	10.1016/j.scitotenv.2022.159974
Li, H; Luo, QP; Zhao, S; Zhou, YY; Huang, FY; Yang, XR; Su, JQ	Effect of phenol formaldehyde-associated microplastics on soil microbial community, assembly, and functioning	JOURNAL OF HAZARDOUS MATERIALS	Article	Chinese Academy of Sciences; Institute of Urban Environment, CAS; Chinese Academy of Sciences; University of Chinese Academy of Sciences, CAS	0304-3894	2023	10.1016/j.jhazmat.2022.130288
Ran, PL; Hu, SG; Frazier, AE; Yang, SF; Song, XY; Qu, SJ	The dynamic relationships between landscape structure and ecosystem services: An empirical analysis from the Wuhan metropolitan area, China	JOURNAL OF ENVIRONMENTAL MANAGEMENT	Article	China University of Geosciences; Ministry of Natural Resources of the People's Republic of China; Arizona State University; Arizona State University-Tempe	0301-4797	2023	10.1016/j.jenvman.2022.116575
She, YC; Qi, X; Xin, XD; He, YQ; Wang, W; Li, ZK	Insights into microbial interactive mechanism regulating dissimilatory nitrate reduction processes in riparian freshwater aquaculture sediments	ENVIRONMENTAL RESEARCH	Article	Nanjing University; Nanjing University; Dongguan University of Technology; Harbin Institute of Technology	0013-9351	2023	10.1016/j.envres.2022.114593
Zhi, JJ; Cao, XY; Zhang, ZH; Qin, TT; Qu, L; Qi, LY; Ge, LW; Guo, AX; Wang, XT; Da, C; Sun, Y; Liu, WB; Zhang, HM; Fu, XW	Identifying the determinants of crop yields in China since 1952 and its policy implications	AGRICULTURAL AND FOREST METEOROLOGY	Article	Anhui Normal University; Shanghai Normal University; China University of Mining & Technology	0168-1923	2022	10.1016/j.agrformet.2022.109216
Wang, Q; Wang, HJ; Zeng, HR; Chang, RH; Bai, XP	Understanding relationships between landscape multifunctionality and land-use change across spatiotemporal characteristics: Implications for supporting landscape management decisions	JOURNAL OF CLEANER PRODUCTION	Article	Wuhan University; Ministry of Natural Resources of the People's Republic of China; Beijing Normal University; Wuhan University	0959-6526	2022	10.1016/j.jclepro.2022.134474
Ye, LP; Ji, LL; Chen, HF; Chen, XY; Tan, WF	Spatial Contribution of Environmental Factors to Soil Aggregate Stability in a Small Catchment of the Loess Plateau, China	AGRONOMY-BASEL	Article	Ministry of Natural Resources of the People's Republic of China; Chinese Academy of Sciences; Wuhan Botanical Garden, CAS; Gannan Normal University; China Three Gorges University; Huazhong Agricultural University		2022	10.3390/agronomy12102557
Ji, JH; Zhao, T; Li, FH	Remediation technology towards zero plastic pollution: Recent advance and perspectives	ENVIRONMENTAL POLLUTION	Article	China Agricultural University; Harbin Institute of Technology	0269-7491	2022	10.1016/j.envpol.2022.120166
Ren, YF; Yuan, WR; Zhang, BT; Wang, SJ	Does improvement of environmental efficiency matter in reducing carbon emission intensity? Fresh evidence from 283 prefecture-level cities in China	JOURNAL OF CLEANER PRODUCTION	Article	Beijing Forestry University; Guangdong University of Finance & Economics; Sun Yat Sen University	0959-6526	2022	10.1016/j.jclepro.2022.133878
Singh, K; Byun, C; Bux, F	Ecological restoration of degraded ecosystems in India: Science and practices	ECOLOGICAL ENGINEERING	Article	Durban University of Technology; Andong National University	0925-8574	2022	10.1016/j.ecoleng.2022.106708
Xu, ZJ; Zhu, HB; Shu, LY; Lai, XX; Lu, W; Fu, L; Jiang, B; He, T; Wang, FP; Li, QS	Estimation of the fraction of soil-borne particulates in indoor air by PMF and its impact on health risk assessment of soil contamination in Guangzhou, China	ENVIRONMENTAL POLLUTION	Article	Jinan University; Jinan University	0269-7491	2022	10.1016/j.envpol.2022.119623
Zhang, HJ; Zhou, M; Dong, LZ; Deng, YY; Wang, W	Critical transition of multifunctional stability induced by nitrogen enrichment in grasslands differing in degradation severity	SCIENCE OF THE TOTAL ENVIRONMENT	Article	Peking University; Peking University	0048-9697	2022	10.1016/j.scitotenv.2022.157660
Rahmonov, O; Czajka, A; Nádudvari, A; Fajer, M; Spórna, T; Szypula, B	Soil and Vegetation Development on Coal-Waste Dump in Southern Poland	INTERNATIONAL JOURNAL OF ENVIRONMENTAL RESEARCH AND PUBLIC HEALTH	Article	University of Silesia in Katowice; University of Silesia in Katowice		2022	10.3390/ijerph19159167
Wang, XX; Wang, JF; Zhang, LY; Lv, CY; Liu, LL; Zhao, HX; Gao, J	Climatic Factors Determine the Distribution Patterns of Leaf Nutrient Traits at Large Scales	PLANTS-BASEL	Article	Xinjiang Normal University; Peking University		2022	10.3390/plants11162171
Zhang, ZP; Ding, JL; Zhu, CM; Shi, HB; Chen, XY; Han, LJ; Wang, JZ	Changes in soil organic carbon stocks from 1980-1990 and 2010-2020 in the northwest arid zone of China	LAND DEGRADATION & DEVELOPMENT	Article	Xinjiang University; Xinjiang University; Xinjiang University; Lanzhou University; Shenzhen University; Shenzhen University; Shenzhen University	1085-3278	2022	10.1002/ldr.4293
Hu, CG; Wang, ZY; Li, JM; Liu, H; Sun, DQ	Quantifying the Temporal and Spatial Patterns of Ecosystem Services and Exploring the Spatial Differentiation of Driving Factors: a Case Study of Sichuan Basin, China	FRONTIERS IN ENVIRONMENTAL SCIENCE	Article	Huazhong University of Science & Technology; Nanjing University; Chinese Academy of Sciences; Institute of Geographic Sciences & Natural Resources Research, CAS; Kyoto University		2022	10.3389/fenvs.2022.927818
Lo Piccolo, E; Becagli, M; Lauria, G; Cantini, V; Ceccanti, C; Cardelli, R; Massai, R; Remorini, D; Guidi, L; Landi, M	Biochar as a soil amendment in the tree establishment phase: What are the consequences for tree physiology, soil quality and carbon sequestration?	SCIENCE OF THE TOTAL ENVIRONMENT	Article	University of Pisa; University of Pisa	0048-9697	2022	10.1016/j.scitotenv.2022.157175
Wang, XX; Zhou, LY; Zhou, GY; Zhou, HM; Lu, CY; Gu, ZZ; Liu, RQ; He, YH; Du, ZG; Liang, XA; He, HB; Zhou, XH	Tradeoffs of fungal and bacterial residues mediate soil carbon dynamics under persistent drought in subtropical evergreen forests	APPLIED SOIL ECOLOGY	Article	East China Normal University; Northeast Forestry University - China; Chinese Academy of Sciences; Shenyang Institute of Applied Ecology, CAS; Chinese Academy of Sciences; University of Chinese Academy of Sciences, CAS; East China Normal University	0929-1393	2022	10.1016/j.apsoil.2022.104588
Khodakarami, L; Pourmanafi, S; Soffianian, AR; Lotfi, A	Modeling Spatial Distribution of Carbon Sequestration, CO2 Absorption, and O2 Production in an Urban Area: Integrating Ground-Based Data, Remote Sensing Technique, and GWR Model	EARTH AND SPACE SCIENCE	Article	Isfahan University of Technology		2022	10.1029/2022EA002261
Speetjens, NJ; Tanski, G; Martin, V; Wagner, J; Richter, A; Hugelius, G; Boucher, C; Lodi, R; Knoblauch, C; Koch, BP; Wünsch, U; Lantuit, H; Vonk, JE	Dissolved organic matter characterization in soils and streams in a small coastal low-Arctic catchment	BIOGEOSCIENCES	Article	Helmholtz Association; Alfred Wegener Institute, Helmholtz Centre for Polar & Marine Research; Natural Resources Canada; Lands & Minerals Sector - Natural Resources Canada; Geological Survey of Canada; Consiglio Nazionale delle Ricerche (CNR); Istituto di Scienze Polari (ISP-CNR); University of Hamburg; Helmholtz Association; Alfred Wegener Institute, Helmholtz Centre for Polar & Marine Research;…	1726-4170	2022	10.5194/bg-19-3073-2022
Jin, TT; Liu, W; Wang, Y; Zhao, M; Fu, Y; Dong, YL; Luo, TY; Fu, H; Wang, Q	Effects of urbanization intensity on glomalin-related soil protein in Nanchang, China: Influencing factors and implications for greenspace soil improvement	JOURNAL OF ENVIRONMENTAL MANAGEMENT	Article	Jiangxi Agricultural University; Jiangxi Agricultural University; Yuxi Normal University; Chinese Academy of Sciences	0301-4797	2022	10.1016/j.jenvman.2022.115611
Deng, PY; Wan, WX; Azeem, M; Riaz, L; Zhang, W; Yang, YY; Li, CK; Yuan, W	Characterization of biochar derived from bamboo and its application to modulate the toxic effects of chromium on wheat plant	BIOMASS CONVERSION AND BIOREFINERY	Article; Early Access	Zhengzhou Normal University; Chinese Academy of Sciences; Institute of Urban Environment, CAS; North China University of Water Resources & Electric Power	2190-6815	2022	10.1007/s13399-022-02879-2
Song, XQ; Geng, Y; Zhang, YQ; Zhang, X; Gao, ZY	Dynamic potassium flows analysis in China for 2010-2019	RESOURCES POLICY	Article	Shanghai Jiao Tong University; Shanghai Jiao Tong University; Shanghai Jiao Tong University; Shanghai Jiao Tong University; Shanghai Jiao Tong University; University of Shanghai for Science & Technology	0301-4207	2022	10.1016/j.resourpol.2022.102803
Li, BJ; Shen, CC; Wu, HY; Zhang, LM; Wang, JC; Liu, SY; Jing, ZW; Ge, Y	Environmental selection dominates over dispersal limitation in shaping bacterial biogeographical patterns across different soil horizons of the Qinghai-Tibet Plateau	SCIENCE OF THE TOTAL ENVIRONMENT	Article	Chinese Academy of Sciences; Research Center for Eco-Environmental Sciences (RCEES); Chinese Academy of Sciences; University of Chinese Academy of Sciences, CAS; Chinese Academy of Sciences; Institute of Soil Science, CAS	0048-9697	2022	10.1016/j.scitotenv.2022.156177
Hellman, M; Valhondo, C; Martinez-Landa, L; Carrera, J; Juhanson, J; Hallin, S	Nitrogen Removal Capacity of Microbial Communities Developing in Compost- and Woodchip-Based Multipurpose Reactive Barriers for Aquifer Recharge With Wastewater	FRONTIERS IN MICROBIOLOGY	Article	Swedish University of Agricultural Sciences; Consejo Superior de Investigaciones Cientificas (CSIC); CSIC - Centro de Investigacion y Desarrollo Pascual Vila (CID-CSIC); CSIC - Instituto de Diagnostico Ambiental y Estudios del Agua (IDAEA); Universitat Politecnica de Catalunya		2022	10.3389/fmicb.2022.877990
Zhang, ZF; Nie, SQ; Sang, YM; Mo, SM; Li, JH; Kashif, M; Su, GJ; Yan, B; Jiang, CJ	Effects of Spartina alterniflora Invasion on Nitrogen Fixation and Phosphorus Solubilization in a Subtropical Marine Mangrove Ecosystem	MICROBIOLOGY SPECTRUM	Article	Guangxi Academy of Sciences; Guangxi University; Guangxi Academy of Sciences; Chinese Academy of Sciences; Research Center for Eco-Environmental Sciences (RCEES); Chinese Academy of Sciences; University of Chinese Academy of Sciences, CAS	2165-0497	2022	10.1128/spectrum.00682-21
Wen, Z; Jiang, ZY; Zheng, H; Ouyang, ZY	Tropical forest strata shifts in plant structural diversity-aboveground carbon relationships along altitudinal gradients	SCIENCE OF THE TOTAL ENVIRONMENT	Article	Chinese Academy of Sciences; Research Center for Eco-Environmental Sciences (RCEES); Chinese Academy of Sciences; University of Chinese Academy of Sciences, CAS	0048-9697	2022	10.1016/j.scitotenv.2022.155907
Di Iorio, E; Napoletano, P; Circelli, L; Memoli, V; Santorufo, L; De Marco, A; Colombo, C	Comparison of natural and technogenic soils developed on volcanic ash by Vis-NIR spectroscopy	CATENA	Article	University of Molise; University of Naples Federico II; University of Naples Federico II	0341-8162	2022	10.1016/j.catena.2022.106369
Mo, XH; Wang, MK; Wang, YH; Chen, XW; Zhang, A; Zeng, H; Zheng, Y; Kong, DL; Wang, JJ	Molecular-level characteristics of soil organic carbon in rhizosheaths from a semiarid grassland of North China	SOIL BIOLOGY & BIOCHEMISTRY	Article	Southern University of Science & Technology; Southern University of Science & Technology; Peking University Shenzhen Graduate School; Peking University; Chinese Academy of Tropical Agricultural Sciences; Henan Agricultural University	0038-0717	2022	10.1016/j.soilbio.2022.108682
Li, Y; Wang, J; Shen, CC; Wang, JC; Singh, BK; Ge, Y	Plant diversity improves resistance of plant biomass and soil microbial communities to drought	JOURNAL OF ECOLOGY	Article	Chinese Academy of Sciences; Research Center for Eco-Environmental Sciences (RCEES); Chinese Academy of Sciences; University of Chinese Academy of Sciences, CAS; Taizhou University; Western Sydney University; Western Sydney University	0022-0477	2022	10.1111/1365-2745.13900
Wang, Y; Wang, SJ; Jiang, L; Ma, L; Li, XY; Zhong, MS; Zhang, WY	Does the Geographic Difference of Soil Properties Matter for SettingUp the Soil Screening Levels in Large Countries Like China?	ENVIRONMENTAL SCIENCE & TECHNOLOGY	Article		0013-936X	2022	10.1021/acs.est.1c08771
Huang, R; Tian, Q; Zhang, Y; Wu, YH; Li, ZZ; Tang, ZT; Zhou, AY	Response of Leaf Functional Traits of Landscape Plants to Urban Green Space Environment in Lanzhou, China	FORESTS	Article	Gansu Agricultural University		2022	10.3390/f13050682
Havu, M; Kulmala, L; Kolari, P; Vesala, T; Riikonen, A; Järvi, L	Carbon sequestration potential of street tree plantings in Helsinki	BIOGEOSCIENCES	Article	University of Helsinki; Finnish Meteorological Institute; University of Helsinki; University of Helsinki	1726-4170	2022	10.5194/bg-19-2121-2022
Wang, QQ; Huang, Q; Wang, JX; Li, HS; Qin, JH; Li, XH; Gouda, SG; Liu, Y; Liu, Q; Guo, GM; Khan, MA; Su, XS; Lin, LY; Qin, JM; Lu, WK; Zhao, Y; Hu, S; Wang, JF	Ecological circular agriculture: A case study evaluating biogas slurry applied to rice in two soils	CHEMOSPHERE	Article	Hainan University; South China Agricultural University; Ministry of Agriculture & Rural Affairs; Egyptian Knowledge Bank (EKB); Benha University; Chinese Academy of Sciences; Institute of Urban Environment, CAS	0045-6535	2022	10.1016/j.chemosphere.2022.134628
Jorat, ME; Kraavi, KE; Manning, DAC	Removal of atmospheric CO2 by engineered soils in infrastructure projects	JOURNAL OF ENVIRONMENTAL MANAGEMENT	Article	University of Abertay Dundee; Newcastle University - UK	0301-4797	2022	10.1016/j.jenvman.2022.115016
Salmon, E; Jégou, F; Guenet, B; Jourdain, L; Qiu, CJ; Bastrikov, V; Guimbaud, C; Zhu, D; Ciais, P; Peylin, P; Gogo, S; Laggoun-Défarge, F; Aurela, M; Bret-Harte, MS; Chen, JQ; Chojnicki, BH; Chu, HS; Edgar, CW; Euskirchen, ES; Flanagan, LB; Fortuniak, K; Holl, D; Klatt, J; Kolle, O; Kowalska, N; Kutzbach, L; Lohila, A; Merbold, L; Pawlak, W; Sachs, T; Ziemblinska, K	Assessing methane emissions for northern peatlands in ORCHIDEE-PEAT revision 7020	GEOSCIENTIFIC MODEL DEVELOPMENT	Article	Centre National de la Recherche Scientifique (CNRS); Universite de Orleans; UDICE-French Research Universities; Universite Paris Saclay; CEA; Centre National de la Recherche Scientifique (CNRS); CNRS - National Institute for Earth Sciences & Astronomy (INSU); UDICE-French Research Universities; Universite Paris Cite; Universite PSL; Centre National de la Recherche Scientifique (CNRS); Peking Univ…	1991-959X	2022	10.5194/gmd-15-2813-2022
Fan, GD; Zhang, JK; Wang, YM; Huang, KS; Wang, SM; Yao, YX; Luo, J	Microbial community and nitrogen transformation pathway in bioretention system for stormwater treatment in response to formulated soil medium	PROCESS SAFETY AND ENVIRONMENTAL PROTECTION	Article	Fuzhou University; Fuzhou University; Southwest University - China	0957-5820	2022	10.1016/j.psep.2022.03.077
Abongwa, PT; Den, W; Teague, A	Chemical and Carbon Isotopic Characterization of a Karst-Dominated Urbanized Watershed: Case of the Upper San Antonio River	ARCHIVES OF ENVIRONMENTAL CONTAMINATION AND TOXICOLOGY	Article	Texas A&M University System; Texas A&M University San Antonio; Texas A&M University System; Texas A&M University San Antonio	0090-4341	2022	10.1007/s00244-022-00921-y
Teng, HF; Chen, SC; Luo, ZK; Shi, Z; Zhou, Y; Wan, D; Yao, HY	Drivers of water erosion-induced lateral soil carbon loss on the Tibetan Plateau	CATENA	Article	Wuhan Institute of Technology; Zhejiang University; Tibet Agriculture & Animal Husbandry University; Zhejiang University of Finance & Economics; Chinese Academy of Sciences; Institute of Urban Environment, CAS	0341-8162	2022	10.1016/j.catena.2021.105970
Chen, QL; Hu, HW; Yan, ZZ; Zhu, YG; He, JZ; Delgado-Baquerizo, M	Cross-biome antibiotic resistance decays after millions of years of soil development	ISME JOURNAL	Article	Chinese Academy of Sciences; Institute of Urban Environment, CAS; University of Melbourne; Consejo Superior de Investigaciones Cientificas (CSIC); CSIC - Instituto de Recursos Naturales y Agrobiologia de Sevilla (IRNAS)	1751-7362	2022	10.1038/s41396-022-01225-8
Portmann, AC; LeFevre, GH; Hankawa, R; Werner, D; Higgins, CP	The regenerative role of biofilm in the removal of pesticides from stormwater in biochar-amended biofilters	ENVIRONMENTAL SCIENCE-WATER RESEARCH & TECHNOLOGY	Article	Colorado School of Mines; University of Iowa; Newcastle University - UK	2053-1400	2022	10.1039/d1ew00870f
Wang, FF; Li, ZM; Fu, BJ; Lü YH; Liu, GP; Wang, DB; Wu, X	Short-Term Grazing Exclusion Alters Soil Bacterial Co-occurrence Patterns Rather Than Community Diversity or Composition in Temperate Grasslands	FRONTIERS IN MICROBIOLOGY	Article	Chinese Academy of Sciences; Research Center for Eco-Environmental Sciences (RCEES); Chinese Academy of Sciences; University of Chinese Academy of Sciences, CAS; Chinese Academy of Sciences; Institute of Subtropical Agriculture, CAS; Chinese Academy of Sciences; Institute of Subtropical Agriculture, CAS; Beijing Normal University; Yangtze University		2022	10.3389/fmicb.2022.824192
Oulehle, F; Tahovská, K; Ac, A; Kolár, T; Rybnícek, M; Cermák, P; Stepánek, P; Trnka, M; Urban, O; Hruska, J	Changes in forest nitrogen cycling across deposition gradient revealed by δ15N in tree rings	ENVIRONMENTAL POLLUTION	Article	Czech Geological Survey; Czech Academy of Sciences; Global Change Research Centre of the Czech Academy of Sciences; University of South Bohemia Ceske Budejovice; Mendel University in Brno; Mendel University in Brno	0269-7491	2022	10.1016/j.envpol.2022.119104
Ge, JL; Xu, WT; Xiong, GM; Zhao, CM; Li, JX; Liu, Q; Tang, ZY; Xie, ZQ	Depth-Dependent Controls Over Soil Organic Carbon Stock across Chinese Shrublands	ECOSYSTEMS	Article	Chinese Academy of Sciences; Institute of Botany, CAS; Central South University of Forestry & Technology; Chinese Academy of Sciences; Chengdu Institute of Biology, CAS; Chinese Academy of Sciences; Chengdu Institute of Biology, CAS; Peking University; Peking University; Chinese Academy of Sciences; University of Chinese Academy of Sciences, CAS	1432-9840	2023	10.1007/s10021-022-00757-6
Dong, JY; Wang, LF; Quan, Q; Zhang, JG; Li, X; Zhao, D; Fang, JH; Cao, QQ; Liu, J	Factors controlling soil organic carbon content in wetlands at multiple scales and assessment of the universality of estimation equations: A mega-data study	SCIENCE OF THE TOTAL ENVIRONMENT	Article	Shandong University; Xi'an University of Technology; Chinese Academy of Sciences; Institute of Soil Science, CAS; Qufu Normal University; Shandong Jianzhu University	0048-9697	2022	10.1016/j.scitotenv.2022.154380
Cao, J; Pan, YP; Yu, SS; Zheng, B; Ji, DS; Hu, JB; Liu, J	Rapid decline in atmospheric organic carbon deposition in rural Beijing, North China between 2016 and 2020	ATMOSPHERIC ENVIRONMENT	Article	Chinese Academy of Sciences; Institute of Atmospheric Physics, CAS; Chinese Academy of Sciences; University of Chinese Academy of Sciences, CAS; Tsinghua University	1352-2310	2022	10.1016/j.atmosenv.2022.119030
Maia, PD; Vieira, M; Prado, LF; da Silva, LCM; Sodré, FF; Ribeiro, HDV; Ventura, RS	Assessment of atmospheric particulate matter (PM10) in Central Brazil: Chemical and morphological aspects	ATMOSPHERIC POLLUTION RESEARCH	Article	Universidade de Brasilia; Universidade Federal de Lavras; Universidade de Sao Paulo; Universidade de Brasilia; Universidade de Brasilia	1309-1042	2022	10.1016/j.apr.2022.101362
Yu, H; Li, JJ; Liu, J; He, SF; Qin, KA; Xia, XH; Xue, CH; Zhao, QL; Wei, LL	HYDRUS-2D simulations of typical pollutant migration in a soil aquifer system in the Zibo-Weifang funnel area of China	JOURNAL OF CLEANER PRODUCTION	Article	Harbin Institute of Technology; Beijing University of Civil Engineering & Architecture; Harbin Institute of Technology	0959-6526	2022	10.1016/j.jclepro.2022.131099
Moran-Rodas, VE; Chavannavar, SV; Joergensen, RG; Wachendorf, C	Microbial response of distinct soil types to land-use intensification at a South-Indian rural-urban interface	PLANT AND SOIL	Article	Universitat Kassel; University of Agricultural Sciences Bangalore	0032-079X	2022	10.1007/s11104-021-05292-2
Pilogallo, A; Scorza, F	Mapping Regulation Ecosystem Services Specialization in Italy	JOURNAL OF URBAN PLANNING AND DEVELOPMENT	Article	University of Basilicata; University of Basilicata	0733-9488	2022	10.1061/(ASCE)UP.1943-5444.0000801
Steinparzer, M; Haluza, D; Godbold, DL	Integrating Tree Species Identity and Diversity in Particulate Matter Adsorption	FORESTS	Article	University of Natural Resources & Life Sciences, Vienna; Medical University of Vienna; Czech Academy of Sciences; Global Change Research Centre of the Czech Academy of Sciences		2022	10.3390/f13030481
Zhang, Y; Gui, HJ; Zhang, SF; Li, CX	Diversity and Potential Function of Prokaryotic and Eukaryotic Communities from Different Mangrove Sediments	SUSTAINABILITY	Article	Xiamen University; Chinese Academy of Fishery Sciences; South China Sea Fisheries Research Institute, CAFS; Xiamen University		2022	10.3390/su14063333
Matthews, B; Schume, H	Tall tower eddy covariance measurements of CO2 fluxes in Vienna, Austria	ATMOSPHERIC ENVIRONMENT	Article	University of Natural Resources & Life Sciences, Vienna	1352-2310	2022	10.1016/j.atmosenv.2022.118941
Li, HY; Liu, ZY; Tan, CH; Zhang, XR; Zhang, ZY; Bai, XJ; Wu, LY; Yang, H	Efficient nitrogen removal from stormwater runoff by bioretention system: The construction of plant carbon source-based heterotrophic and sulfur autotrophic denitrification process	BIORESOURCE TECHNOLOGY	Article	Beijing University of Civil Engineering & Architecture	0960-8524	2022	10.1016/j.biortech.2022.126803
Lin, Y; Luo, K; Su, ZL; Wu, Y; Xiao, W; Qin, MX; Lin, J; Zhang, SJ; Zhang, Y; Jiang, YQ; Peng, BJ; Guo, YJ; Wang, X; Wang, YJ	Imposed by urbanization on soil heavy metal content of lake wetland and evaluation of ecological risks in East Dongting Lake	URBAN CLIMATE	Article	Central South University of Forestry & Technology	2212-0955	2022	10.1016/j.uclim.2022.101117
Liu, X; Li, YZ; Ma, KK; Yang, L; Li, ML; Li, CX; Wang, RJ; Wang, NL; Deng, L; He, MY; Huang, HY	Spatial distribution and potential sources of arsenic and water-soluble ions in the snow at Ili River Valley, China	CHEMOSPHERE	Article	Northwest University Xi'an; Chinese Academy of Sciences; Nanjing Institute of Geography & Limnology, CAS; Chinese Academy of Sciences; Institute of Earth Environment, CAS	0045-6535	2022	10.1016/j.chemosphere.2022.133845
Pham, DT; Tarafdar, A; Kim, PG; Kwon, JH	Profiling and assessing soil-air exchange of polycyclic aromatic hydrocarbons (PAHs) in playground dust and soil using ex situ equilibrium passive sampling	CHEMOSPHERE	Article	Korea University	0045-6535	2022	10.1016/j.chemosphere.2021.133083
Iftikhar, F; Liu, SL; Sun, YX; Liu, YX; Imran, M	Spatial distribution of trace elements associated with organic carbon along the Beiyun River basin, Beijing, China	INTERNATIONAL JOURNAL OF SEDIMENT RESEARCH	Article	Beijing Normal University; Shaanxi Academy of Sciences	1001-6279	2022	10.1016/j.ijsrc.2021.10.005
Södergren, J; Larsson, CU; Wadsö, L; Bergstrand, KJ; Asp, H; Hultberg, M; Schelin, J	Food waste to new food: Risk assessment and microbial community analysis of anaerobic digestate as a nutrient source in hydroponic production of vegetables	JOURNAL OF CLEANER PRODUCTION	Article	Lund University; Lund University; Swedish University of Agricultural Sciences	0959-6526	2022	10.1016/j.jclepro.2021.130239
Xu, P; Jiang, MD; Jiang, YB; Khan, I; Zhou, W; Wu, HT; Wu, X; Shaaban, M; Lu, JW; Hu, RG	Prior nitrogen fertilization stimulated N2O emission from rice cultivation season under a rapeseed-rice production system	PLANT AND SOIL	Article	Ministry of Agriculture & Rural Affairs; Huazhong Agricultural University; Hubei Normal University; Bahauddin Zakariya University	0032-079X	2022	10.1007/s11104-021-05162-x
Hong, SB; Chen, AP	Contrasting Responses of Soil Inorganic Carbon to Afforestation in Acidic Versus Alkaline Soils	GLOBAL BIOGEOCHEMICAL CYCLES	Article	Peking University; Colorado State University; Colorado State University	0886-6236	2022	10.1029/2021GB007038
Kukkonen, MO; Khamis, M; Muhammad, MJ; Kayhko, N; Luoto, M	Modeling direct above-ground carbon loss due to urban expansion in Zanzibar City Region, Tanzania	LAND USE POLICY	Article	University of Helsinki; University of Turku; University of Helsinki	0264-8377	2022	10.1016/j.landusepol.2021.105810
Winbourne, JB; Smith, IA; Stoynova, H; Kohler, C; Gately, CK; Logan, BA; Reblin, J; Reinmann, A; Allen, DW; Hutyra, LR	Quantification of Urban Forest and Grassland Carbon Fluxes Using Field Measurements and a Satellite-Based Model in Washington DC/Baltimore Area	JOURNAL OF GEOPHYSICAL RESEARCH-BIOGEOSCIENCES	Article	Boston University; University of Massachusetts System; University of Massachusetts Lowell; City University of New York (CUNY) System; Bowdoin College; City University of New York (CUNY) System; Hunter College (CUNY); National Institute of Standards & Technology (NIST) - USA	2169-8953	2022	10.1029/2021JG006568
Yun, HB; Tang, J; D'Imperio, L; Wang, XB; Qu, Y; Liu, LC; Zhuang, QL; Zhang, WX; Wu, QB; Chen, AP; Zhu, Q; Chen, DL; Elberling, B	Warming and Increased Respiration Have Transformed an Alpine Steppe Ecosystem on the Tibetan Plateau From a Carbon Dioxide Sink Into a Source	JOURNAL OF GEOPHYSICAL RESEARCH-BIOGEOSCIENCES	Article	Chinese Academy of Sciences; University of Copenhagen; Purdue University System; Purdue University West Lafayette Campus; Purdue University; Lund University; Chinese Academy of Sciences; East China Normal University; University of Minnesota System; University of Minnesota Twin Cities; Colorado State University; Colorado State University; United States Department of Energy (DOE); Lawrence Berkeley…	2169-8953	2022	10.1029/2021JG006406
Xu, R; Tian, H; Pan, N; Thompson, RL; Canadell, JG; Davidson, EA; Nevison, C; Winiwarter, W; Shi, H; Pan, S; Chang, J; Ciais, P; Dangal, SRS; Ito, A; Jackson, RB; Joos, F; Lauerwald, R; Lienert, S; Maavara, T; Millet, DB; Raymond, PA; Regnier, P; Tubiello, FN; Vuichard, N; Wells, KC; Wilson, C; Yang, J; Yao, Y; Zaehle, S; Zhou, F	Magnitude and Uncertainty of Nitrous Oxide Emissions From North America Based on Bottom-Up and Top-Down Approaches: Informing Future Research and National Inventories	GEOPHYSICAL RESEARCH LETTERS	Article	Auburn University System; Auburn University; Oregon State University; NILU; Commonwealth Scientific & Industrial Research Organisation (CSIRO); University System of Maryland; University of Maryland Center for Environmental Science; International Institute for Applied Systems Analysis (IIASA); University of Zielona Gora; Zhejiang University; UDICE-French Research Universities; Universite Paris Sac…	0094-8276	2021	10.1029/2021GL095264
Lin, Y; Zhang, QJ; Deng, YJ; Wu, Q; Ye, XPF; Wang, SQ; Fang, GG	Fabricating Graphene and Nanodiamonds from Lignin by Femtosecond Laser Irradiation	ACS OMEGA	Article	Chinese Academy of Forestry; Institute of Chemical Industry of Forest Products, CAF; University of Tennessee System; University of Tennessee Knoxville; UT Institute of Agriculture; Chinese Academy of Sciences; Institute of Urban Environment, CAS; Zhejiang A&F University; University of Tennessee System; University of Tennessee Knoxville; UT Institute of Agriculture	2470-1343	2021	10.1021/acsomega.1c05328
Zhang, LX; Guan, YT	Consistent responses of soil bacterial communities to bioavailable silicon deficiency in croplands	GEODERMA	Article	Tsinghua University; University of California System; University of California Irvine	0016-7061	2022	10.1016/j.geoderma.2021.115587
Wu, Z; Zhou, RB; Zeng, ZY	Identifying and Mapping the Responses of Ecosystem Services to Land Use Change in Rapidly Urbanizing Regions: A Case Study in Foshan City, China	REMOTE SENSING	Article	Guangzhou University; Shenzhen Urban Planning & Land Resource Research Center		2021	10.3390/rs13214374
Xiang, G; Long, SX; Liu, HJ; Wu, XL	Cd(II) removal from aqueous solutions by pomelo peel derived biochar in a permeable reactive barrier: modelling, optimization and mechanism	MATERIALS RESEARCH EXPRESS	Article	Guizhou Normal University; Guizhou Medical University; Peking University		2021	10.1088/2053-1591/ac386b
Wang, KR; Gao, LR; Zhu, S; Liu, X; Chen, QW; Cui, LL; Qiao, L; Xu, C; Huang, D; Wang, S; Zheng, MH	Short- and medium-chain chlorinated paraffins in soil from an urban area of northern China: Levels, distribution, and homolog patterns	SCIENCE OF THE TOTAL ENVIRONMENT	Article	Chinese Academy of Sciences; Research Center for Eco-Environmental Sciences (RCEES); China National Institute of Standardization; Chinese Academy of Sciences; University of Chinese Academy of Sciences, CAS; Jianghan University	0048-9697	2022	10.1016/j.scitotenv.2021.150833
Pilková, Z; Hiller, E; Filová, L; Jurkovic, L	Sixteen priority polycyclic aromatic hydrocarbons in roadside soils at traffic light intersections (Bratislava, Slovakia): concentrations, sources and influencing factors	ENVIRONMENTAL GEOCHEMISTRY AND HEALTH	Article	Comenius University Bratislava; Comenius University Bratislava	0269-4042	2022	10.1007/s10653-021-01122-7
Prokof'eva, TV; Shoba, SA; Lysak, LV; Ivanova, AE; Glushakova, AM; Shishkov, VA; Lapygina, EV; Shilaika, PD; Glebova, AA	Organic Constituents and Biota in the Urban Atmospheric Solid Aerosol: Potential Effects on Urban Soils	EURASIAN SOIL SCIENCE	Article	Lomonosov Moscow State University; Russian Academy of Sciences; Saratov Scientific Center of the Russian Academy of Sciences; Severtsov Institute of Ecology & Evolution; Russian Academy of Sciences; Russian Academy of Medical Sciences; Research Institute of Vaccines and Sera Mechnikov, RAMS; Russian Academy of Sciences; Institute of Geography, Russian Academy of Sciences	1064-2293	2021	10.1134/S1064229321100094
Bolisetty, S; Rahimi, A; Mezzenga, R	Arsenic removal from Peruvian drinking water using milk protein nanofibril-carbon filters: a field study	ENVIRONMENTAL SCIENCE-WATER RESEARCH & TECHNOLOGY	Article	Swiss Federal Institutes of Technology Domain; ETH Zurich; Swiss Federal Institutes of Technology Domain; ETH Zurich	2053-1400	2021	10.1039/d1ew00456e
Lv, CM; He, YF; Zhang, WG; Gu, CK; Li, Y; Yan, DH	Quantitative Analysis of Eco-economic Benefits of Urban Reclaimed Water Greening Based on Emergy Theory	WATER RESOURCES MANAGEMENT	Article	Zhengzhou University; Yangtze River Water Resources Protection Bureau; China Institute of Water Resources & Hydropower Research	0920-4741	2021	10.1007/s11269-021-02987-0
Halim, MA; Vantellingen, J; Gorgolewski, AS; Rose, WK; Drake, JAP; Margolis, L; Thomas, SC	Greenhouse gases and green roofs: carbon dioxide and methane fluxes in relation to substrate characteristics	URBAN ECOSYSTEMS	Article	University of Toronto; University of Toronto; University of Toronto	1083-8155	2022	10.1007/s11252-021-01166-8
Islam, MS; Ahmed, MK; Idris, AM; Phoungthong, K; Habib, MA; Mustafa, RA	Geochemical speciation and bioaccumulation of trace elements in different tissues of pumpkin in the abandoned soils: Health hazard perspective in a developing country	TOXIN REVIEWS	Article	University of Dhaka; University of Dhaka; King Khalid University; King Khalid University; Prince of Songkla University; Geological Survey of Bangladesh (GSB)	1556-9543	2022	10.1080/15569543.2021.1977325
Shahid, A; Khan, AZ; Malik, S; Liu, CG; Mehmood, MA; Syafiuddin, A; Wang, N; Zhu, H; Boopathy, R	Advances in Green Technologies for the Removal of Effluent Organic Matter from the Urban Wastewater	CURRENT POLLUTION REPORTS	Article	Sichuan University of Science & Engineering; Government College University Faisalabad; Shanghai Jiao Tong University; University of Louisiana System; Nicholls State University	2198-6592	2021	10.1007/s40726-021-00203-6
[truncated: 5,838 more rows]

## Sheet: SCREENING_1
SCREENING: Organization of the results from A - Z (Article Title). Exclusion of duplicates.
Comment: red color means exclusion
[truncated: 6,620 more rows]

## Sheet: SCREENING_2
SCREENING: Organization of the results from A to Z (Article Title). Exclusion on Titles.
[truncated: 2,595 more rows]

[truncated: 2 more sheets: SCREENING_3, INCLUDED TO ENCODE]
